# Supplementary material for: One-shot access to α,β-difunctionalized azepenes and dehydropiperidines by reductive cross-coupling of α-selenonyl-β-selenyl enamides with organic bromides
Source: Royal Society of Chemistry journal article supplement (doi:10.1039/c5ob01003a), 2015-01-01
Supplement: c5ob01003a1.pdf [file c5ob01003a1.pdf]

Supporting Information for:

One-shot access to  $\alpha,\beta$ -difunctionalized azepenes and dehydropiperidines by reductive cross-coupling of  $\alpha$ -selenonyl- $\beta$ -selenyl enamides with organic bromides

*Timothy K. Beng,\* Ann Wens V. Silaire, Amir Alwali, and Daniel P. Bassler*

*Department of Chemistry, Susquehanna University, Selinsgrove,  
PA 17870, USA  
[beng@susqu.edu](mailto:beng@susqu.edu)*

*Contents:*

|                                                                                                       |     |
|-------------------------------------------------------------------------------------------------------|-----|
| 1. General information and procedures.....                                                            | S2  |
| 2. Synthesis of $\alpha$ -selenonyl enecarbamates and eneformamides .....                             | S5  |
| 3. Iron-catalyzed substitutive deselenonation .....                                                   | S11 |
| 4. Regioselective lithiation/trapping of $\alpha$ -selenonyl enamides with hetero-electrophiles ..... | S22 |
| 5. Cobalt-catalyzed reductive cross-coupling of doubly activated enamides .....                       | S35 |
| 6. References .....                                                                                   | S59 |

## 1. General Information and Procedures

All experiments involving air- and moisture-sensitive reagents such as transition metal precatalysts were carried out under an inert atmosphere of argon or nitrogen, using freshly distilled solvents. Dichloromethane was distilled from  $\text{MgSO}_4$ . Organic bromides and other simple reagents were obtained from commercial sources. All electrophiles that were not newly purchased were distilled immediately before use. TMEDA was distilled on a short path, over  $\text{CaH}_2$ . Column chromatography was performed on silica gel (230-400 mesh). Thin-layer chromatography (TLC) was performed on silica plates. Visualization of the TLC plates was aided by UV irradiation at 254 nm or by  $\text{KMnO}_4$ , CAM, and *p*-anisaldehyde staining. Unless otherwise indicated,  $^1\text{H}$ ,  $^{13}\text{C}$ , and DEPT-135 spectra were acquired using  $\text{C}_6\text{D}_6$  or  $\text{CDCl}_3$  as solvent, at room temperature. Chemical shifts are quoted in parts per million (ppm). HRMS- $\text{EI}^+$  data were obtained using either electrospray ionization (ESI) or electron impact (EI) techniques. High-resolution ESI was obtained on an LTQ-FT (ion trap; analyzed using Excalibur). High resolution EI was obtained on an Autospec (magnetic sector; analyzed using MassLynx).

### General Procedure A: Selenation of enecarbamates with $\text{PhSeSePh}$

To an oven-dried, septum-capped round bottom flask equipped with a stir bar, was added freshly distilled TMEDA (0.09 mL, 0.6 mmol, 1.2 equiv) and a solution of the enecarbamate (0.5 mmol, 1.0 equiv) in THF (5 mL) under argon. The mixture was cooled to  $-60\text{ }^\circ\text{C}$  and a solution of *n*-BuLi (0.24 mL, 2.5 M in hexanes, 0.6 mmol, 1.2 equiv) was added slowly. After 2 h at this temperature, the mixture was quenched with  $\text{PhSeSePh}$  (2 equiv). The mixture was slowly warmed to room temperature and *sat.*  $\text{NH}_4\text{Cl}$  was added. The layers were separated and the aqueous layer was extracted with  $\text{Et}_2\text{O}$ . The combined organic layers were dried over  $\text{Na}_2\text{SO}_4$ , filtered and evaporated to obtain the crude product, which was oxidized immediately without further purification.

### General Procedure B1: Selenation of $\alpha$ -bromo eneformamides with $\text{PhSeSePh}$

Sodium borohydride (6 mmol) was added to a solution of diphenyl diselenide (3 mmol) in DMF (8 mL) at  $120\text{ }^\circ\text{C}$ . After 1 h, a solution of the bromo eneformamide (1 mmol) was added. After 5 h (TLC monitoring), the reaction mixture was poured into *sat*  $\text{NH}_4\text{Cl}_{(\text{aq})}$  solution and extracted

with Et<sub>2</sub>O. The combined organic layers were washed with water, then with brine, dried over Na<sub>2</sub>SO<sub>4</sub>, filtered, and evaporated under reduced pressure to obtain the crude products.

**General Procedure B2:** Diphenyldiselenide (1.2 mmol) was added to a solution of the bromoeneforamide (1 mmol) in dry acetonitrile (8 mL) at room temperature and the mixture was heated to 80 °C. After 4 h, the mixture was directly evaporated. To the resulting residue, potassium *tert*-butoxide (2 mmol) in THF (8 mL) was added and the mixture was allowed to stand for 1 h at room temperature. The reaction mixtures were poured into aqueous NH<sub>4</sub>Cl solution and extracted with Et<sub>2</sub>O. The organic layers were dried over Na<sub>2</sub>SO<sub>4</sub>, filtered, and concentrated under reduced pressure to obtain the crude selenide, which was immediately oxidized.

#### General Procedure C: Oxidation of Selenides

The crude selenide (1 mmol) was dissolved in CH<sub>2</sub>Cl<sub>2</sub> (4 mL) and MeOH (4 mL) at room temperature and *m*-CPBA (4 mmol) was added. Following complete consumption of the selenide (TLC monitoring), the mixture was poured onto 10% Na<sub>2</sub>CO<sub>3</sub> solution, and extracted with Et<sub>2</sub>O. The organic layers were washed with water, dried, and evaporated. Purification was carried out by flash chromatography on silica (pretreated with 1% Et<sub>3</sub>N).

**Procedure D: Alkylative deselenonation with Grignard reagents:** To an oven-dried, septum-capped two-necked flask equipped with a stir bar were added freshly distilled TMEDA (0.90 mL, 6.00 mmol, 6.0 equiv), PhMgBr (3.0 M in Et<sub>2</sub>O, 1.00 mL, 3.00 mmol, 3.0 equiv) diluted with anhydrous *tert*-butyl methyl ether (TBME, 3.0 mL) via syringe under an argon atmosphere. One of the septa was opened and Fe(acac)<sub>3</sub> (7.1 mg, 0.020 mmol, 2 mol%) was rapidly introduced and the suspension was diluted with TBME (5.0 mL) was added. After several minutes (~5 min), α-selenonyl enecarbamate **1a** (371 mg, 1.00 mmol, 1.0 equiv) in TBME (5.0 mL) was added. The suspension was sonicated until a clear solution was obtained (~10 min, longer time required for less soluble Grignard reagents). After 5 h at rt (TLC and GC-MS monitoring), the mixture was quenched by slow addition of *sat* NH<sub>4</sub>Cl. It was then filtered through a pad of Celite under vacuum and the remaining residue was rinsed with EtOAc. The filtrate was transferred to a separatory funnel, and the layers were separated. The aqueous layer was extracted with EtOAc

and the combined organic extracts were dried over Na<sub>2</sub>SO<sub>4</sub> (30 min), filtered, and concentrated in under reduced pressure to give the crude product.

**General Procedure E: ( $\beta$ -regioselective lithiation/heterosubstitution):** To an oven-dried, septum-capped round bottom flask equipped with a stir bar, was added freshly distilled TMEDA (1.8 mL, 1.2 mmol, 1.2 equiv) and a solution of the enecarbamate (1 mmol, 1.0 equiv) in THF (10 mL) under argon. The mixture was cooled to  $-78^{\circ}\text{C}$  and a solution of *t*-BuLi (1.2 mL, 1.0 M in pentane, 1.2 mmol, 1.2 equiv; in the case of eneformamides) or *n*-BuLi (0.5 mL, 2.0 M in hexanes; in the case of enecarbamates) was added slowly. After 1 h at this temperature, the mixture was quenched with the desired electrophile (2 equiv). The mixture was slowly warmed to room temperature and *sat.* NH<sub>4</sub>Cl was added. The layers were separated and the aqueous layer was extracted with Et<sub>2</sub>O. The combined organic layers were dried over Na<sub>2</sub>SO<sub>4</sub>, filtered and evaporated to obtain the crude product.

**General Procedure F:** To a solution of CoBr<sub>2</sub> (22 mg, 0.10 mmol, 10 mol%), bis-1,2-diphenylphosphinopropane (41.2 mg, 0.10 mmol, 10 mol%), and manganese powder (165 mg, 3 mmol, 3 equiv) in acetonitrile (5 mL) was added the aryl bromide (2 mmol, 2 equiv) at the desired temperature (rt for the bromo eneformamides or  $40^{\circ}\text{C}$  for the bromo enecarbamates). A solution of the bromo eneformamide (1 mmol, 1 equiv) in acetonitrile (5 mL) was added slowly. After completion (as judged by TLC and GC-MS), the reaction mixture was treated with a mild acid such as 10% H<sub>3</sub>PO<sub>4</sub> (aq) and extracted with CH<sub>2</sub>Cl<sub>2</sub>. The combined organic layers were dried over MgSO<sub>4</sub>, filtered and concentrated under reduced pressure to afford the desired coupling product as an oil. Purification was carried out by flash chromatography on silica (pretreated with 1% Et<sub>3</sub>N).

## 2. Preparation of $\alpha$ -selenonyl dehydropiperidines and azepenes

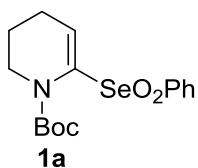

Prepared from **6a** (183 mg, 1.0 mmol) using **General Procedures A** and **C**. Purification: Flash chromatography on silica (pretreated with 1% Et<sub>3</sub>N) eluting with PE/DCM (2:1). Yield = 289 mg; 78%. <sup>1</sup>H NMR (400 MHz, C<sub>6</sub>D<sub>6</sub>)  $\delta$  7.33 to 7.28 (2H, m), 7.18 to 7.06 (3H, m), 5.09 to 5.06 (1H, t), 3.70 to 3.64 (2H, dd), 1.82 to 1.73 (2H, m), 1.53 to 1.44 (2H, m), 1.10 (9H, s). <sup>13</sup>C NMR (101 MHz, C<sub>6</sub>D<sub>6</sub>)  $\delta$  153.7, 141.5, 140.6, 127.0, 125.5, 114.2, 79.5, 44.2, 27.5, 23.5, 23.4. HRMS calc for C<sub>16</sub>H<sub>21</sub>NO<sub>4</sub>Se 371.0636, found 371.0631.

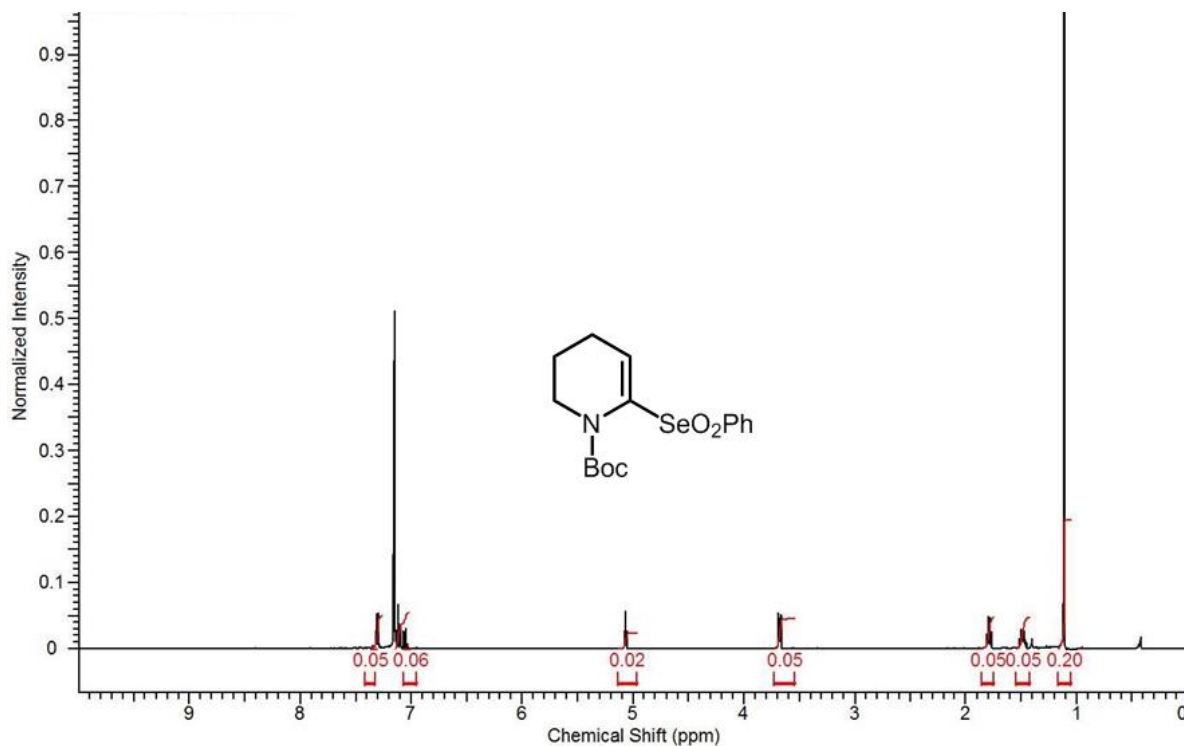

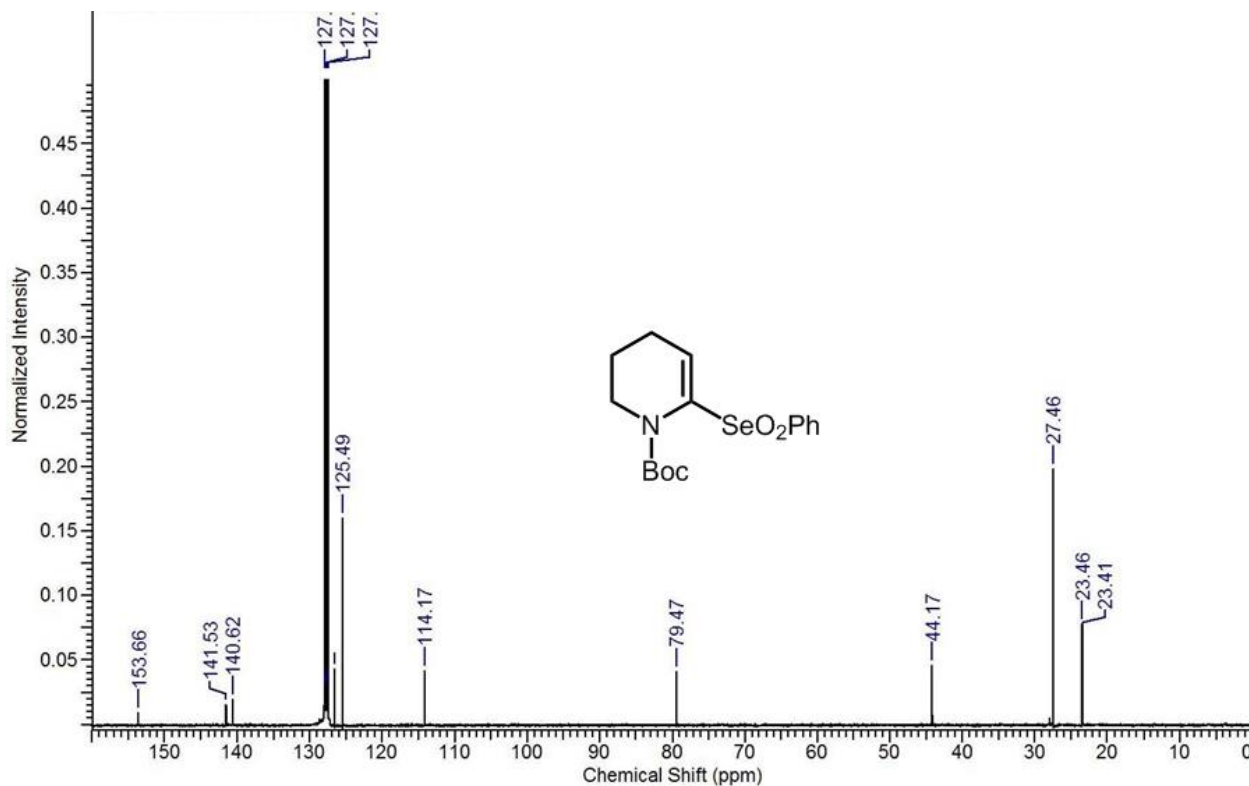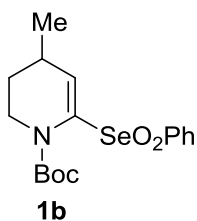

Prepared from **6b** (197 mg, 1 mmol) using **General Procedures A** and **C**. Purification: Flash chromatography on silica (pretreated with 1% Et<sub>3</sub>N). PE/DCM (2:1). Yield = 324 mg; 84%. <sup>1</sup>H NMR (400 MHz, C<sub>6</sub>D<sub>6</sub>, mixture of rotamers) δ 7.45 (1H, d) 7.18 to 6.99 (4H, m), 5.01 (1H, t), 3.91 to 3.55 (2H, dd), 2.09 to 2.03 (1H, m), 1.68 to 1.50 (1H, m), 1.46 to 1.02 (11H, m), 0.86 to 0.60 (3H, d). <sup>13</sup>C NMR (101 MHz, C<sub>6</sub>D<sub>6</sub>, mixture of rotamers) δ 153.55, 141.36, 141.31, 139.53, 128.67, 127.09, 126.63, 125.63, 120.02, 79.52, 78.33, 42.77, 31.54, 28.84, 28.21, 27.96, 27.42, 21.58, 21.16. HRMS calc for C<sub>17</sub>H<sub>23</sub>NO<sub>4</sub>Se 385.0792, found 385.0796.

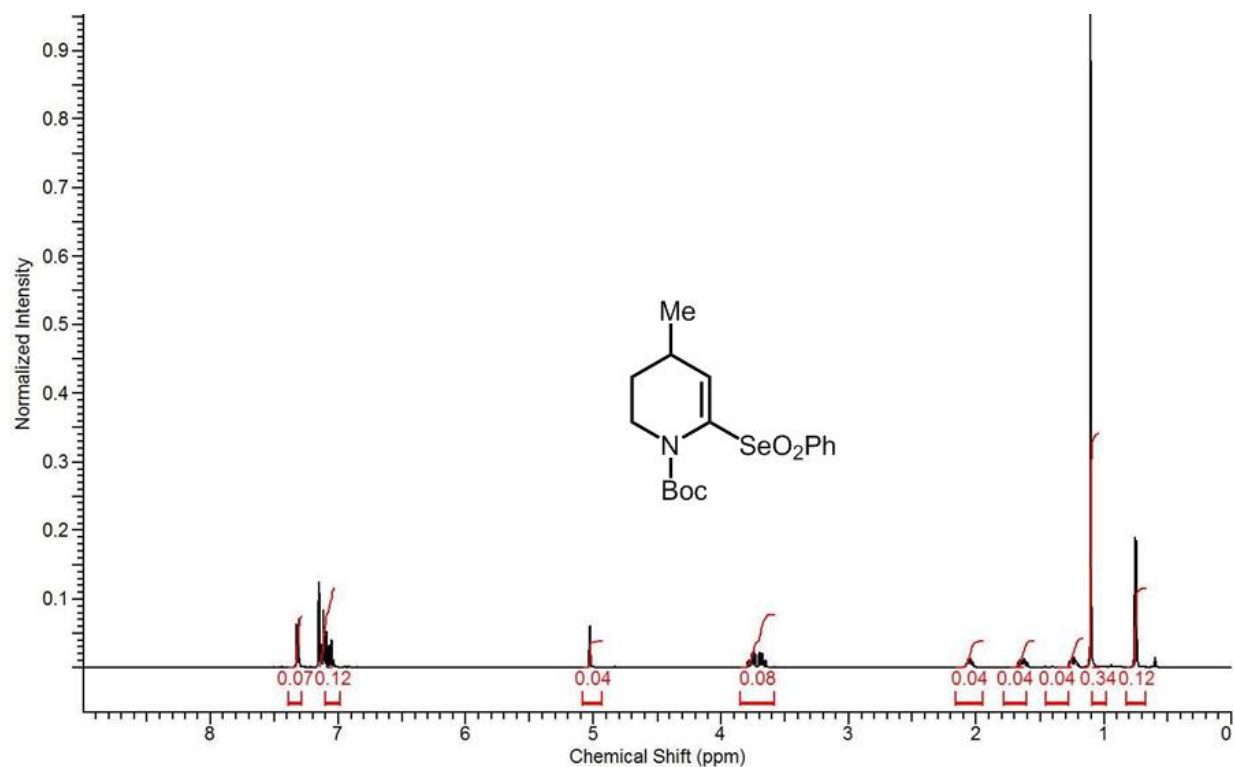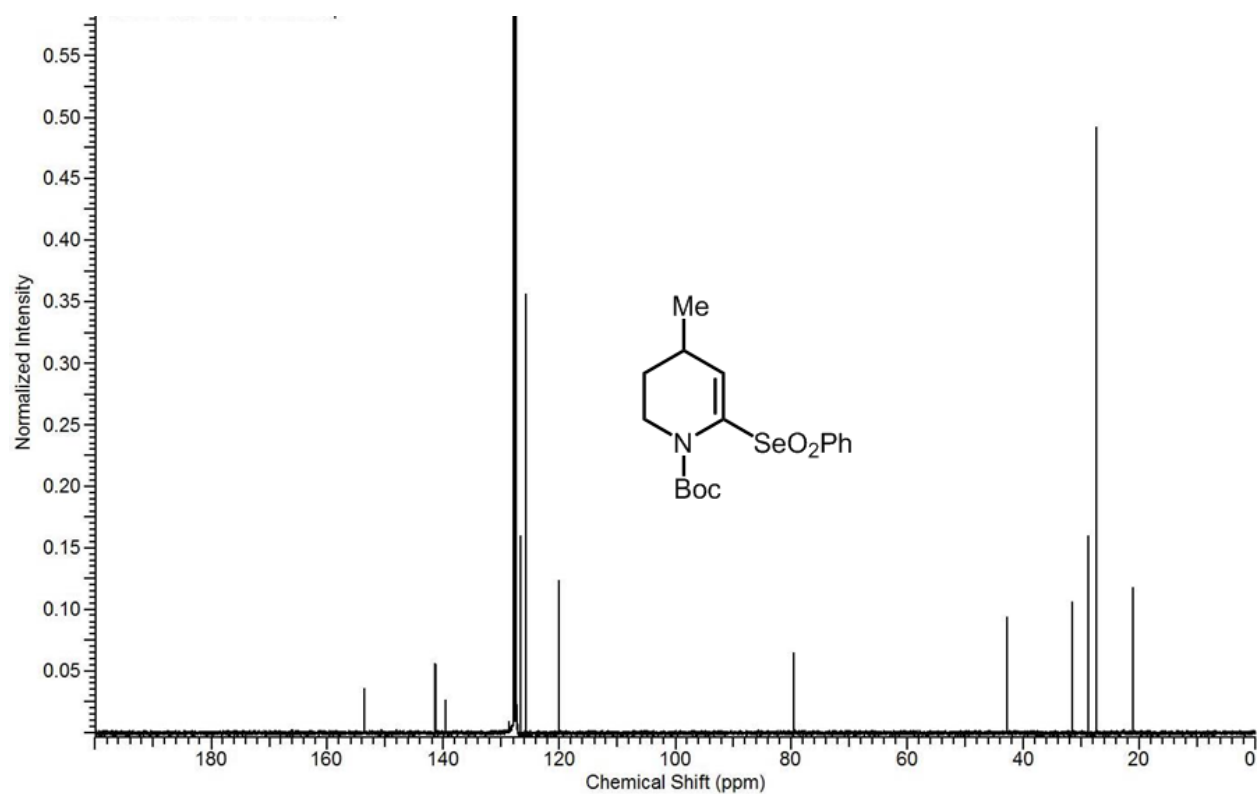

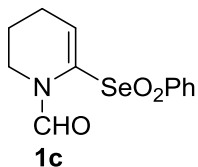

Prepared from **7a** (189 mg, 1 mmol) using **General Procedures B1** and **C**. Purification: Flash chromatography on silica (pretreated with 1% Et<sub>3</sub>N) eluting with hexane/EtOAc (70:30). Yield = 213 mg, 71%. <sup>1</sup>H NMR (400 MHz, C<sub>6</sub>D<sub>6</sub>) δ 9.35 (1H, s), 7.28 to 7.21 (2H, m), 7.00 to 6.93 (3H, m), 5.28 to 5.25 (1H, t), 3.46 to 3.43 (2H, dd), 1.60 to 1.52 (2H, m), 1.20 to 1.14 (2H, m). <sup>13</sup>C NMR (101 MHz, C<sub>6</sub>D<sub>6</sub>) δ 160.6, 132.1, 129.3, 129.0, 122.7, 121.58, 118.0, 93.4, 83.0, 39.3, 23.6, 20.9. HRMS calc for C<sub>12</sub>H<sub>13</sub>NO<sub>3</sub>Se 299.0061, found 299.0065.

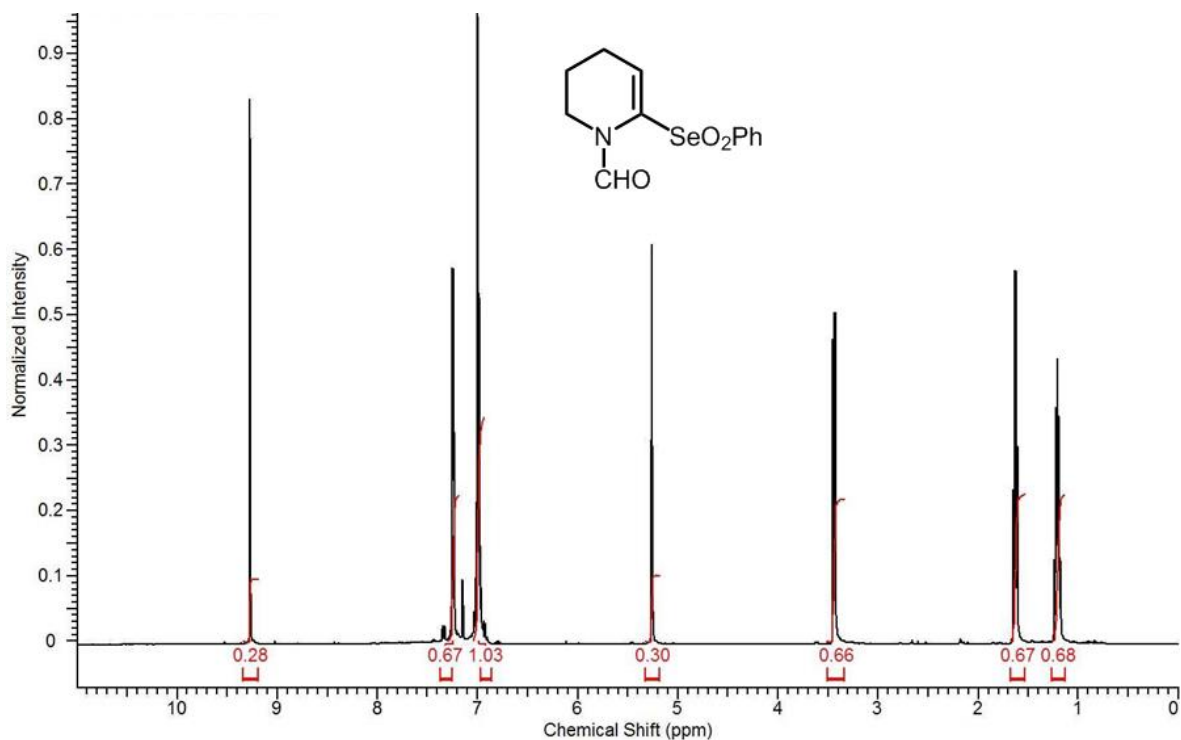



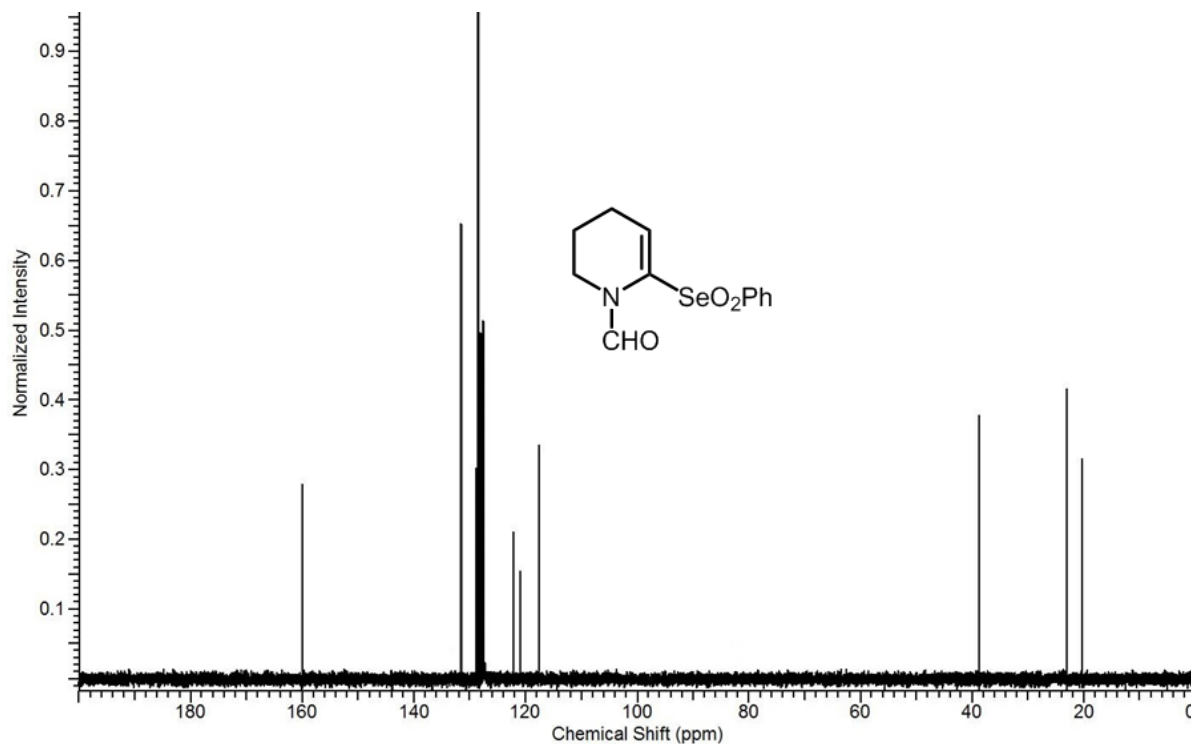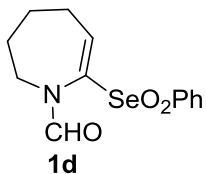

Prepared from **7b** (203 mg, 1 mmol) using **General Procedures B2** and **C**. Purification: Flash chromatography on silica (pretreated with 1% Et<sub>3</sub>N) eluting with hexane/EtOAc (70:30). Yield = 235 mg, 75%. <sup>1</sup>H NMR (400 MHz, C<sub>6</sub>D<sub>6</sub>, mixture of rotamers) δ 8.07 (1H, s), 7.11 to 7.01 (5H, m), 5.58 to 5.54 (1H, t), 3.58 to 3.55 (2H, dd), 1.86 to 1.82 (2H, m), 1.59 to 1.53 (2H, m), 1.21 to 1.15 (2H, m). <sup>13</sup>C NMR (101 MHz, C<sub>6</sub>D<sub>6</sub>) δ 161.8, 143.0, 138.5, 131.4, 128.6, 125.9, 123.3, 44.2, 28.7, 27.2, 24.1. HRMS calc for C<sub>13</sub>H<sub>15</sub>NO<sub>3</sub>Se 313.0217, found 313.0221.

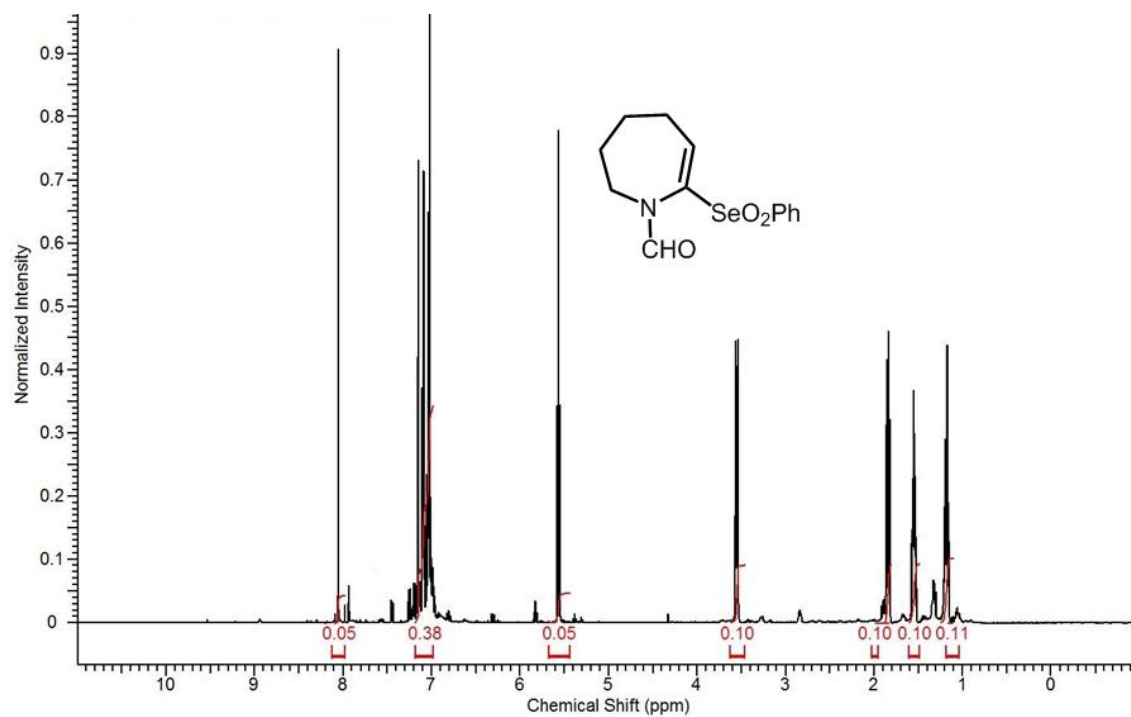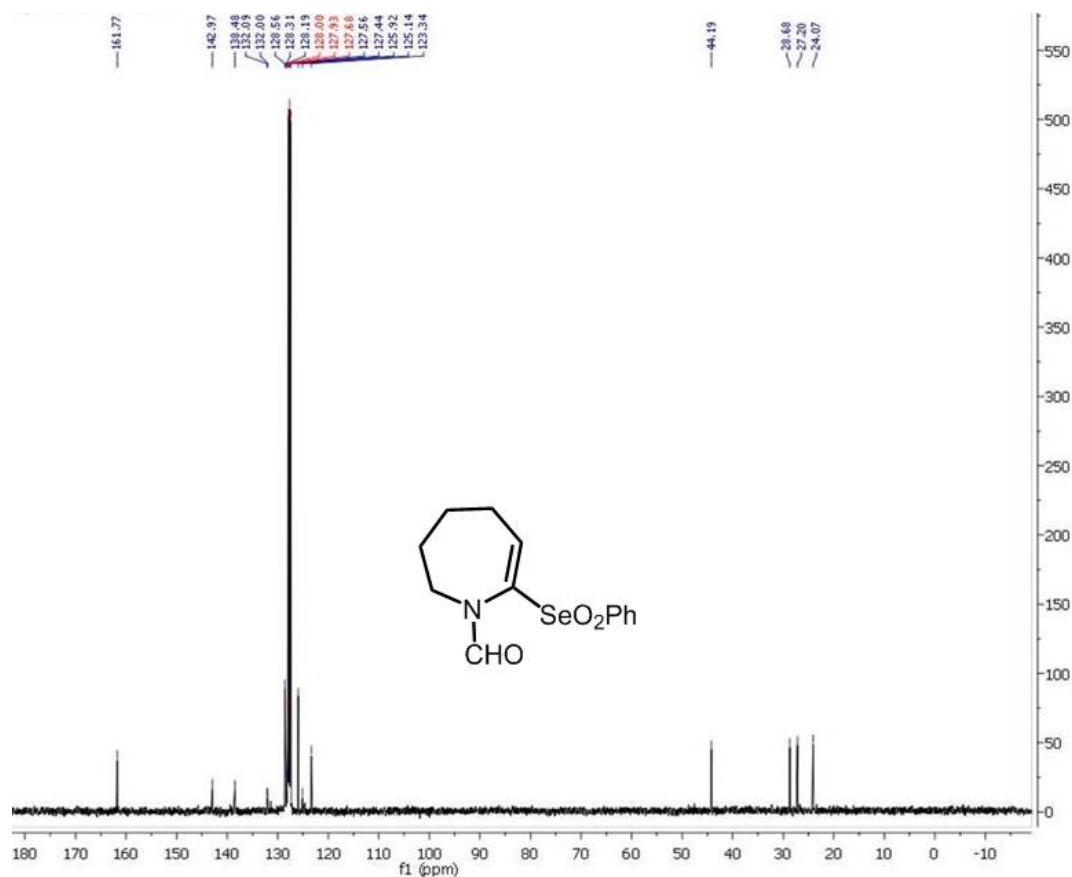

### 3. Preparation of $\alpha$ -carbofunctionalized dehydropiperidines and azepenes

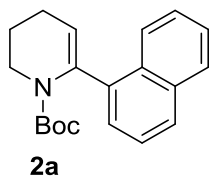

Prepared from **1a** (371 mg, 1 mmol) and 1-naphthylmagnesium bromide (3 equiv) using **General Procedure D**. Purification: Flash chromatography on silica (pretreated with 1% Et<sub>3</sub>N) eluting with PE/DCM (2:1). Yield = 216 mg; 70%. <sup>1</sup>H NMR (400 MHz, C<sub>6</sub>D<sub>6</sub>)  $\delta$  8.16 (1H, d), 7.81 to 7.85 (6H, m), 5.18 to 5.17 (1H, t), 3.79 to 3.71 (2H, dd), 1.88 to 1.83 (2H, m), 1.55 to 1.52 (2H, m), 0.98 (9H, s). <sup>13</sup>C NMR (101 MHz, C<sub>6</sub>D<sub>6</sub>)  $\delta$  153.7, 140.5, 138.9, 133.6, 132.7, 128.5, 128.2, 127.8, 127.5, 127.2, 126.0, 125.3, 124.5, 123.7, 114.9, 79.5, 44.2, 27.3, 23.6, 23.4. HRMS calc for C<sub>20</sub>H<sub>23</sub>NO<sub>2</sub> 309.1729, found 309.1733.

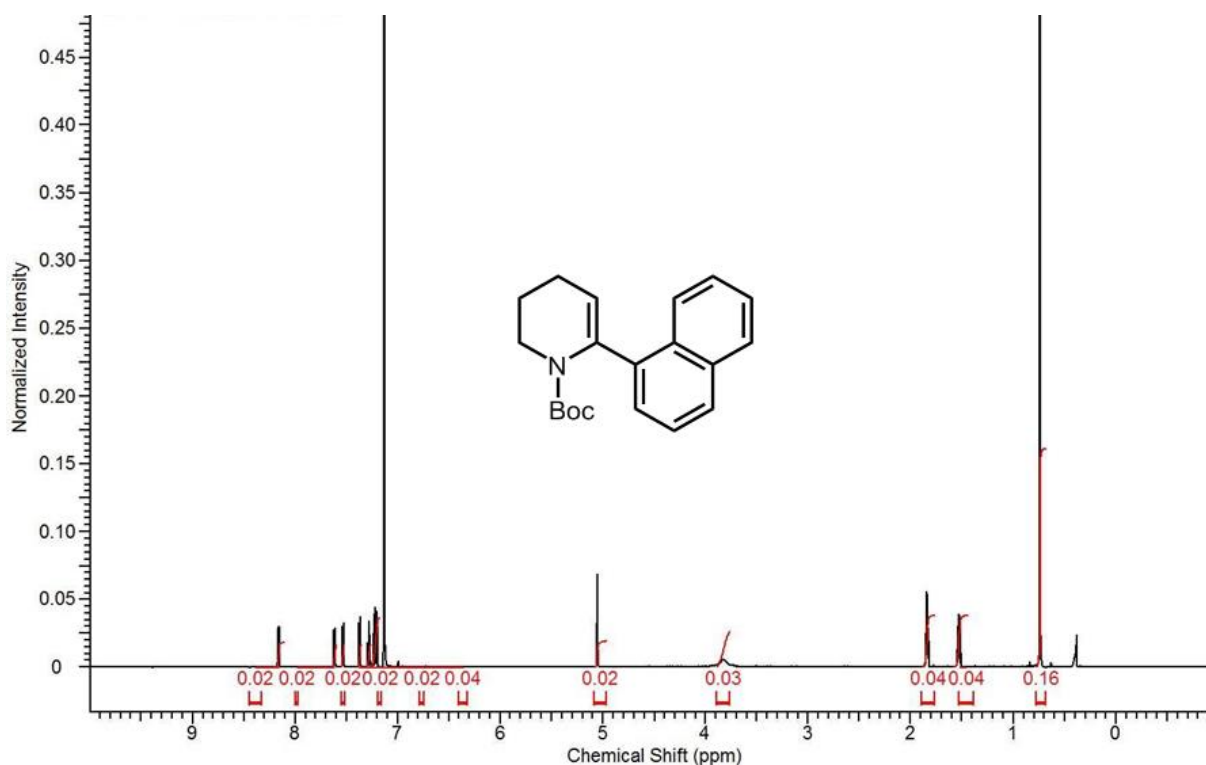

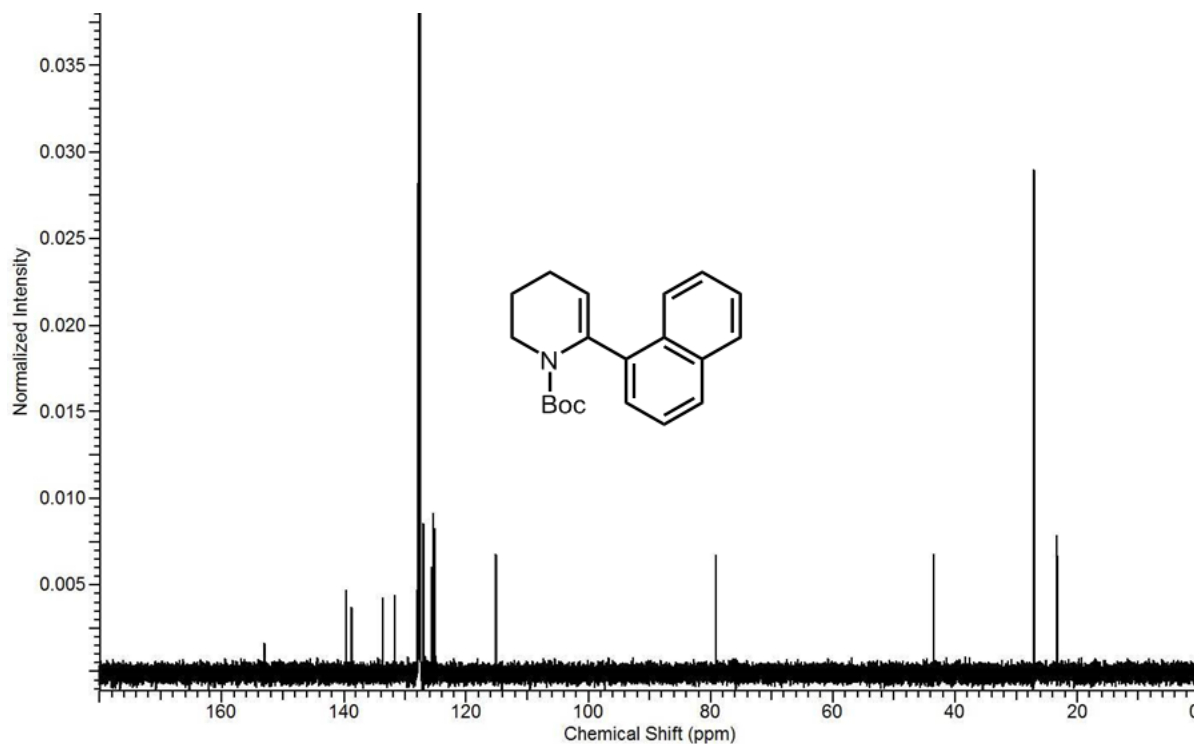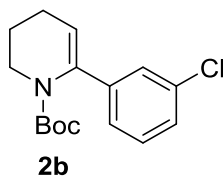

Prepared from **1a** (371 mg, 1.0 mmol) and 3-chlorophenylmagnesium bromide (3 equiv) using **General Procedure D**. Temp = 50 °C, time = 22 h. Purification: Flash chromatography on silica (pretreated with 1% Et<sub>3</sub>N) eluting with PE/DCM (1:1). Yield = 229 mg; 78%. <sup>1</sup>H NMR (400 MHz, C<sub>6</sub>D<sub>6</sub>) δ 7.22 (1H, s), 7.18 to 6.96 (2H, m), 6.80 to 6.71 (1H, t), 5.14 to 5.12 (1H, t), 3.68 to 3.66 (2H, dd), 1.82 to 1.78 (2H, m), 1.52 to 1.46 (2H, m), 1.14 (9H, s). <sup>13</sup>C NMR (101 MHz, C<sub>6</sub>D<sub>6</sub>) δ 153.3, 143.3, 139.2, 133.8, 129.0, 126.5, 125.8, 123.5, 115.2, 79.8, 44.0, 27.4, 23.4, 23.1. HRMS calc for C<sub>16</sub>H<sub>20</sub>ClNO<sub>2</sub> 293.1183, found 293.1178.

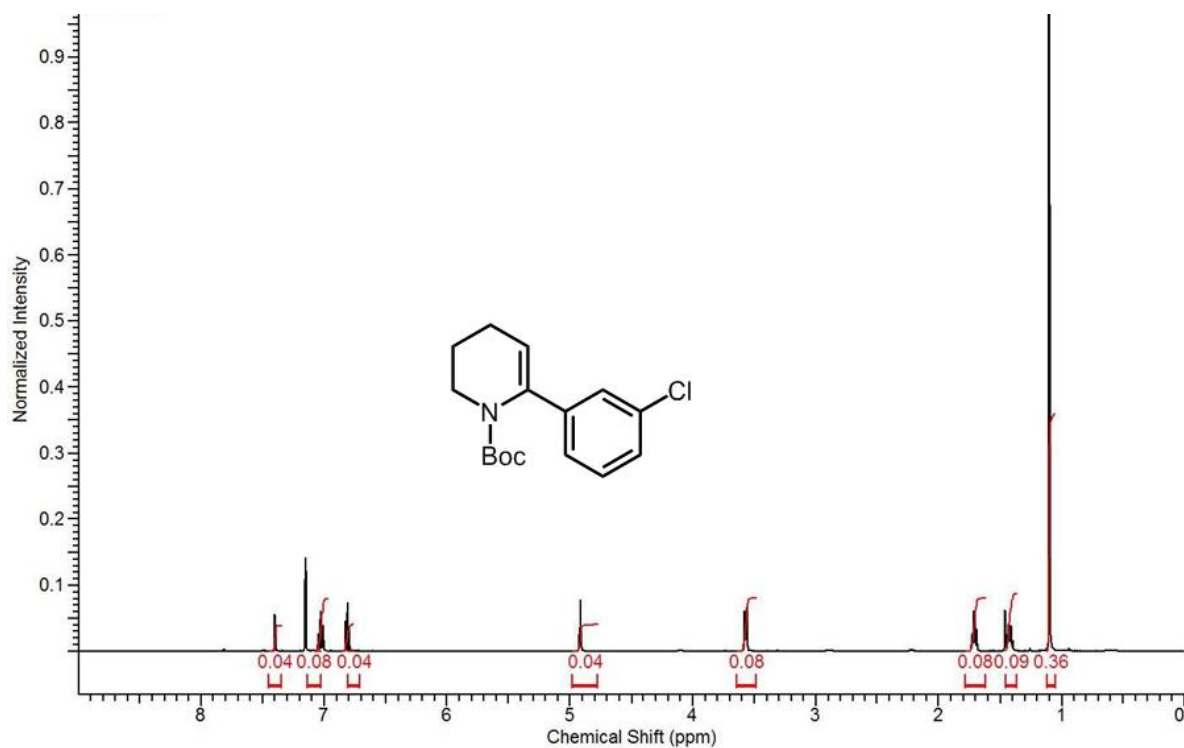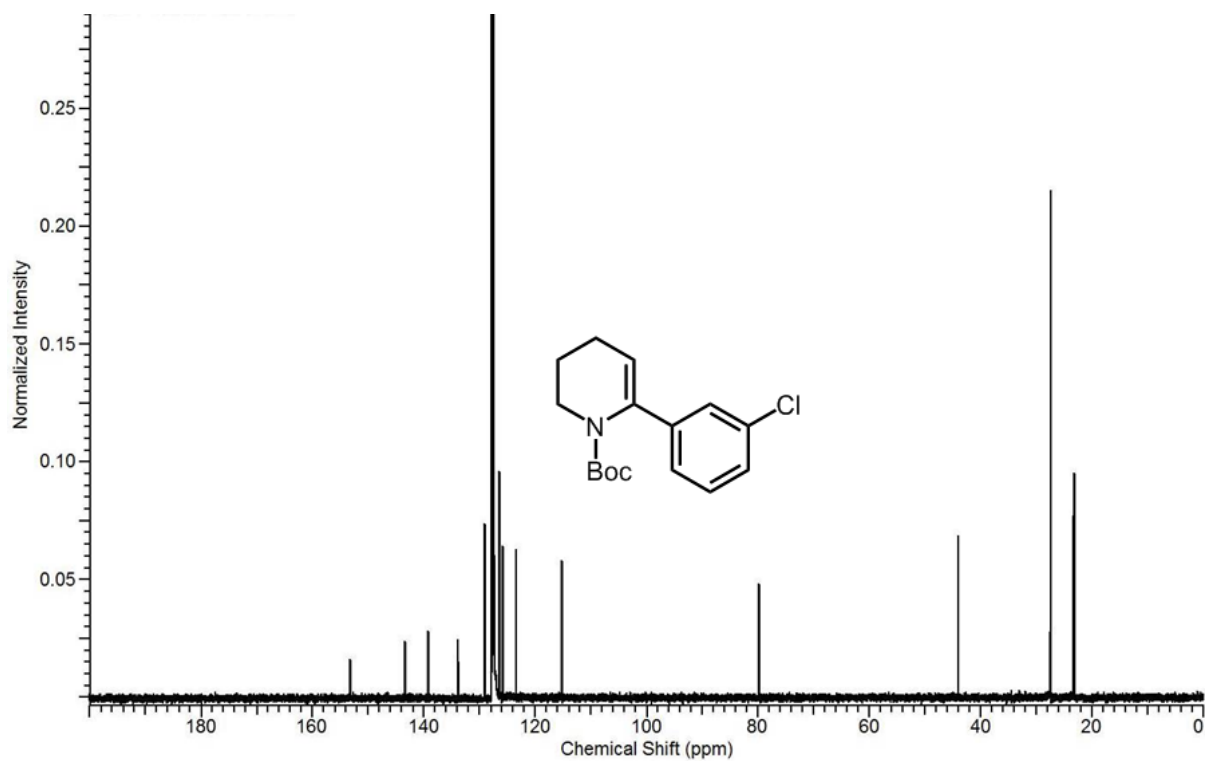

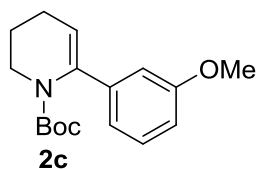

Prepared from **1a** (371 mg, 1.0 mmol) and 3-methoxyphenylmagnesium bromide (3 equiv) using **General Procedure D**. Purification: Flash chromatography on silica (pretreated with 1% Et<sub>3</sub>N) eluting with PE/DCM (1:1). Yield = 237 mg; 82%. <sup>1</sup>H NMR (400 MHz, C<sub>6</sub>D<sub>6</sub>) δ 7.22 (1H, s), 7.18 to 6.96 (2H, m), 6.80 to 6.71 (2H, t), 5.14 to 5.12 (1H, t), 3.68 to 3.66 (2H, dd), 3.34 (3H, s), 1.82 to 1.78 (2H, m), 1.52 to 1.46 (2H, m), 1.14 (9H, s). <sup>13</sup>C NMR (101 MHz, C<sub>6</sub>D<sub>6</sub>) δ 160.3, 153.7, 142.9, 140.5, 129.7, 119.6, 112.9, 112.9, 112.4, 79.5, 54.4, 44.2, 27.5, 23.4, 23.4. HRMS calc for C<sub>17</sub>H<sub>23</sub>NO<sub>3</sub> 289.1678, found 289.1600.

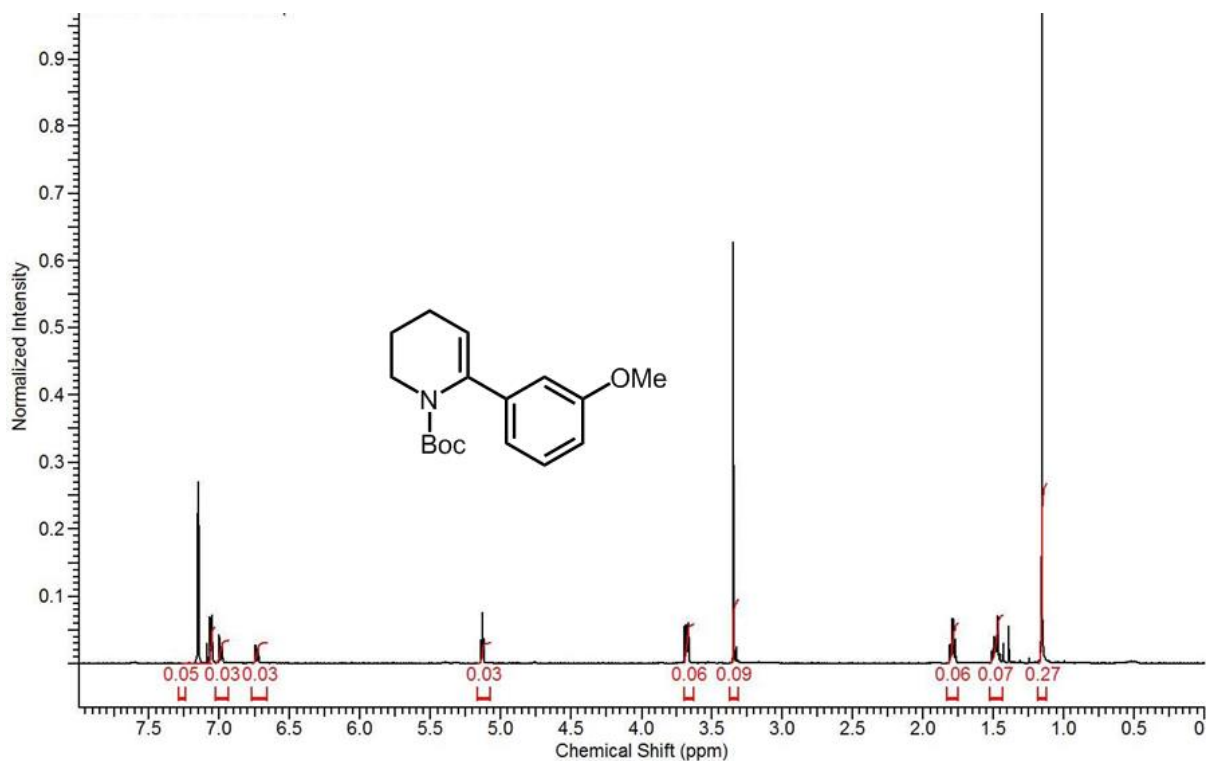

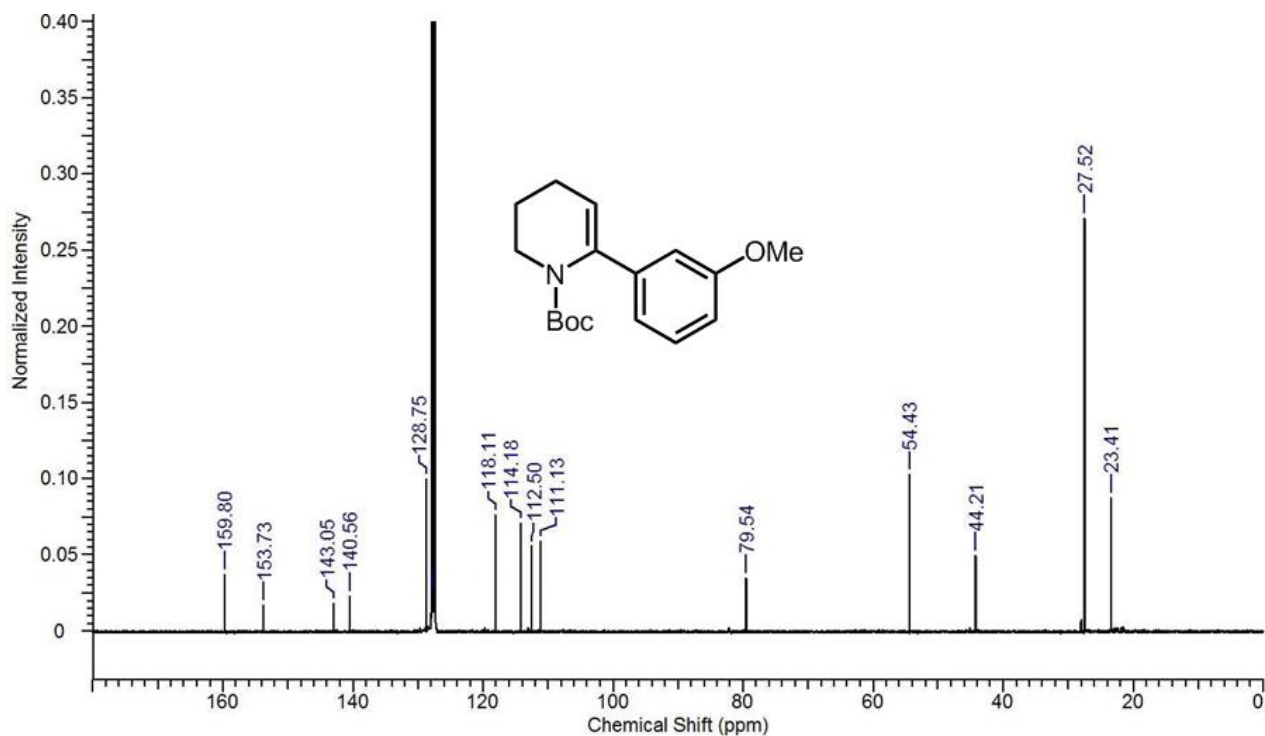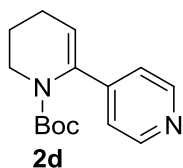

Prepared from **1a** (371 mg, 0.10 mmol) and 4-pyridylmagnesium bromide (3 equiv) using **General Procedure D**. Purification: Flash chromatography on silica (pretreated with 1% Et<sub>3</sub>N) eluting with DCM/MeOH (95:5). Yield = 146 mg; 56%. <sup>1</sup>H NMR (400 MHz, C<sub>6</sub>D<sub>6</sub>) δ 8.56 to 8.55 (2H), 6.92 to 6.90 (2H), 4.99 to 4.97 (1H), 3.56 to 3.53 (2H), 1.71 to 1.66 (2H), 1.45 to 1.37 (2H), 1.07 (9H). <sup>13</sup>C NMR (101 MHz, C<sub>6</sub>D<sub>6</sub>) δ 153.1, 149.8, 148.1, 138.6, 119.9, 116.9, 80.2, 43.9, 27.4, 23.4, 23.0. HRMS calc for C<sub>15</sub>H<sub>20</sub>N<sub>2</sub>O<sub>2</sub> 260.1525, found 260.1521.

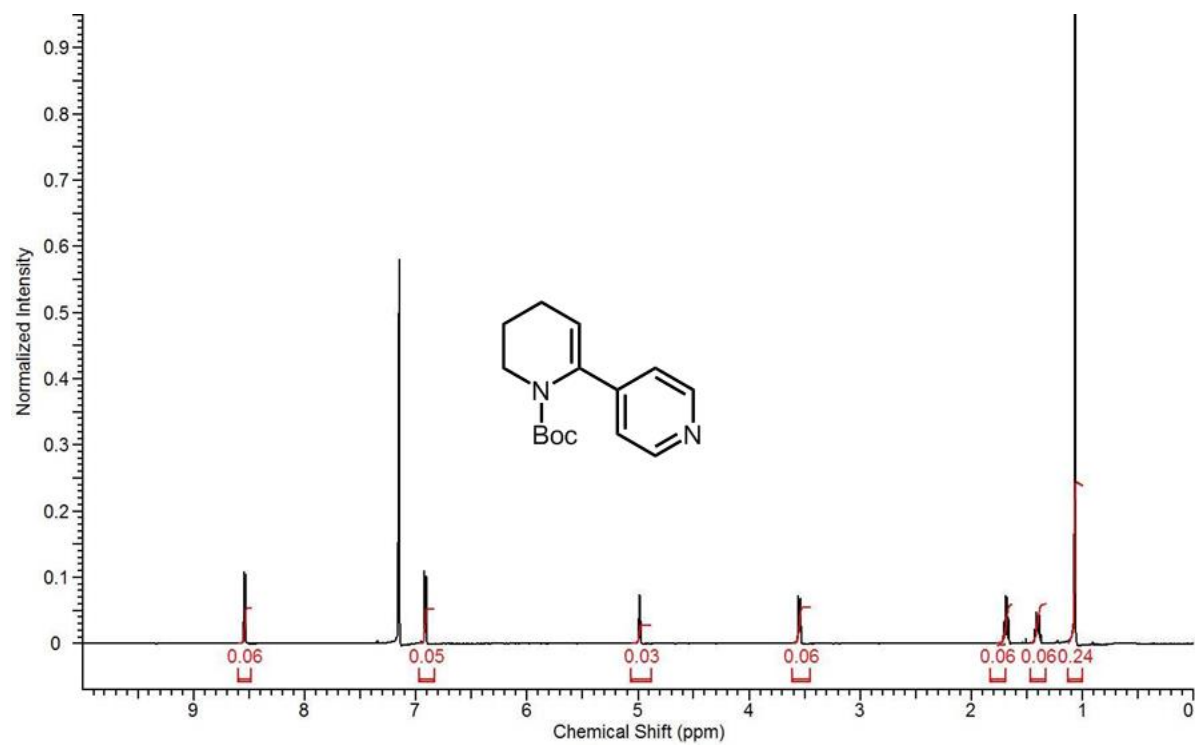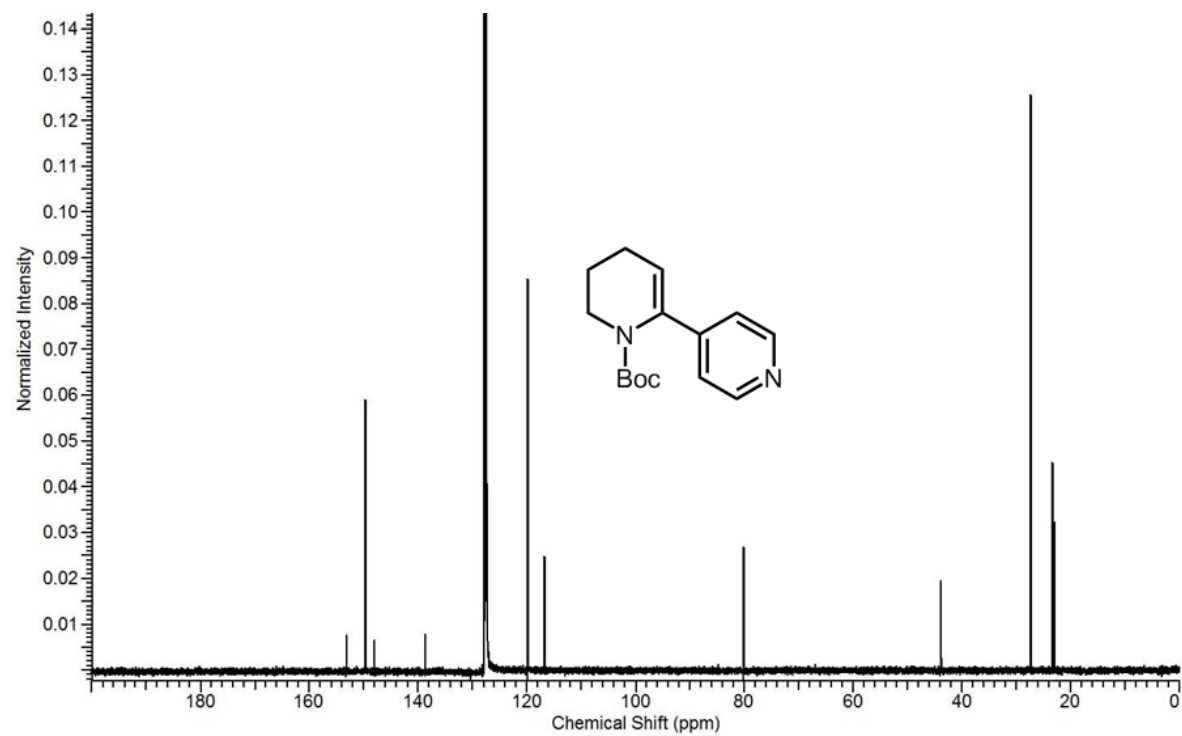



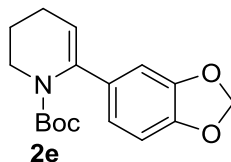

Prepared from **1a** (371 mg, 1 mmol) and 5-benzo[*d*][1,3]dioxolylmagnesium bromide (3 equiv) using **General Procedure D**. Purification: Flash chromatography on silica (pretreated with 1% Et<sub>3</sub>N) eluting with PE/DCM (1:3). Yield = 256 mg; 85%. <sup>1</sup>H NMR (400 MHz, C<sub>6</sub>D<sub>6</sub>) δ 6.94 (1H), 6.79 to 6.63 (1H), 5.33 (1H), 5.02 to 5.00 (2H), 3.65 to 3.62 (2H), 1.80 to 1.76 (2H), 1.52 to 1.19 (11H). <sup>13</sup>C NMR (101 MHz, C<sub>6</sub>D<sub>6</sub>) δ 154.4, 148.3, 147.3, 140.9, 136.1, 119.5, 114.0, 109.1, 107.1, 101.3, 80.1, 44.9, 28.3, 24.1, 24.1. HRMS calc for C<sub>17</sub>H<sub>21</sub>NO<sub>4</sub> 303.1471, found 303.1466.

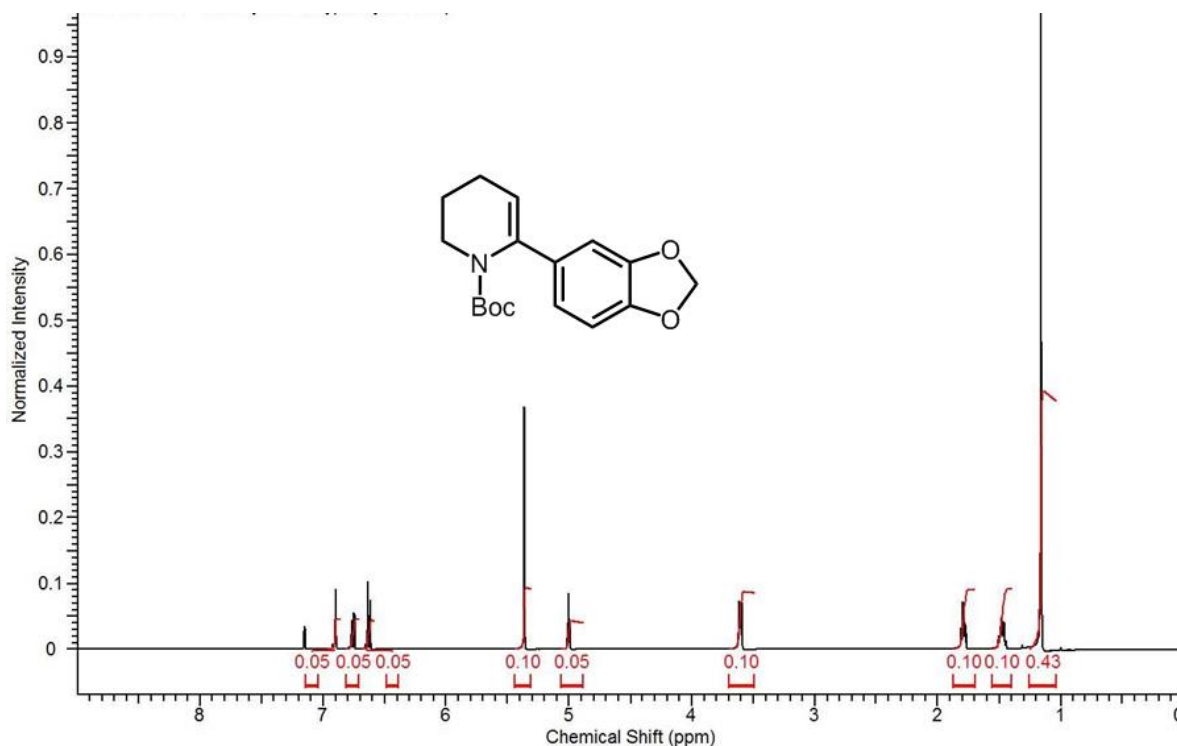

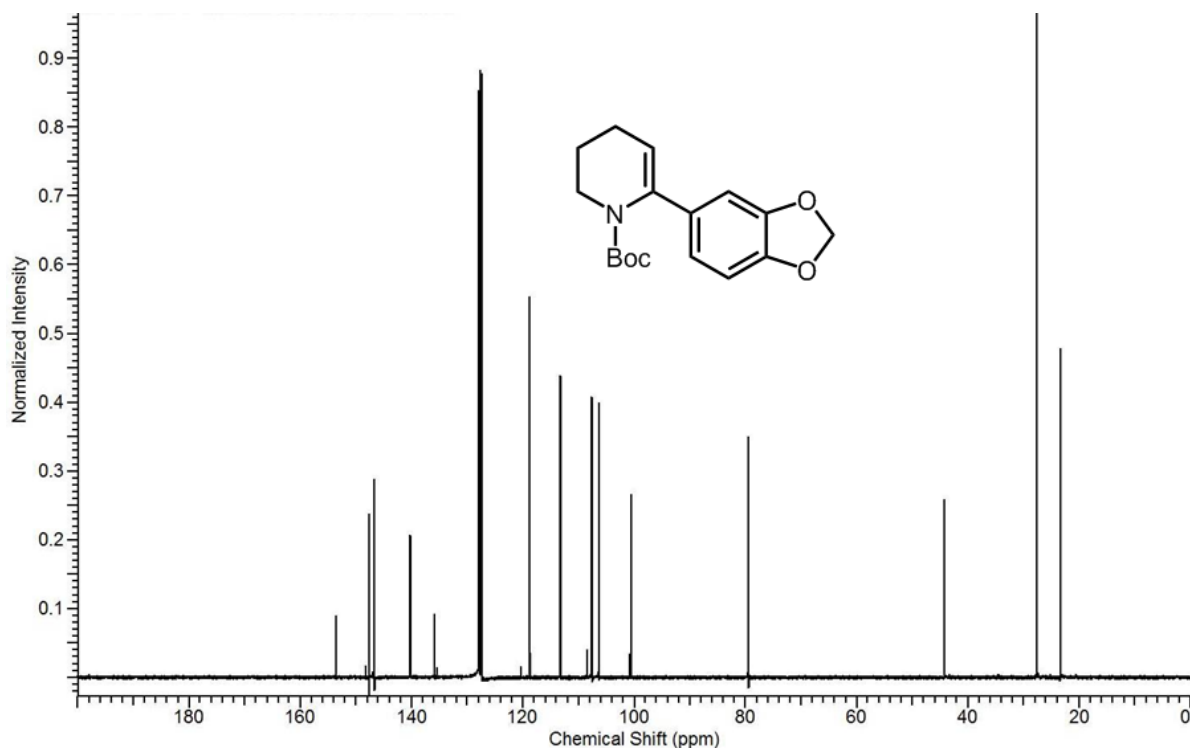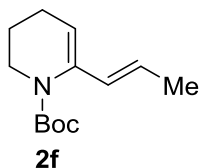

Prepared from **1a** (371 mg, 1 mmol) and 1-propenylmagnesium bromide (3 equiv) using **General Procedure D**. Purification: Flash chromatography on silica (pretreated with 1% Et<sub>3</sub>N) eluting with PE/DCM (2:1). Yield = 150 mg; 67%. Data as reported by us.<sup>1</sup>

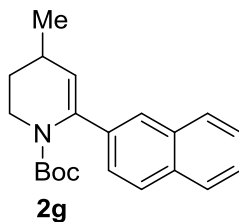

Prepared from **1b** (385 mg, 1 mmol) and 2-naphthylmagnesium bromide (3 equiv) using **General Procedure D**. Purification: Flash chromatography on silica (pretreated with 1% Et<sub>3</sub>N). PE/DCM (2:1). Yield = 258.5 mg; 80%. <sup>1</sup>H NMR (400 MHz, C<sub>6</sub>D<sub>6</sub>, mixture of rotamers) δ 8.03 to 7.84 (1H), 7.76 to 7.21 (6H), 5.17 & 5.16 (1H), 3.81 to 3.76 (2H), 2.16 to 2.09 (1H), 1.74 to

1.66 (1H), 1.52 to 0.98 (11H), 0.82 to 0.65 (3H).  $^{13}\text{C}$  NMR (101 MHz,  $\text{C}_6\text{D}_6$ )  $\delta$  153.6, 139.5, 138.8, 133.6, 132.8, 127.8, 127.6, 127.2, 126.0, 125.4, 124.7, 123.9, 120.7, 79.7, 42.9, 31.6, 29.0, 27.4, 21.1. HRMS calc for  $\text{C}_{21}\text{H}_{25}\text{NO}_2$  323.1885, found 323.1879. Data as reported by us.<sup>1</sup>

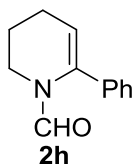

Prepared from **1c** (299 mg, 1 mmol) and  $\text{PhMgBr}$  (3 equiv) using **General Procedure D**,  $T = 23^\circ\text{C}$ , time = 4 h; Purification: Flash chromatography on silica (pretreated with 1%  $\text{Et}_3\text{N}$ ) eluting with hexane/ $\text{EtOAc}$  (70:30). Yield = 150 mg, 80%. Data as reported by us.<sup>1</sup>

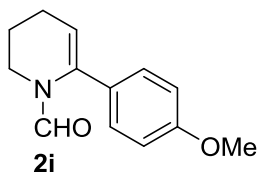

Prepared from **1c** (299 mg, 1 mmol) and 4-methoxyphenylmagnesium bromide (3 equiv) using **General Procedure D**. Purification: Flash chromatography on silica (pretreated with 1%  $\text{Et}_3\text{N}$ ) eluting with hexane/ $\text{EtOAc}$  (50:50). Yield = 173.6 mg, 80%. Data as reported.<sup>1</sup>

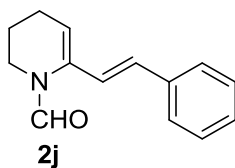

Prepared from **1c** (299 mg, 1 mmol) and  $\beta$ -styrenyl magnesium bromide (3 equiv) using General Procedure D. Purification: Flash chromatography on silica (pretreated with 1%  $\text{Et}_3\text{N}$ ) eluting with hexane/ $\text{EtOAc}$  (70:30). Yield = 151 mg, 71%. Data as reported.<sup>1</sup>

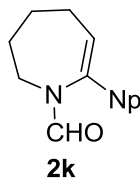

Prepared from **1d** (313 mg, 1 mmol) and 1-naphthylmagnesium bromide (3 equiv) using **Procedure D**. Time = 6 h. Purification: Flash chromatography on silica (pretreated with 1% Et<sub>3</sub>N) eluting with hexane/EtOAc (70:30). Yield = 189 mg, 75%. Data as reported.<sup>2</sup>

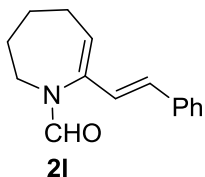

Prepared from **1d** (313 mg, 1 mmol) and β-styrenylmagnesium bromide (3 equiv) using **Procedure D**. Time = 8 h. Purification: Flash chromatography on silica (pretreated with 1% Et<sub>3</sub>N) eluting with hexane/EtOAc (90:10). Yield = 177 mg, 78%. Data as reported by us.<sup>2</sup>

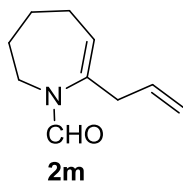

Prepared from **1d** (313 mg, 1 mmol) and allylmagnesium bromide (3.0 mL, 1.0 M in Et<sub>2</sub>O, 3 equiv) using **Procedure D**. Time = 16 h. Purification: Flash chromatography on silica (pretreated with 1% Et<sub>3</sub>N) eluting with hexane/EtOAc (90:10). Yield = 88 mg; 53%. <sup>1</sup>H NMR (400 MHz, C<sub>6</sub>D<sub>6</sub>) δ 8.92 (1H, s), 5.68 to 5.58 (2H, m), 4.85 to 4.68 (2H, dd), 3.44 to 3.35 (4H, m), 1.64 to 1.58 (2H, m), 1.35 to 1.29 (2H, m), 1.12 to 1.06 (2H, m). <sup>13</sup>C NMR (101 MHz, C<sub>6</sub>D<sub>6</sub>) δ 161.0, 134.1, 129.7, 125.7, 118.2, 43.6, 32.2, 27.6, 27.1, 23.8. HRMS calc for C<sub>10</sub>H<sub>15</sub>NO 165.1154, found 165.1158.

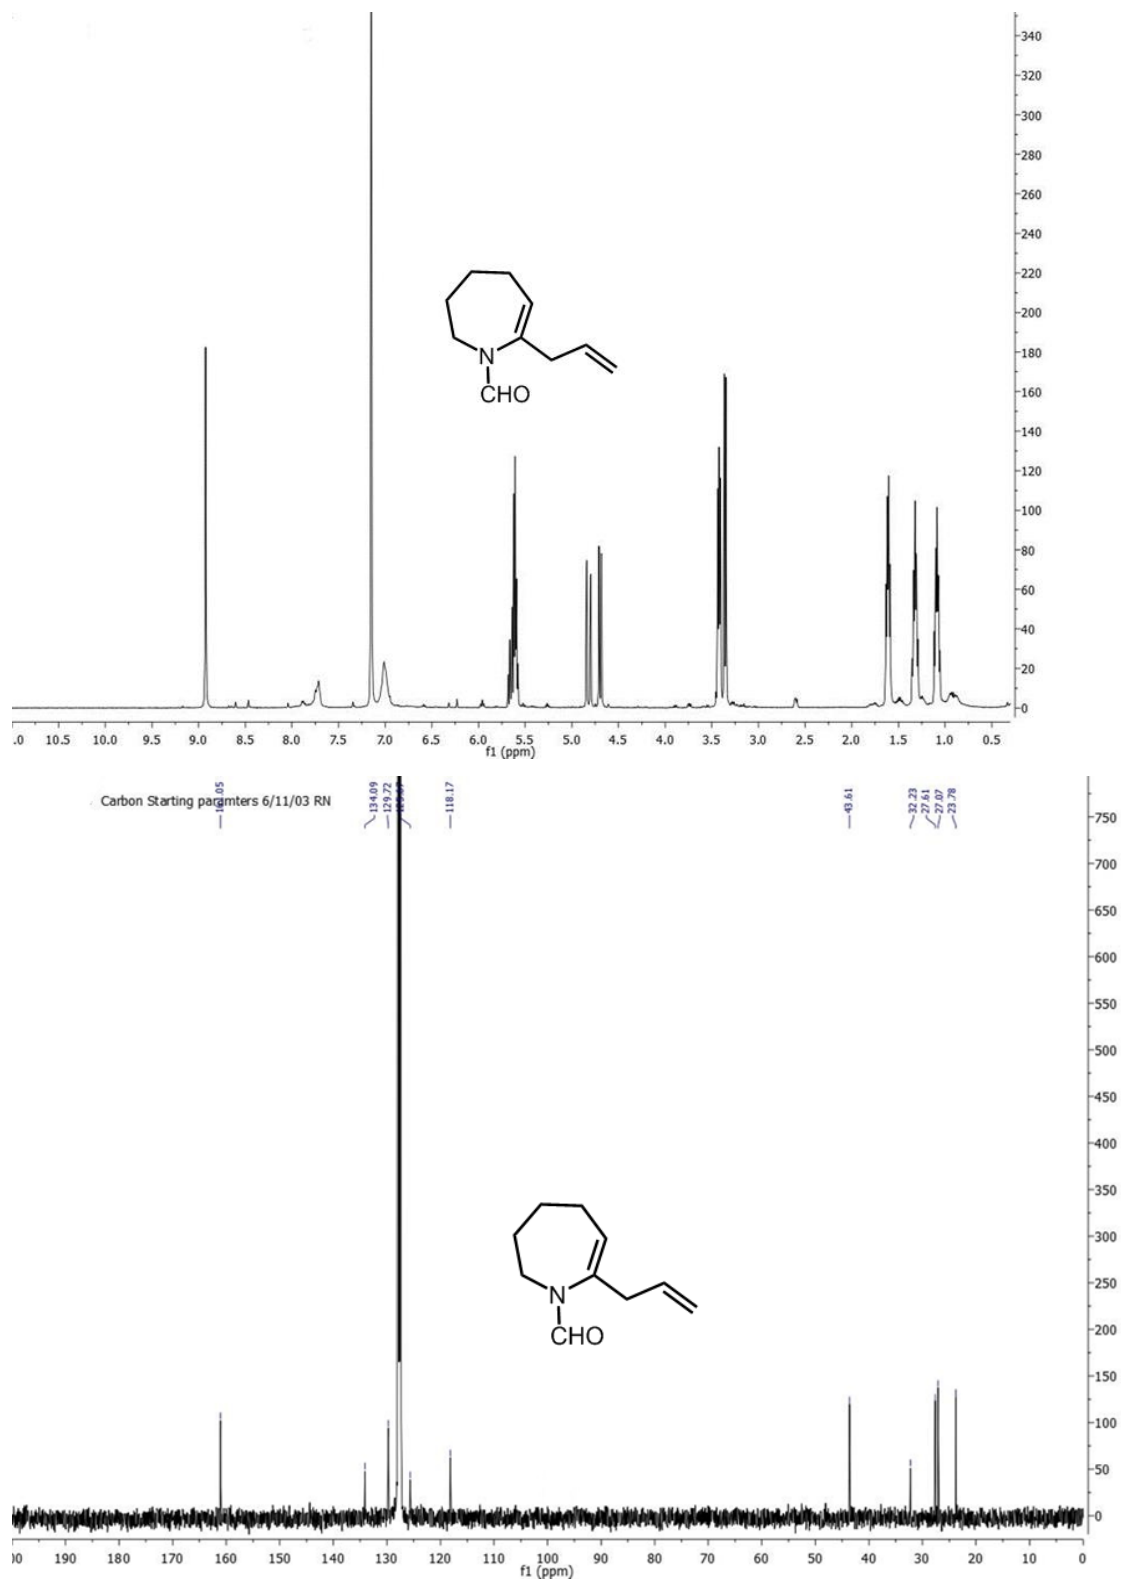

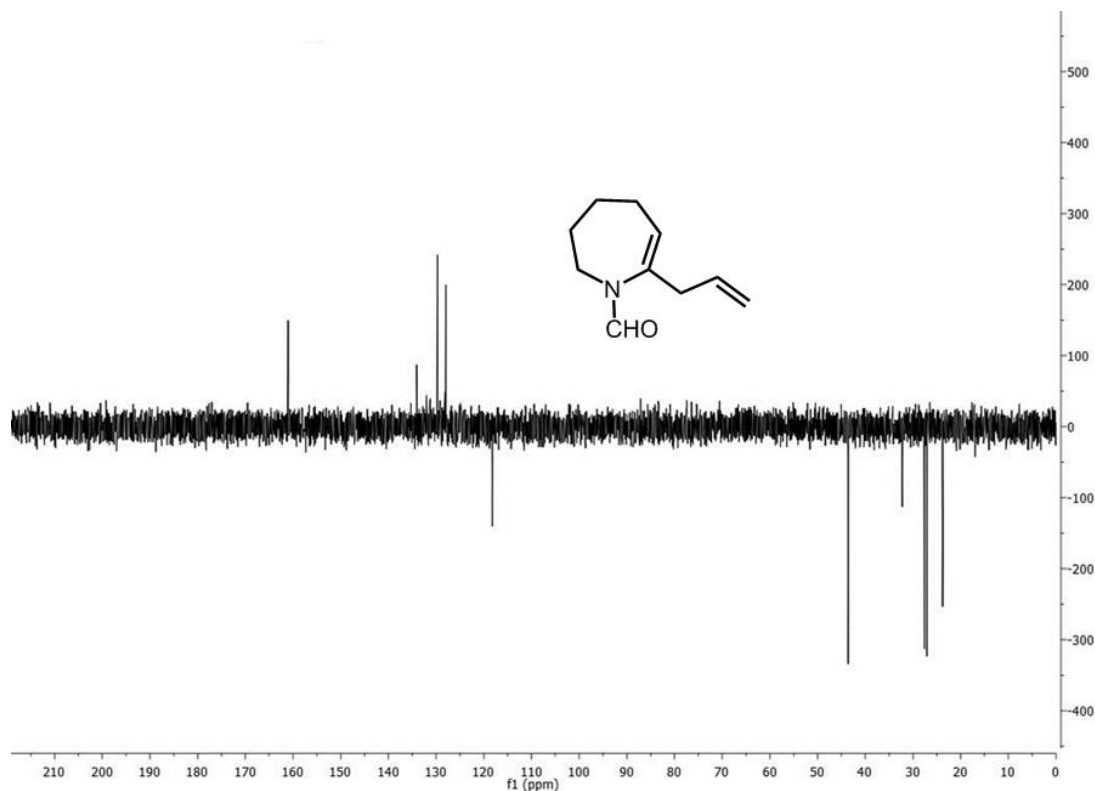

#### 4. Preparation of $\alpha$ -selenonyl- $\beta$ -heterofunctionalized dehydropiperidines and azepenes

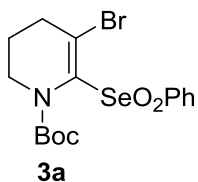

Prepared from **1a** (371 mg, 1 mmol), and C<sub>2</sub>F<sub>4</sub>Br<sub>2</sub> (516 mg, 2 equiv) using **General Procedure E**. Purification: Flash chromatography on silica (pretreated with 1% Et<sub>3</sub>N) eluting with hexane:EtOAc (95:5). Yield = 391 mg; 87%. <sup>1</sup>H NMR (400 MHz, C<sub>6</sub>D<sub>6</sub>)  $\delta$  7.34 (1H, d), 7.03, to 6.90 (4H, m), 3.52 to 3.49 (2H, dd), 1.67 to 1.21 (13H, m). <sup>13</sup>C NMR (101 MHz, C<sub>6</sub>D<sub>6</sub>)  $\delta$  152.9, 132.4, 128.9, 128.3, 123.9, 122.9, 121.9, 81.9, 80.3, 74.6, 43.2, 28.1, 23.4, 22.4. HRMS calc for C<sub>16</sub>H<sub>20</sub>BrNO<sub>4</sub>Se 448.9741, found 448.9745.

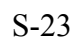

AVB-400 ZBO Proton starting parameters. 6/11/03 RN

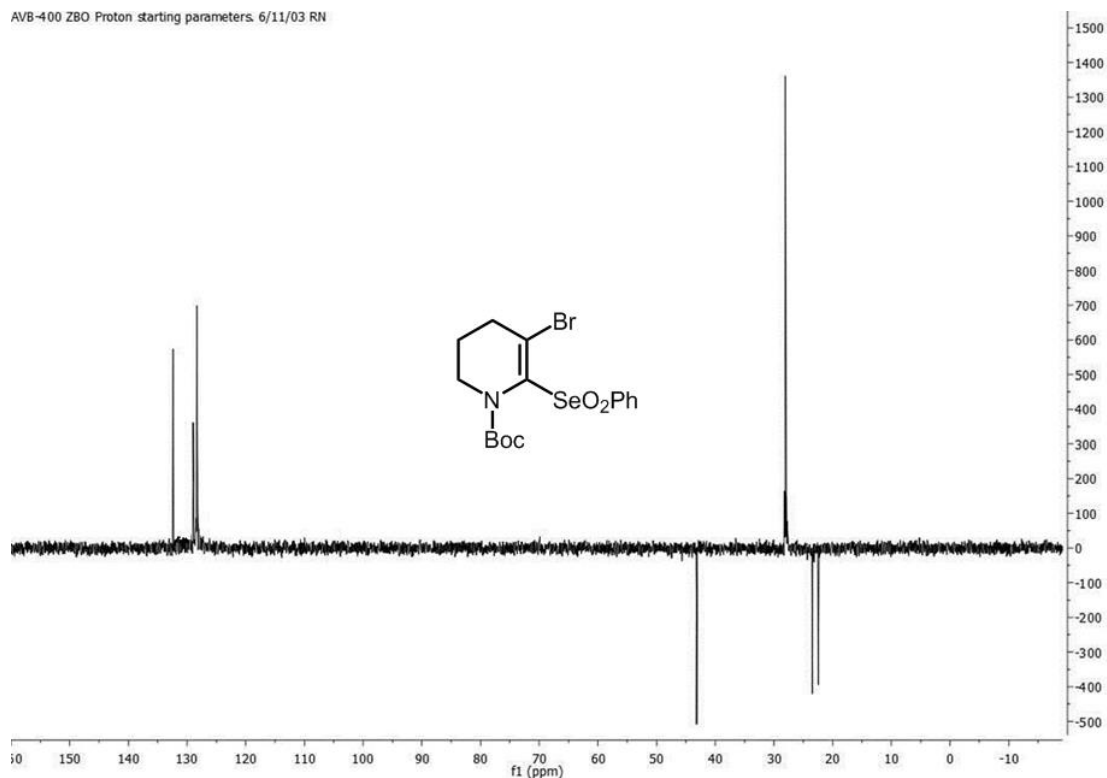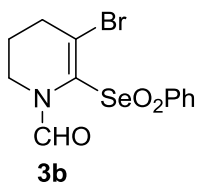

Prepared from **1c** (299 mg, 1 mmol), and  $\text{C}_2\text{F}_4\text{Br}_2$  (516 mg, 2 equiv) using **General Procedure E**. Purification: Flash chromatography on silica (pretreated with 1%  $\text{Et}_3\text{N}$ ) eluting with hexane:EtOAc (80:20). Yield = 196 mg; 52%.  $^1\text{H}$  NMR (400 MHz,  $\text{C}_6\text{D}_6$ )  $\delta$  9.35 (1H, s), 7.28 to 7.21 (2H, m), 7.00 to 6.93 (3H, m), 3.46 to 3.43 (2H, dd), 1.60 to 1.52 (2H, m), 1.20 to 1.14 (2H, m).  $^{13}\text{C}$  NMR (101 MHz,  $\text{C}_6\text{D}_6$ )  $\delta$  160.4, 138.5, 136.9, 128.5, 128.0, 127.8, 111.4, 39.0, 22.9, 21.9. HRMS calc for  $\text{C}_{12}\text{H}_{12}\text{BrNO}_3\text{Se}$  376.9166, found 376.9162.



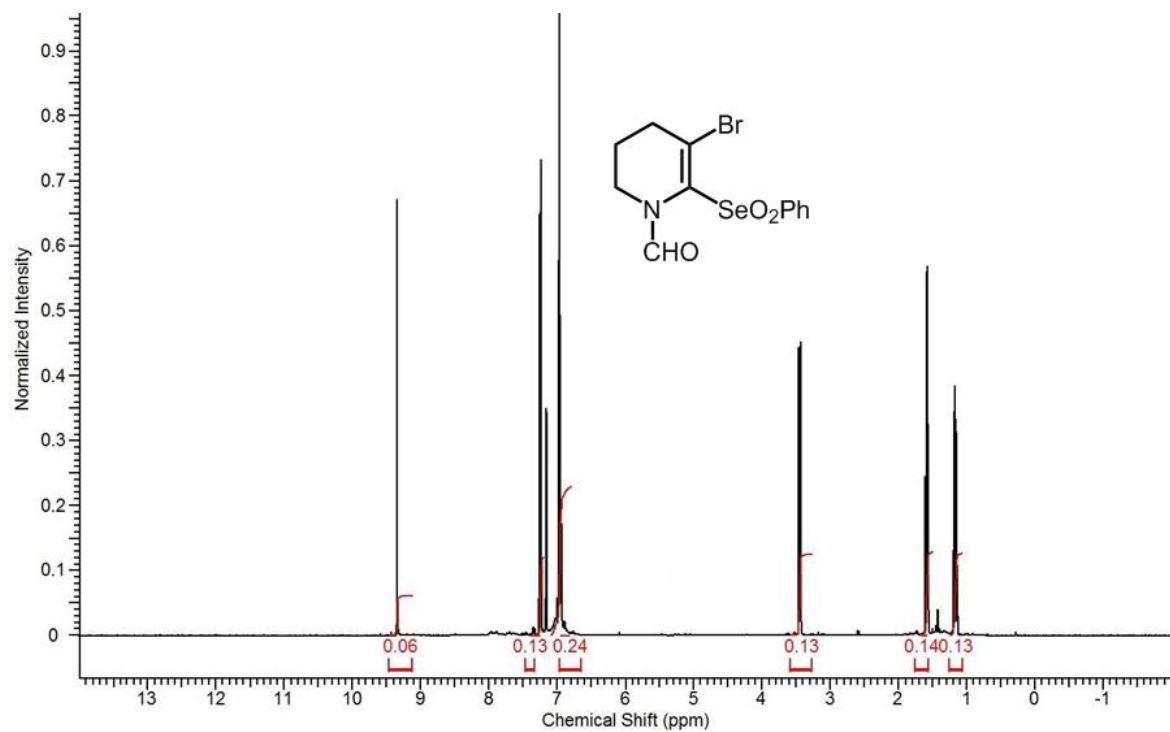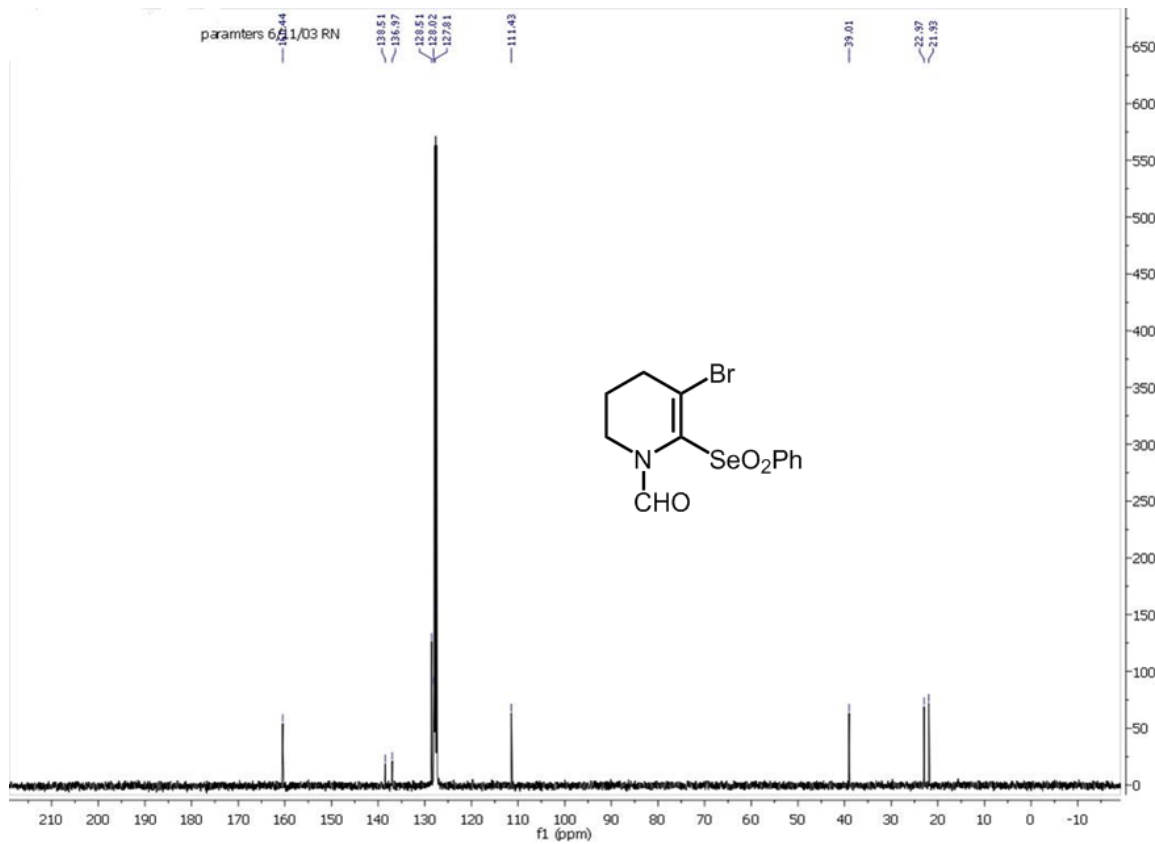

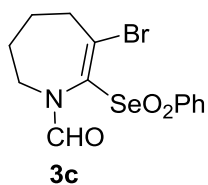

Prepared from **1d** (313 mg, 1 mmol), and C<sub>2</sub>F<sub>4</sub>Br<sub>2</sub> (516 mg, 2 equiv) using **General Procedure E**. Purification: Flash chromatography on silica (pretreated with 1% Et<sub>3</sub>N) eluting with hexane:EtOAc (80:20). Yield = 188 mg; 48%. <sup>1</sup>H NMR (400 MHz, C<sub>6</sub>D<sub>6</sub>) δ 8.94 (1H, s), 7.31 to 7.26 (2H, m), 6.96 to 6.90 (3H, m), 3.52 to 3.50 (2H, dd), 1.72 to 1.68 (2H, m), 1.42 to 1.36 (2H, m), 1.18 to 1.12 (2H, m). <sup>13</sup>C NMR (101 MHz, C<sub>6</sub>D<sub>6</sub>) δ 161.9, 133.1, 132.1, 130.1, 129.7, 126.3, 123.0, 44.4, 28.4, 27.9, 24.6. HRMS calc for C<sub>13</sub>H<sub>14</sub>BrNO<sub>3</sub>Se 390.9322, found 390.9326.

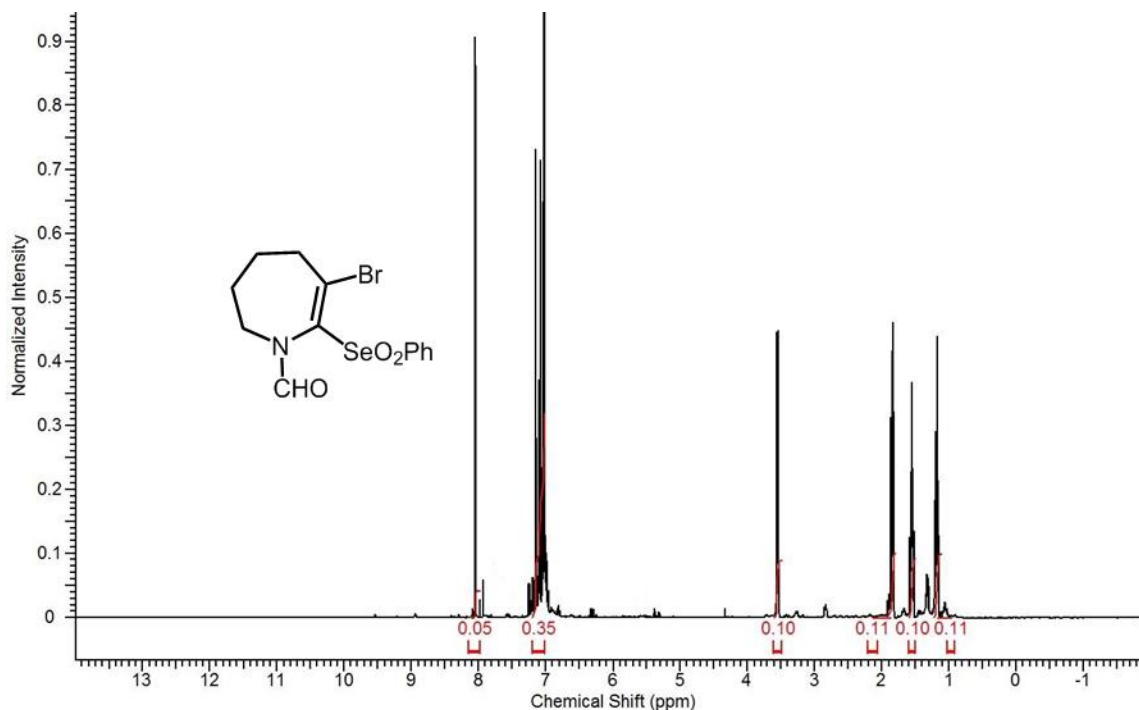

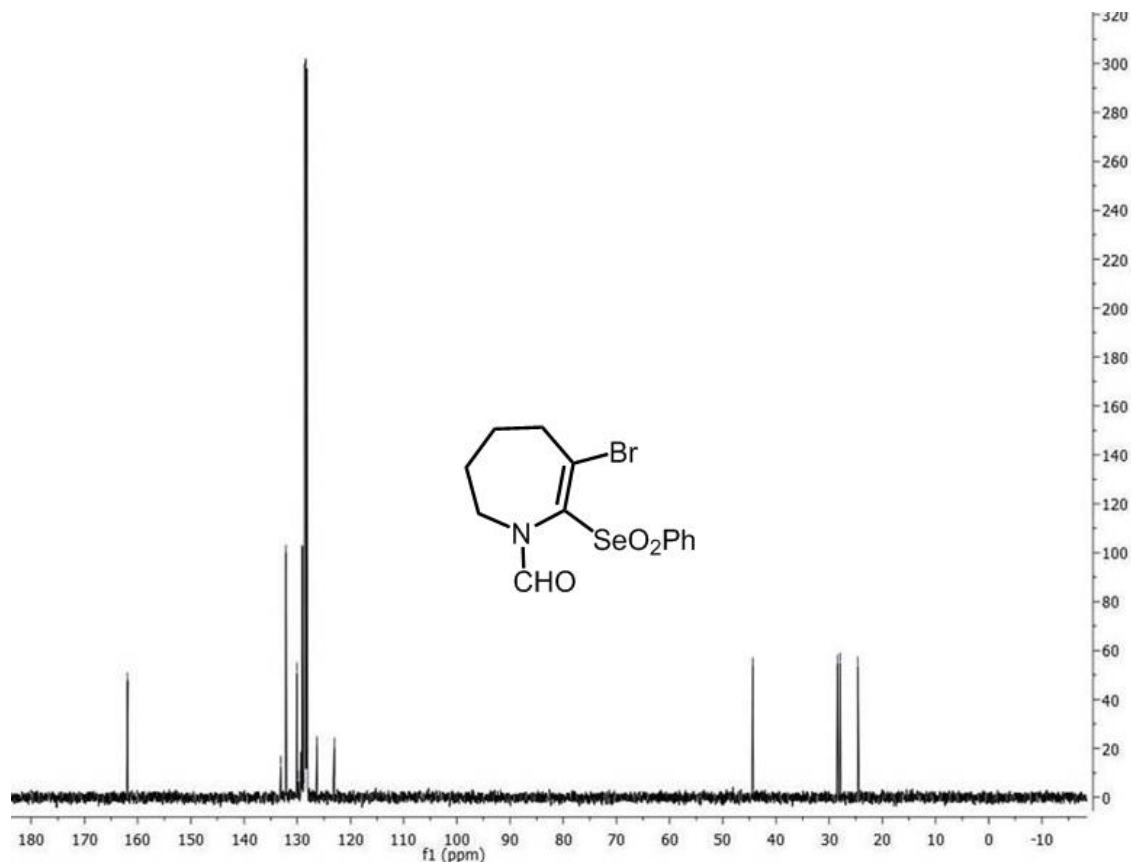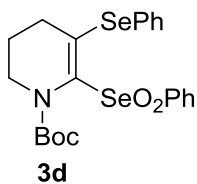

Prepared from **1a** (371 mg, 1 mmol) and PhSeSePh (628 mg, 2 equiv) using **General Procedure E**. Purification: Flash chromatography on silica (pretreated with 1% Et<sub>3</sub>N) eluting with hexane:EtOAc (95:5). Yield = 406 mg; 77%. <sup>1</sup>H NMR (400 MHz, C<sub>6</sub>D<sub>6</sub>) δ 7.39 (1H, d), 7.32 to 7.06 (9H, m), 3.70 to 3.67 (2H, dd), 1.82 to 1.78 (2H, m), 1.52 to 1.39 (2H, m), 1.12 (9H, s). <sup>13</sup>C NMR (101 MHz, C<sub>6</sub>D<sub>6</sub>) δ 154.3, 142.1, 141.2, 129.4, 127.8, 127.3, 126.1, 114.9, 80.2, 44.8, 28.1, 24.1, 24.1. HRMS calc for C<sub>22</sub>H<sub>25</sub>NO<sub>4</sub>Se<sub>2</sub> 527.0114, found 527.0117.

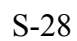

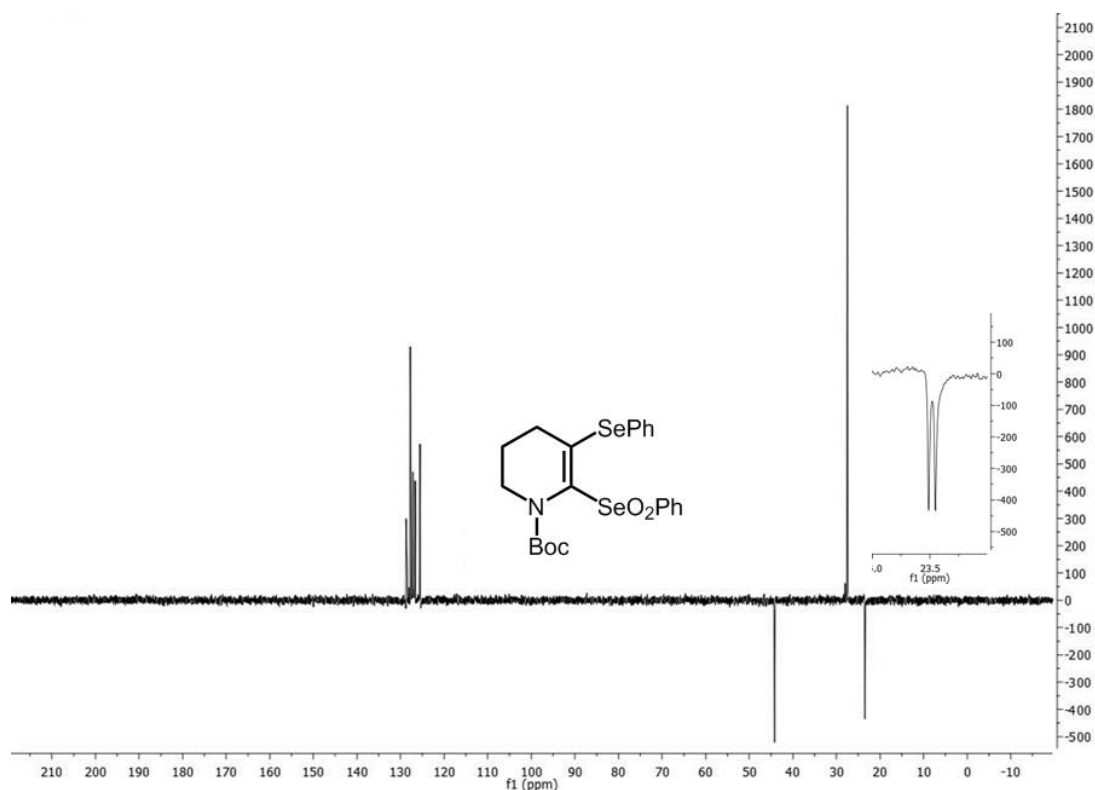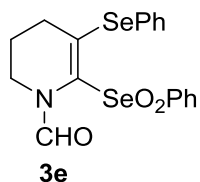

Prepared from **1c** (299 mg, 1 mmol) and PhSeSePh (628 mg, 2 equiv) using **General Procedure E**. Purification: Flash chromatography on silica (pretreated with 1% Et<sub>3</sub>N) eluting with hexane:EtOAc (80:20). Yield = 273 mg; 60%. <sup>1</sup>H NMR (400 MHz, CHLOROFORM-*D*) δ 8.78 (1H, s), 7.43 to 7.22 (10H, m), 3.64 to 3.61 (2H, dd), 2.08 to 2.04 (2H, m), 1.69 to 1.63 (2H, m). <sup>13</sup>C NMR (101 MHz, CDCl<sub>3</sub>) δ 159.8, 132.5, 132.4, 132.1, 132.0, 131.9, 131.9, 131.5, 129.3, 129.0, 128.7, 128.5, 128.5, 125.1, 121.7, 109.5, 41.2, 23.8, 21.1. HRMS calc for C<sub>18</sub>H<sub>17</sub>NO<sub>3</sub>Se<sub>2</sub> 454.9539, found 454.9544.

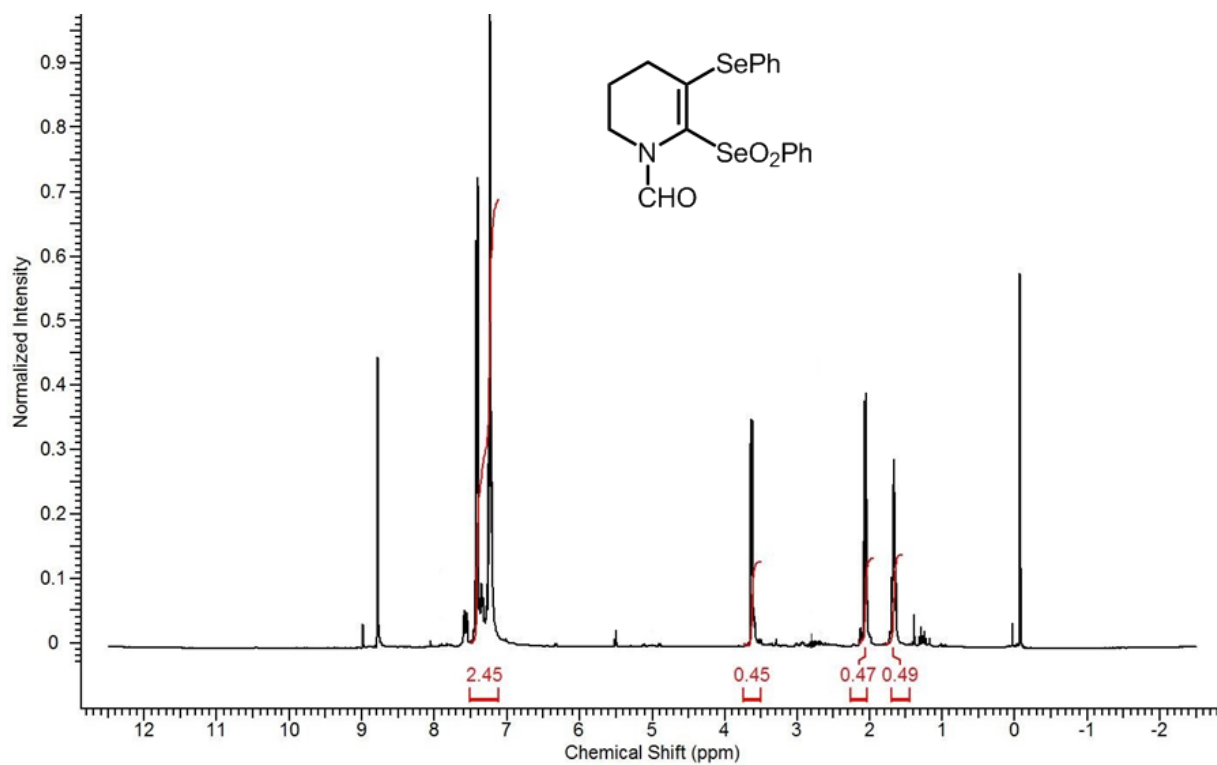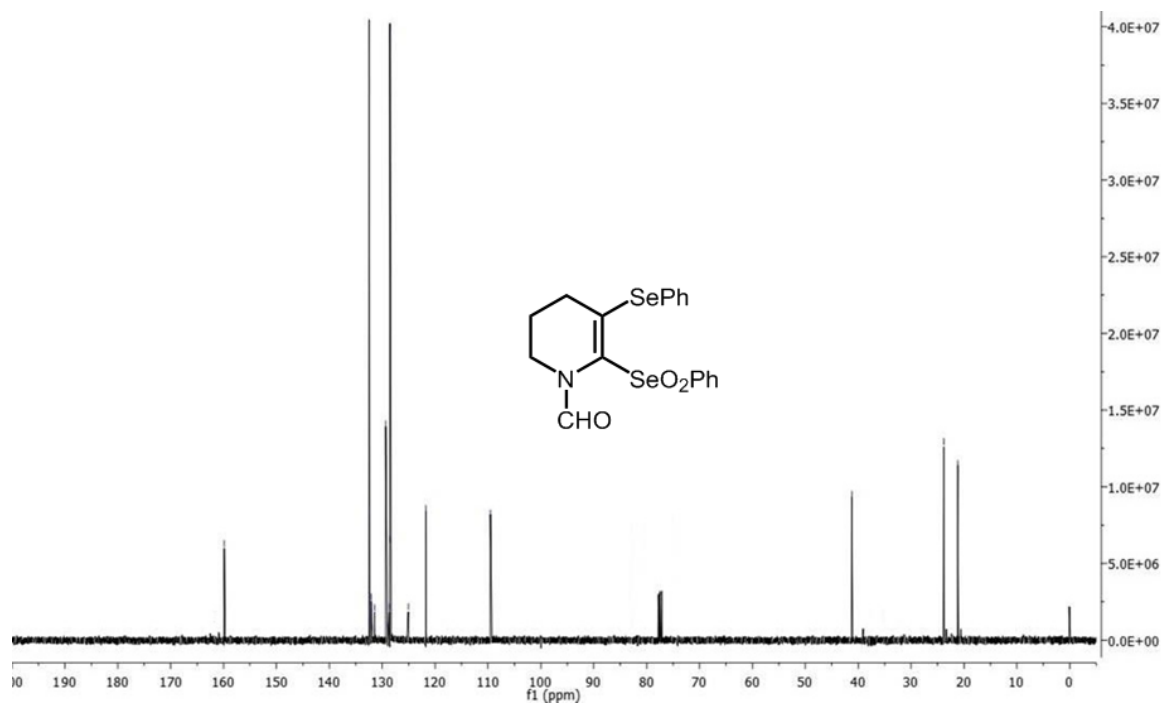

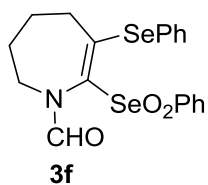

Prepared from **1d** (313 mg, 1 mmol) and PhSeSePh (628 mg, 2 equiv) using **General Procedure E**. Purification: Flash chromatography on silica (pretreated with 1% Et<sub>3</sub>N) eluting with hexane:EtOAc (80:20). Yield = 296 mg; 63%. <sup>1</sup>H NMR (400 MHz, C<sub>6</sub>D<sub>6</sub>) δ 8.07 (1H, s), 7.91 to 7.86 (1H, d), 7.61 to 7.09 (10H, m), 3.92 to 3.86 (2H, dd), 1.97 to 1.91 (2H, m), 1.67 to 1.61 (2H, m), 1.46 to 1.40 (2H, m). <sup>13</sup>C NMR (101 MHz, C<sub>6</sub>D<sub>6</sub>) δ 161.7, 141.4, 136.5, 134.0, 131.2, 129.0, 128.6, 126.6, 125.9, 125.2, 124.9, 122.2, 44.8, 27.4, 27.1, 24.2. HRMS calc for C<sub>19</sub>H<sub>19</sub>NO<sub>3</sub>Se<sub>2</sub> 468.9695, found 468.9699.

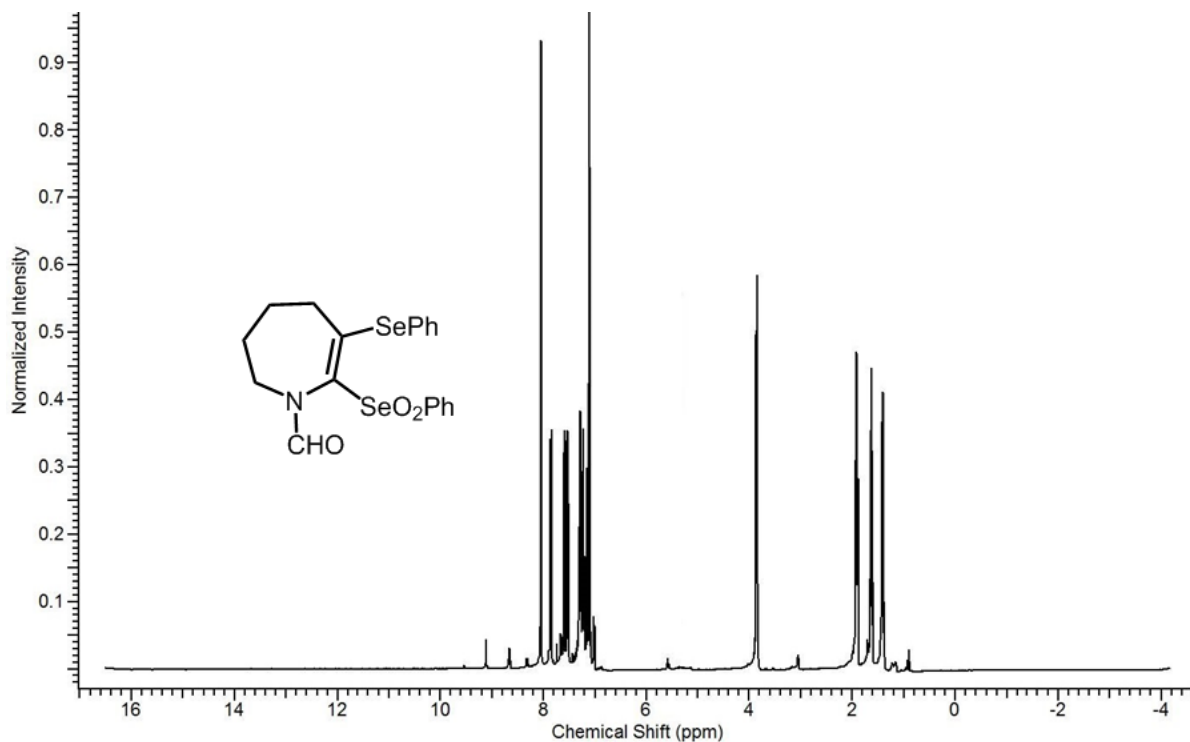

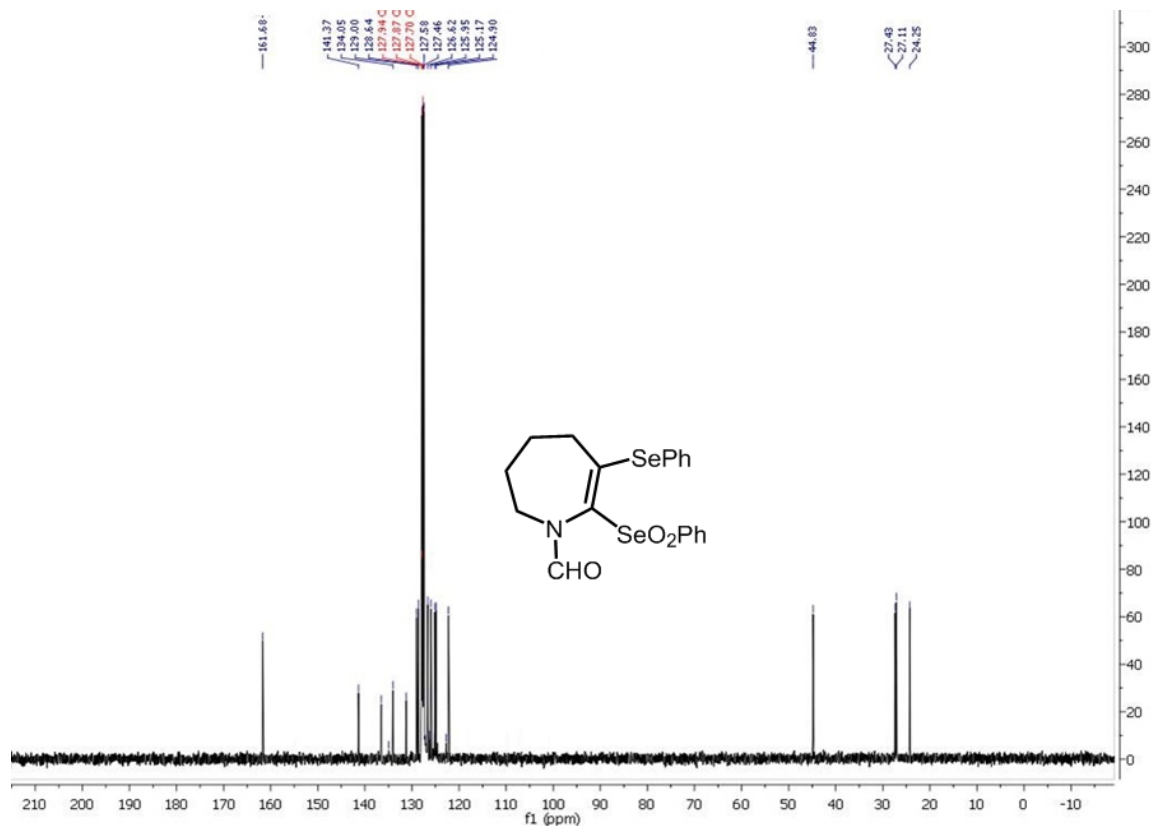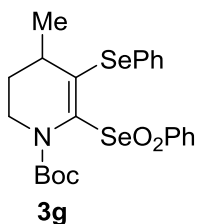

Prepared from **1a** (371 mg, 1 mmol) and PhSeSePh (628 mg, 2 equiv) using **General Procedure E**. Purification: Flash chromatography on silica (pretreated with 1% Et<sub>3</sub>N) eluting with hexane:EtOAc (95:5). Yield = 423 mg; 78%.  $\delta$  7.45 to 6.99 (10H), 3.91 to 3.55 (2H), 2.09 to 2.03 (1H), 1.68 to 1.50 (1H), 1.46 to 1.02 (11H), 0.86 to 0.60 (3H). <sup>13</sup>C NMR (101 MHz, C<sub>6</sub>D<sub>6</sub>, mixture of rotamers)  $\delta$  153.5, 141.4, 141.3, 139.5, 128.7, 127.1, 126.6, 125.6, 120.0, 79.5, 78.3, 42.8, 31.5, 28.8, 28.2, 27.9, 27.4, 21.6, 21.2. HRMS calc for C<sub>23</sub>H<sub>27</sub>NO<sub>4</sub>Se<sub>2</sub> 541.0271, found 541.0275.



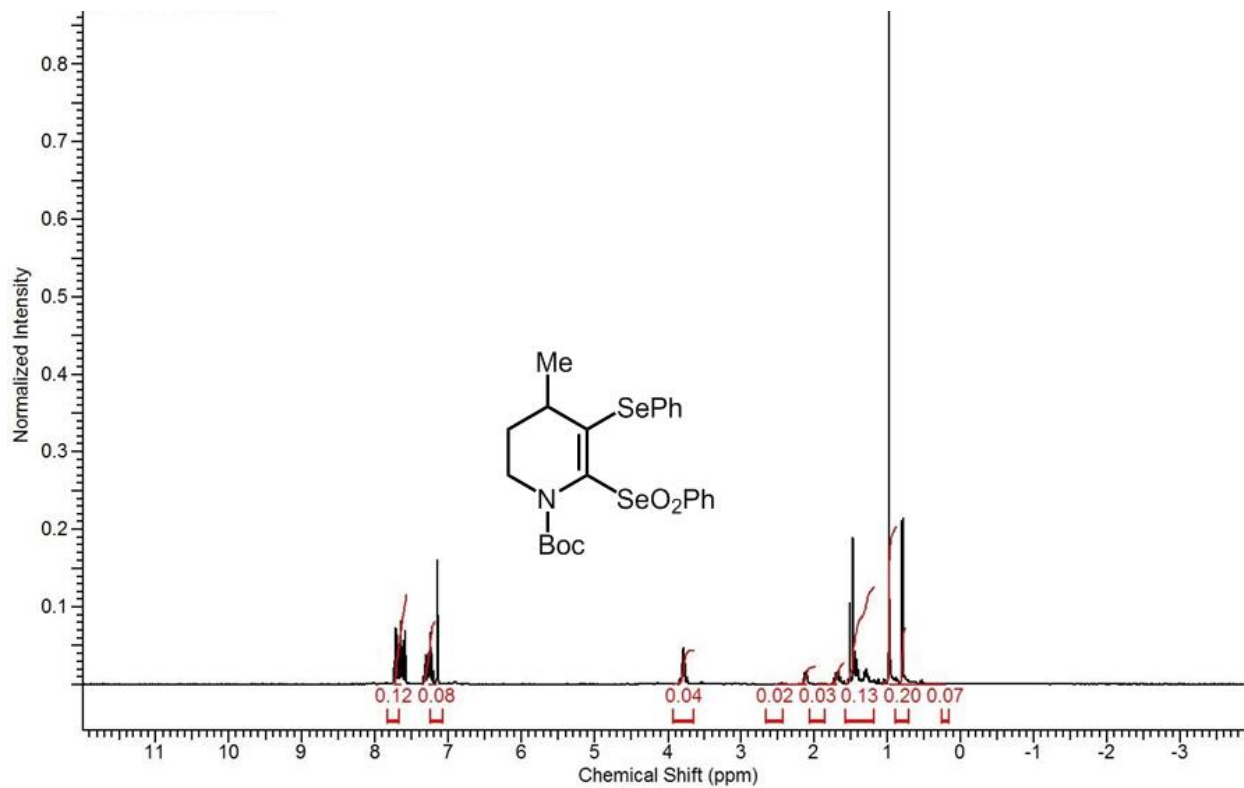

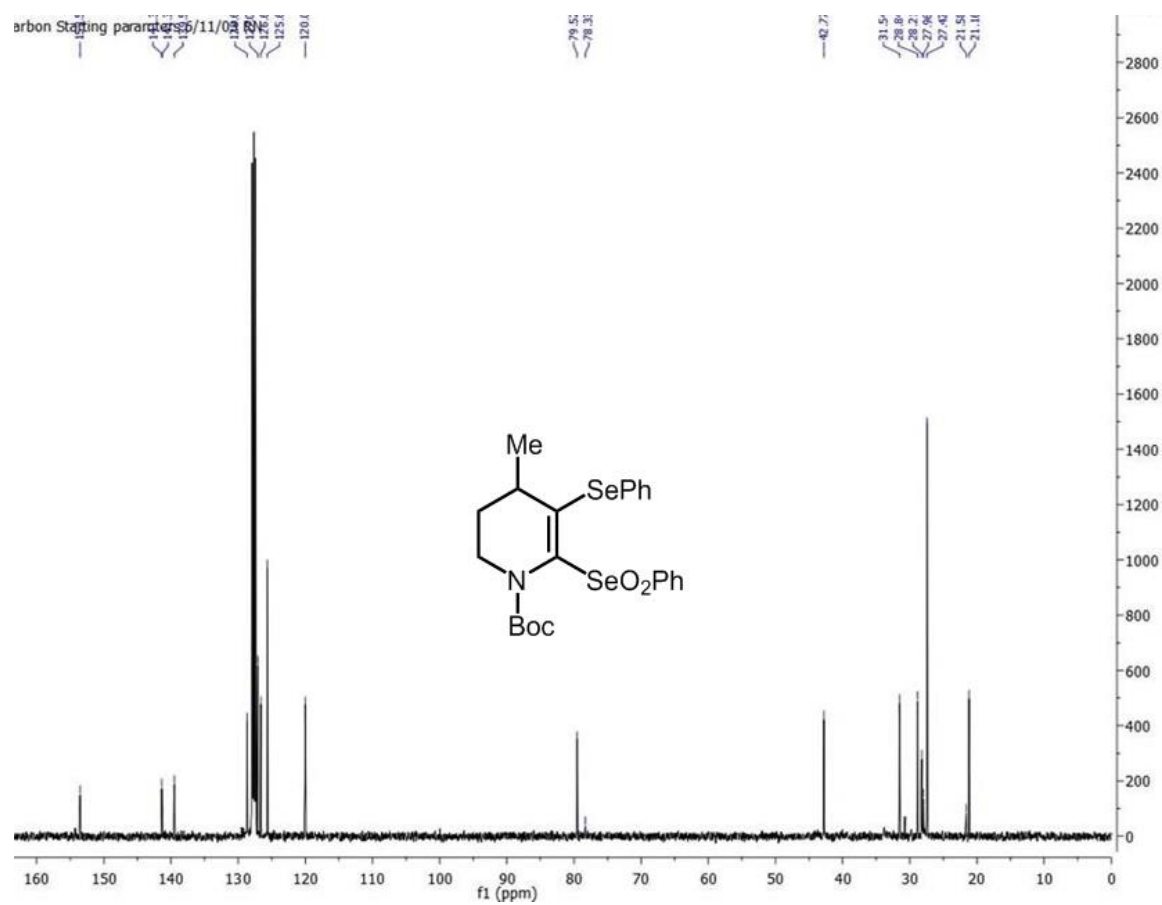

## 5. Cobalt-catalyzed reductive cross-coupling

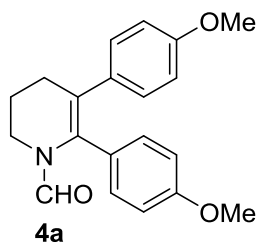

Prepared from **3e** (455 mg, 1 mmol) and *p*-bromoanisole (561 mg, 3 equiv), using General Procedure F. T = 23 °C for 8 h, then 40 °C for 16 h; Purification: Flash chromatography on silica (pretreated with 1% Et<sub>3</sub>N) eluting with hexane/EtOAc (80:20 to 50:50). Yield = 246 mg, 76%. <sup>1</sup>H NMR (400 MHz, CDCl<sub>3</sub>) δ 8.19 (1H, s), 7.52 (2H, d), 7.39 (2H, d), 6.99 (2H, d), 6.88 (2H, d), 3.90 to 3.85 (8H, m), 2.03 to 1.97 (2H, m), 1.76 to 1.70 (2H, m). <sup>13</sup>C NMR (101 MHz, CDCl<sub>3</sub>) δ 162.7, 159.8, 158.6, 142.5, 132.1, 130.6, 121.7, 115.9, 115.6, 114.0, 54.8, 54.8, 44.5, 28.6, 27.2, 24.2. HRMS calc for C<sub>19</sub>H<sub>19</sub>NO<sub>2</sub> 323.1521, found 323.1524.

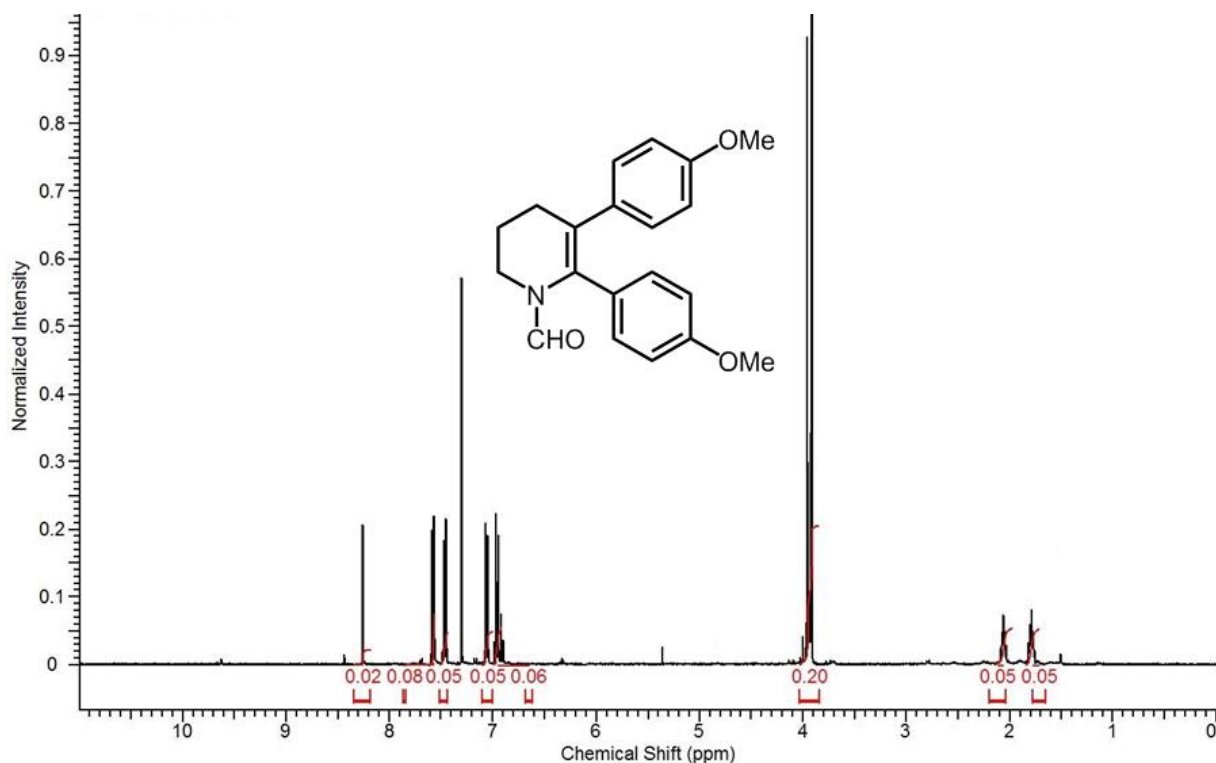

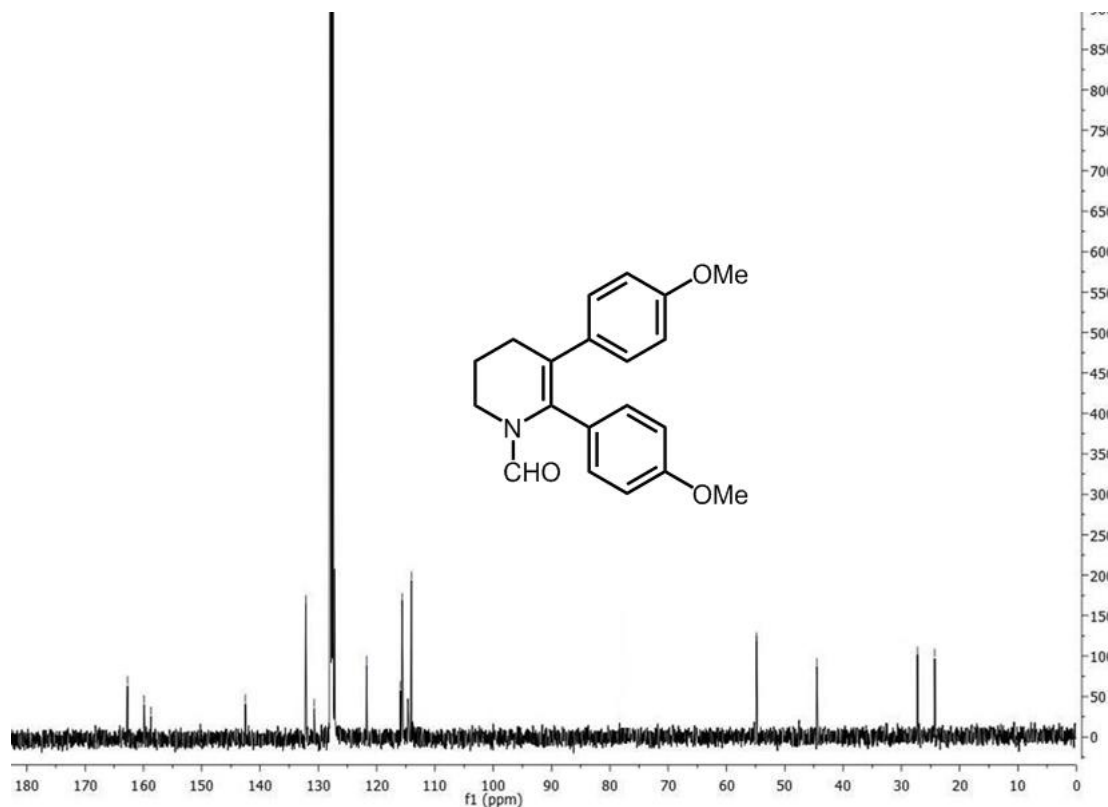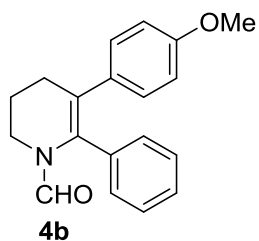

Prepared from **3e** (455 mg, 1 mmol), phenyl bromide (189 mg, 1.2 equiv) and *p*-bromoanisole (374 mg, 2 equiv), using General Procedure F. T = 23 °C for 8 h, then 40 °C for 16 h; Purification: Flash chromatography on silica (pretreated with 1% Et<sub>3</sub>N) eluting with hexane/EtOAc (80:20 to 50:50). Yield = 208 mg, 71%. <sup>1</sup>H NMR (400 MHz, CDCl<sub>3</sub>) δ 9.80 (1H, s), 7.7 (2H, d), 7.45 (2H, m), 7.28 to 7.25 (3H, m), 6.92 (2H, d), 3.80 (3H, s), 3.69 to 3.66 (2H, dd), 2.15 to 2.10 (2H, m), 1.76 to 1.70 (2H, m). <sup>13</sup>C NMR (101 MHz, CDCl<sub>3</sub>) δ 162.5, 159.9, 132.5, 131.9, 129.3, 128.5, 125.1, 121.7, 114.4, 109.5, 55.6, 41.2, 23.8, 21.1. HRMS calc for C<sub>19</sub>H<sub>19</sub>NO<sub>2</sub> 293.1416, found 293.1420.

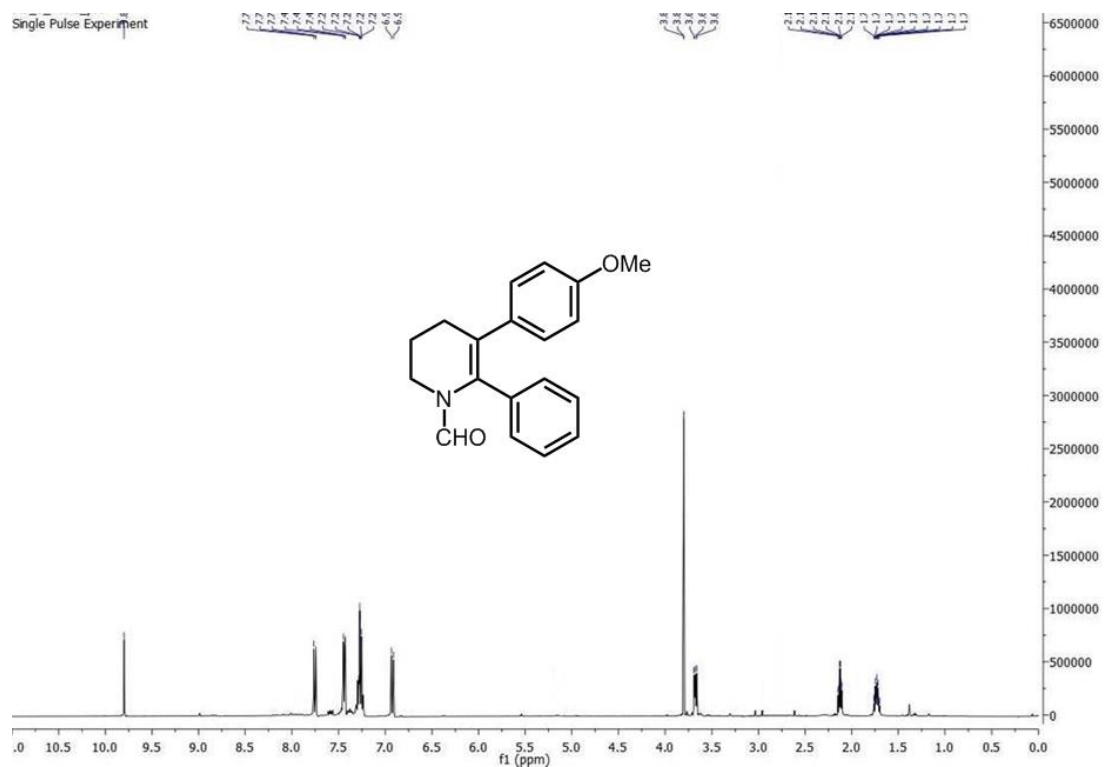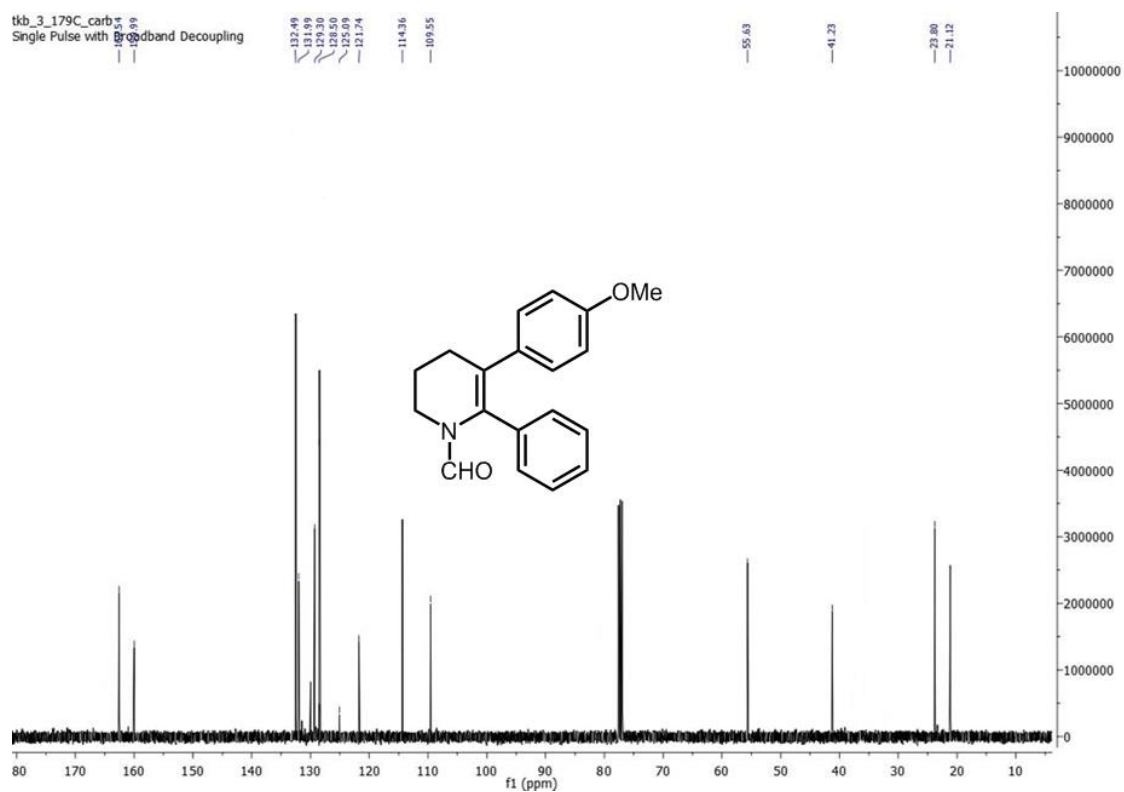

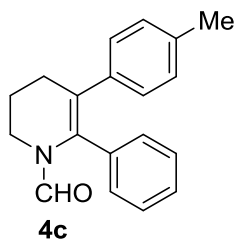

Prepared from **3e** (455 mg, 1 mmol), phenyl bromide (189 mg, 1.2 equiv) and *p*-bromotoluene (340 mg, 2 equiv), using General Procedure F. T = 23 °C for 8 h, then 40 °C for 16 h; Purification: Flash chromatography on silica (pretreated with 1% Et<sub>3</sub>N) eluting with hexane/EtOAc (90:10). Yield = 172 mg, 62%. <sup>1</sup>H NMR (400 MHz, CDCl<sub>3</sub>) δ 9.94 (1H, s), 7.77 to 7.25 (9H, m), 3.76 to 3.73 (2H, dd), 2.42 (3H, s), 2.21 to 2.17 (2H, m), 1.83 to 1.79 (2H, m). <sup>13</sup>C NMR (101 MHz, CHLOROFORM-*D*) δ 160.1, 145.6, 134.3, 132.2, 132.0, 131.5, 129.8, 129.3, 128.5, 121.9, 109.5, 41.3, 23.9, 21.9, 21.2. HRMS calc for C<sub>19</sub>H<sub>19</sub>NO 277.1467, found 277.1465.

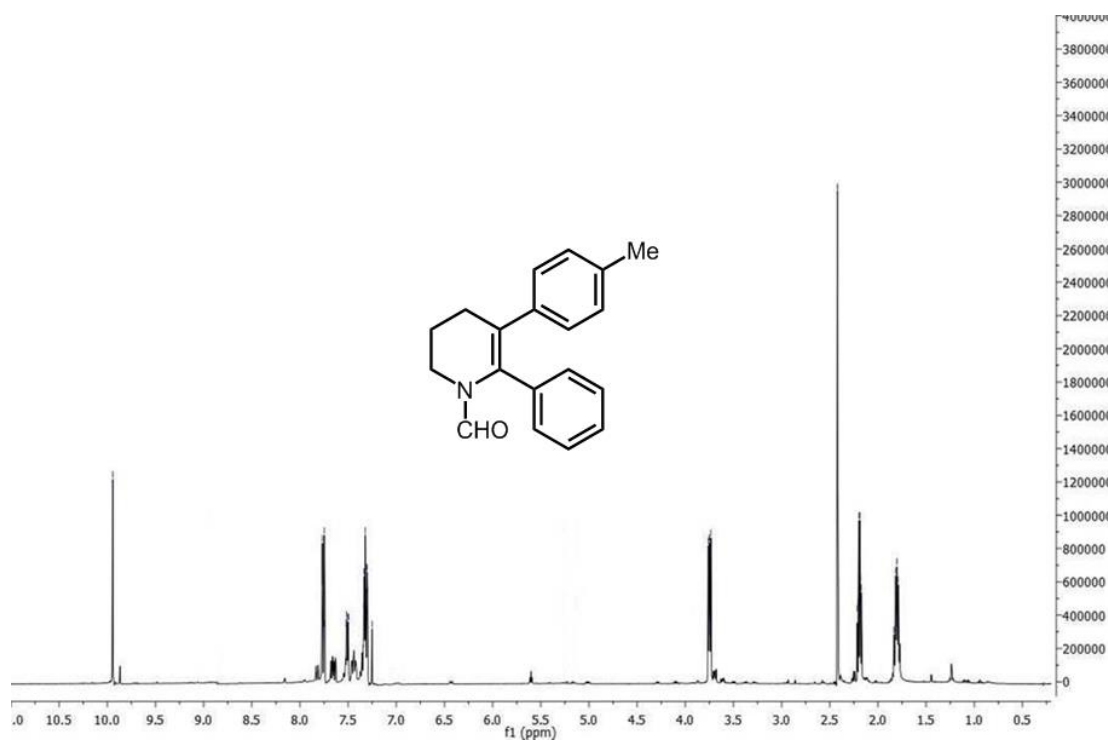

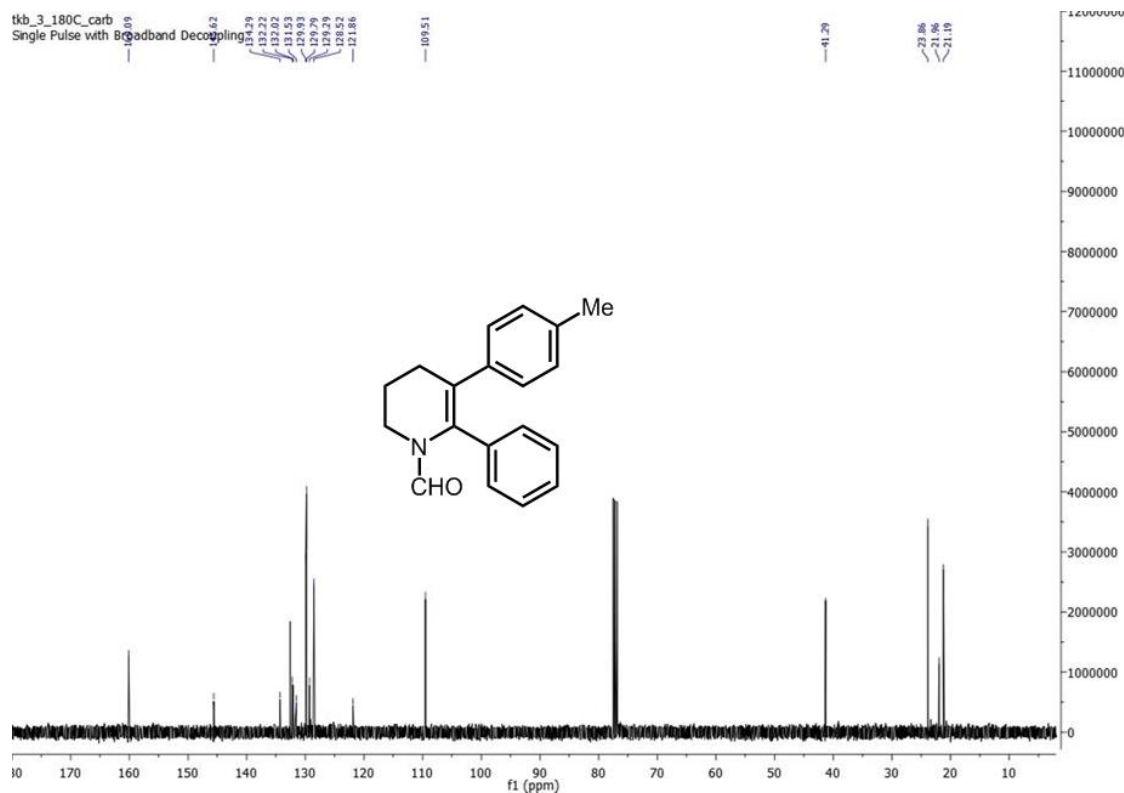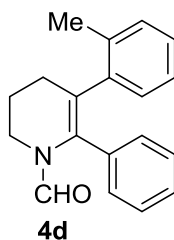

Prepared from **3e** (455 mg, 1 mmol), phenyl bromide (189 mg, 1.2 equiv) and *o*-bromotoluene (340 mg, 2 equiv), using General Procedure F. T = 23 °C for 8 h, then 40 °C for 16 h; Purification: Flash chromatography on silica (pretreated with 1% Et<sub>3</sub>N) eluting with hexane/EtOAc (90:10). Yield = 100 mg, 36%. <sup>1</sup>H NMR (400 MHz, CHLOROFORM-*D*) δ 10.26 (1H, s), 7.79 to 7.24 (9H, m), 3.77 to 3.74 (2H, dd), 2.66 (3H, s), 2.22 to 2.17 (2H, m), 1.83 to 1.77 (2H, m). <sup>13</sup>C NMR (101 MHz, CHLOROFORM-*D*) δ 160.1, 140.7, 134.2, 133.7, 132.6, 132.1, 131.8, 129.3, 128.5, 126.4, 121.9, 109.5, 41.3, 23.8, 21.2, 19.6. HRMS calc for C<sub>19</sub>H<sub>19</sub>NO 277.1467, found 277.1465.

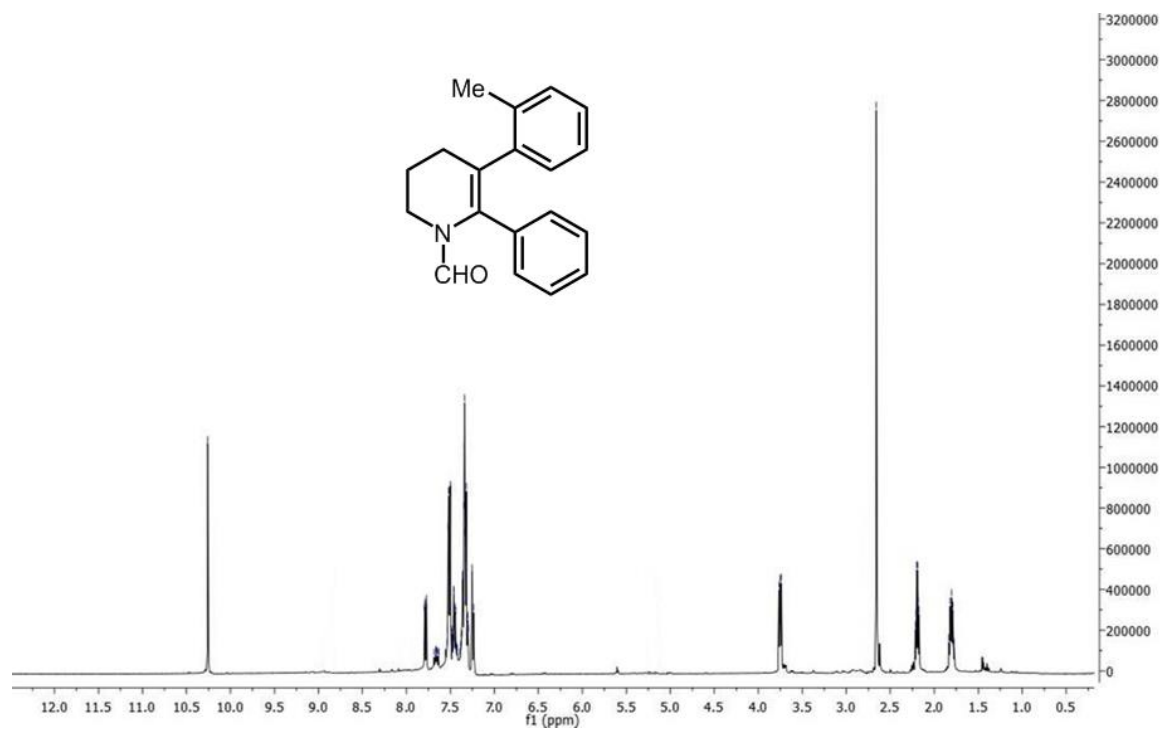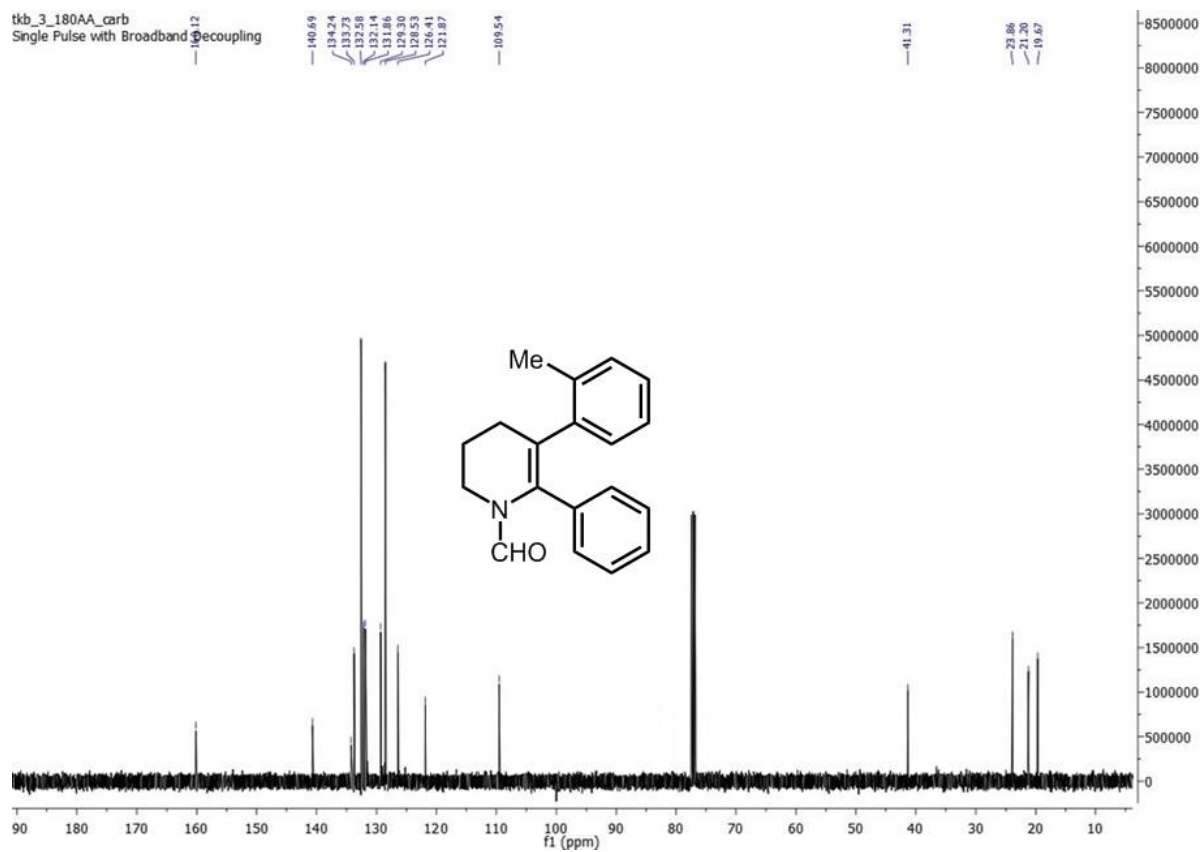



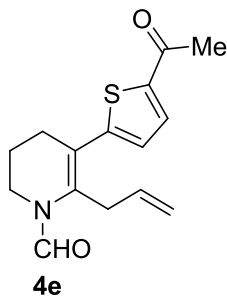

Prepared from **3e** (455 mg, 1 mmol), allyl bromide (180 mg, 1.5 mmol, 1.5 equiv) and 2-acetyl-5-bromothiophene (406 mg, 2 mmol, 2 equiv) using General Procedure F. T = 23 °C for 8 h, then 40 °C for 16 h. Purification: Flash chromatography on silica (pretreated with 1% Et<sub>3</sub>N) eluting with hexane/EtOAc (50:50). Yield = 223 mg, 81%. <sup>1</sup>H NMR (400 MHz, CDCl<sub>3</sub>) δ 8.49 (1H, s), 7.63 to 7.62 (1H, d), 7.09 to 7.08 (1H, d), 6.10 to 6.02 (1H, m), 5.40 to 5.37 (1H, dd), 5.20 to 5.17 (1H, dd), 3.99 to 3.77 (4H, m), 2.58 (3H, s), 2.42 to 2.28 (2H, m), 1.94 to 1.85 (2H, m). <sup>13</sup>C NMR (101 MHz, CDCl<sub>3</sub>) δ 190.4, 161.0, 146.8, 143.8, 134.1, 132.6, 126.7, 119.1, 116.2, 39.4, 33.0, 26.6, 23.4, 22.0. HRMS calc for C<sub>15</sub>H<sub>17</sub>NO<sub>2</sub>S 275.0980, found 275.0983.

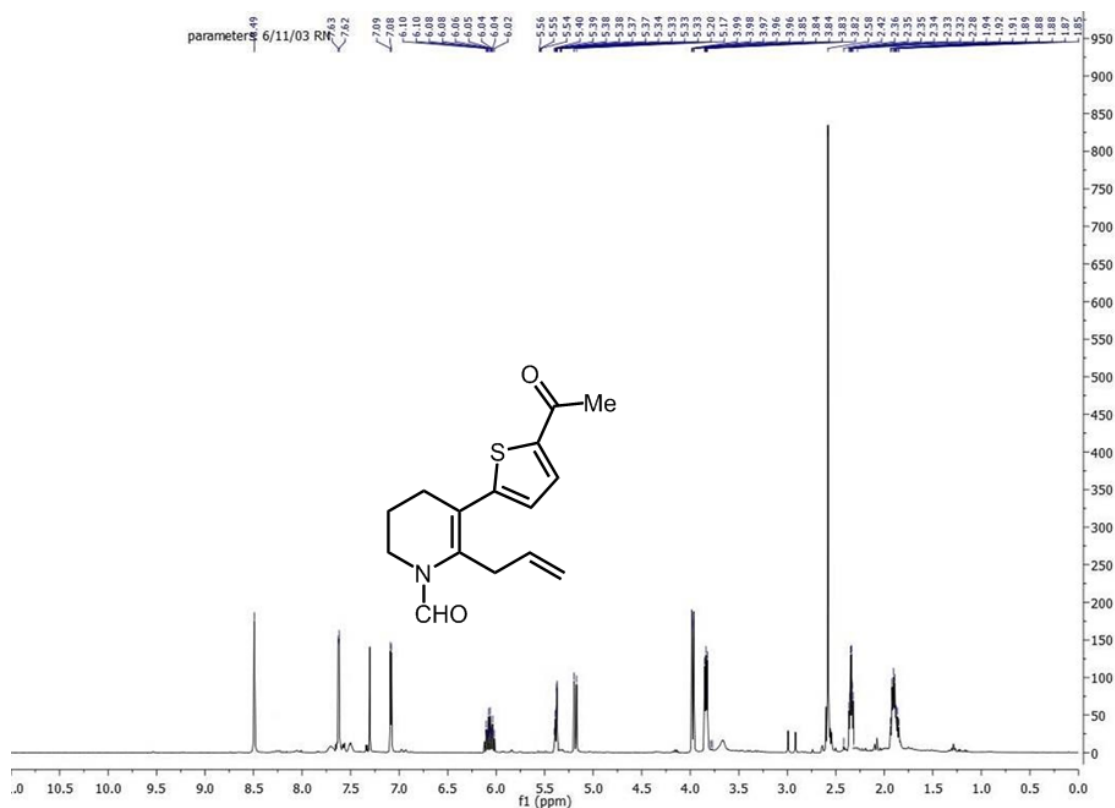

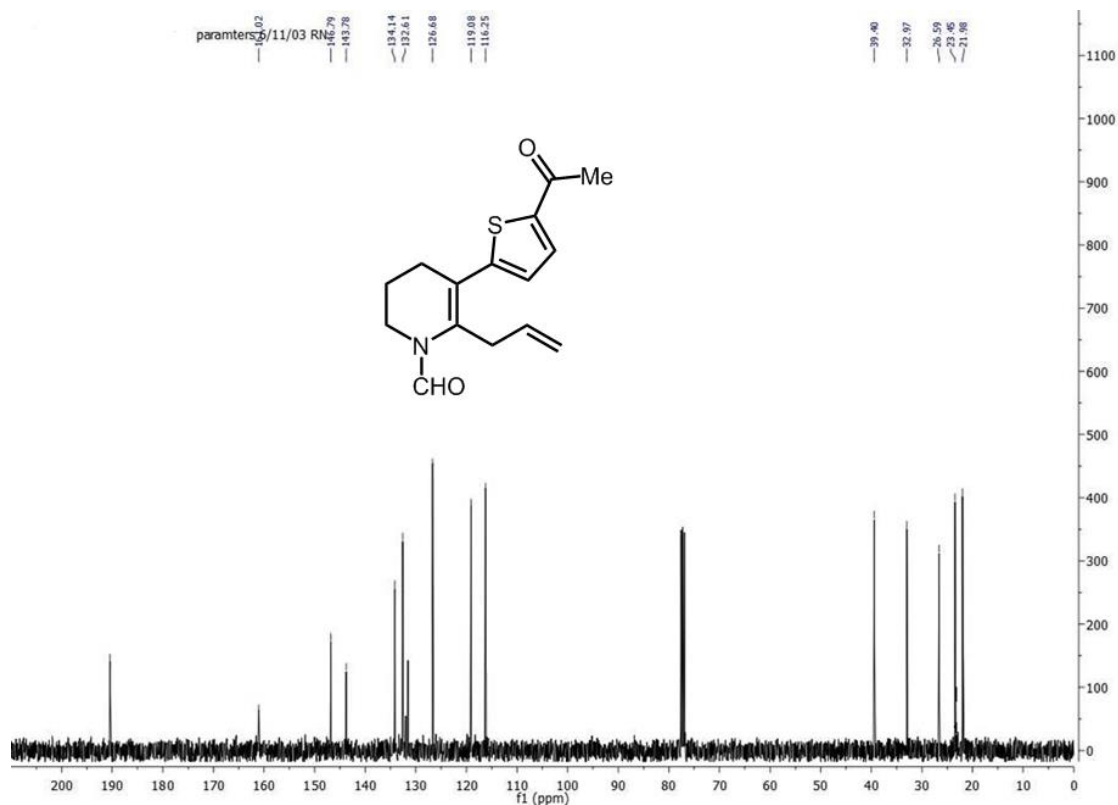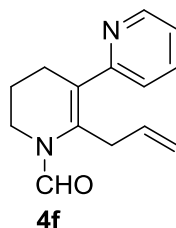

Prepared from **3e** (455 mg, 1 mmol), allyl bromide (180 mg, 1.5 mmol, 1.5 equiv) and 2-bromopyridine (314 mg, 2 mmol, 2 equiv) using General Procedure F. T = 23 °C for 8 h then 40 °C for 16 h. Purification: Flash chromatography on silica (pretreated with 1% Et<sub>3</sub>N) eluting with hexane/EtOAc (20:80 to 0:100). Yield = 96 mg, 42%.  $^1\text{H}$  NMR (400 MHz, CDCl<sub>3</sub>)  $\delta$  8.87 (1H), 8.38 to 8.36 (1H), 7.60 to 7.48 (2H), 7.30 to 7.26 (1H), 6.05 to 5.96 (1H), 5.32 to 5.28 (1H), 5.14 to 5.11 (1H), 3.93 to 3.73 (4H), 2.22 to 2.17 (2H), 1.86 to 1.77 (2H).  $^{13}\text{C}$  NMR (101 MHz, CDCl<sub>3</sub>)  $\delta$  162.5, 149.9, 141.8, 138.9, 134.1, 128.4, 125.0, 122.7, 119.1, 109.5, 41.2, 36.5, 23.7, 21.1. HRMS calc for C<sub>14</sub>H<sub>16</sub>N<sub>2</sub>O 228.1263, found 228.1265.

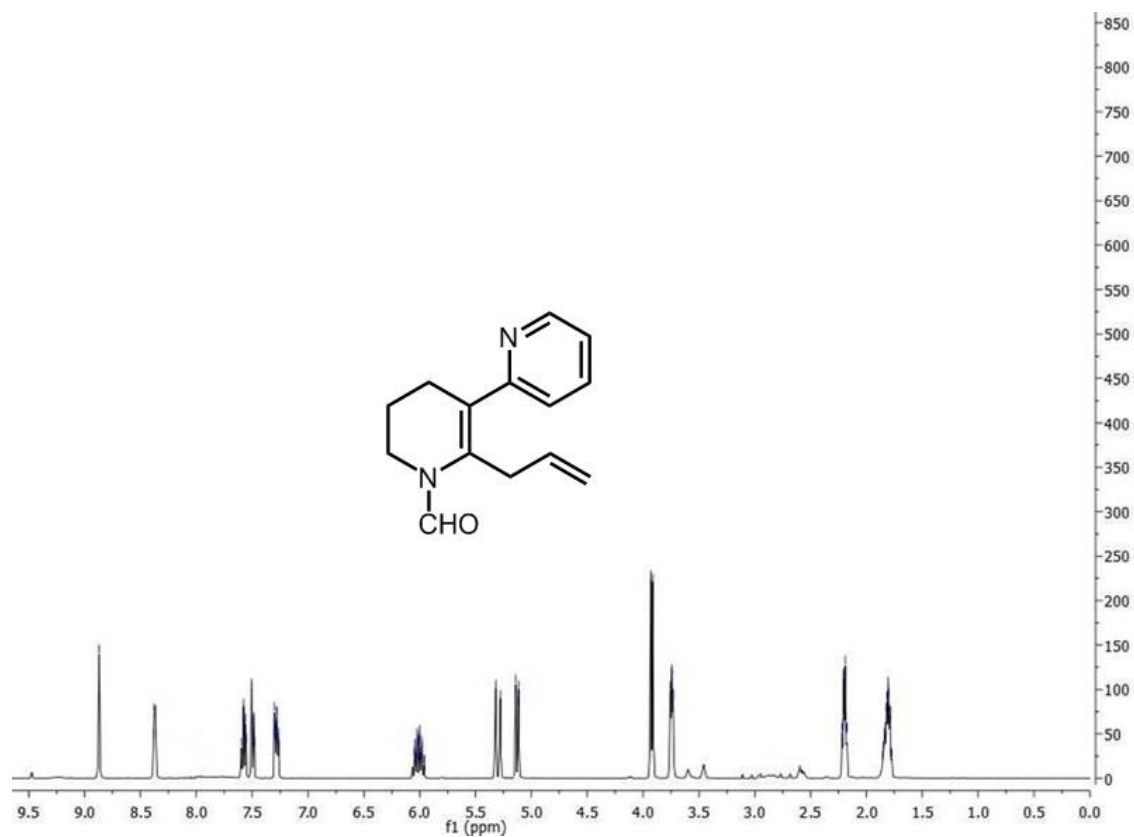

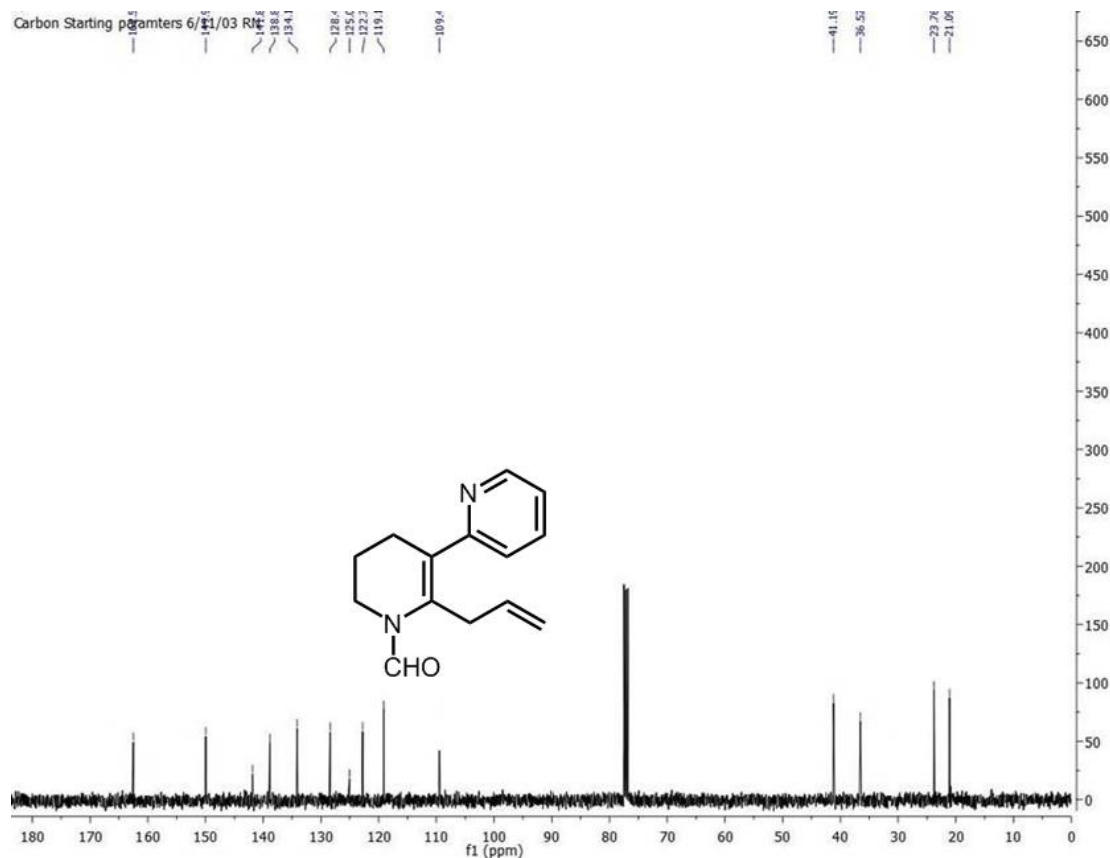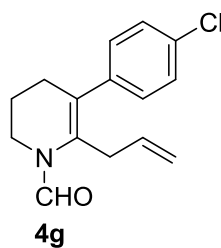

Prepared from **3e** (455 mg, 1 mmol), allyl bromide (180 mg, 1.5 mmol, 1.5 equiv) and *p*-chlorobromobenzene (380 mg, 2 mmol, 2 equiv) using General Procedure F. T = 23 °C for 8 h, then 40 °C for 16 h. Purification: Flash chromatography on silica (pretreated with 1% Et<sub>3</sub>N) eluting with hexane/EtOAc (80:20 to 60:40). Yield = 173 mg, 66%. <sup>1</sup>H NMR (400 MHz, CDCl<sub>3</sub>) δ 8.92 (1H, s), 7.91 (2H, d), 7.82 (2H, d), 6.11 to 6.00 (1H, m), 5.36 (1H, d), 5.32 (1H, d), 3.96 (2H, d), 3.80 to 3.78 (2H, dd), 2.26 to 2.22 (2H, m), 1.88 to 1.82 (2H, m). <sup>13</sup>C NMR (101 MHz, CDCl<sub>3</sub>) δ 162.8, 138.4, 134.2, 132.7, 132.4, 125.1, 119.1, 109.5, 104.3, 41.2, 32.9, 23.8, 21.1. **HRMS-EI<sup>+</sup>** (*m/z*): calc for C<sub>16</sub>H<sub>16</sub>ClNO [M<sup>+</sup>] 261.0920, found 261.0924.

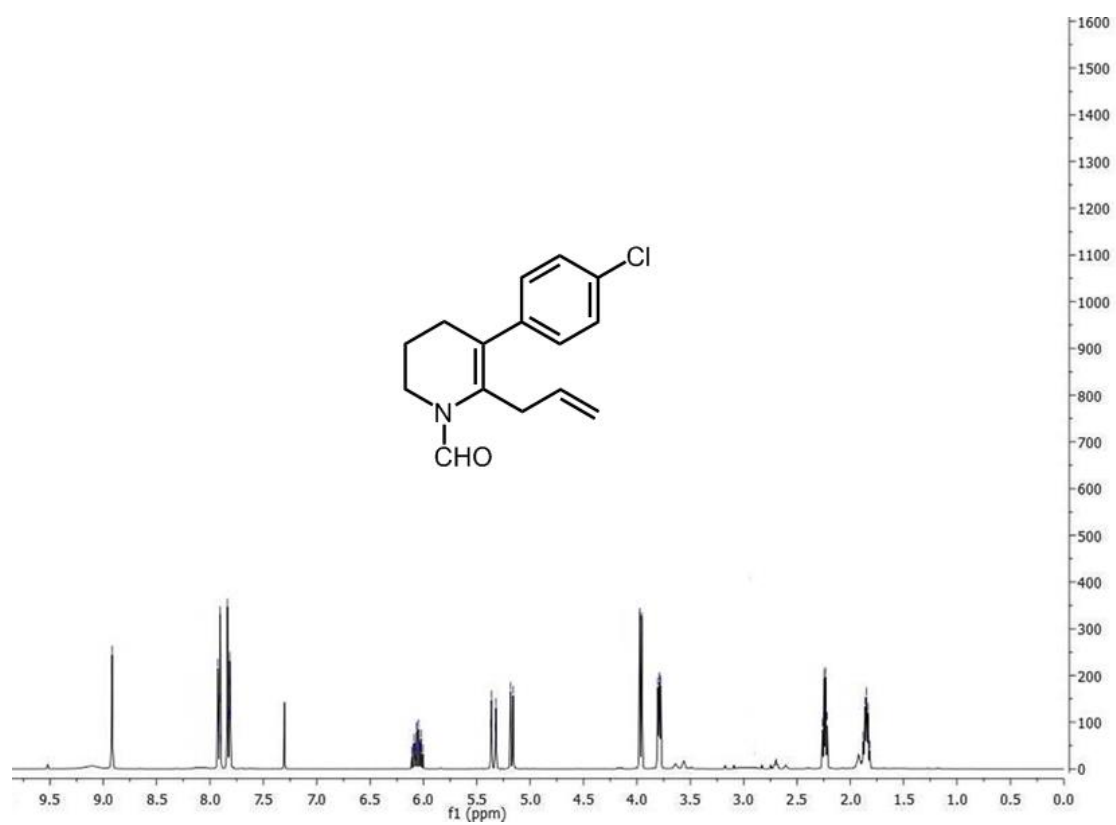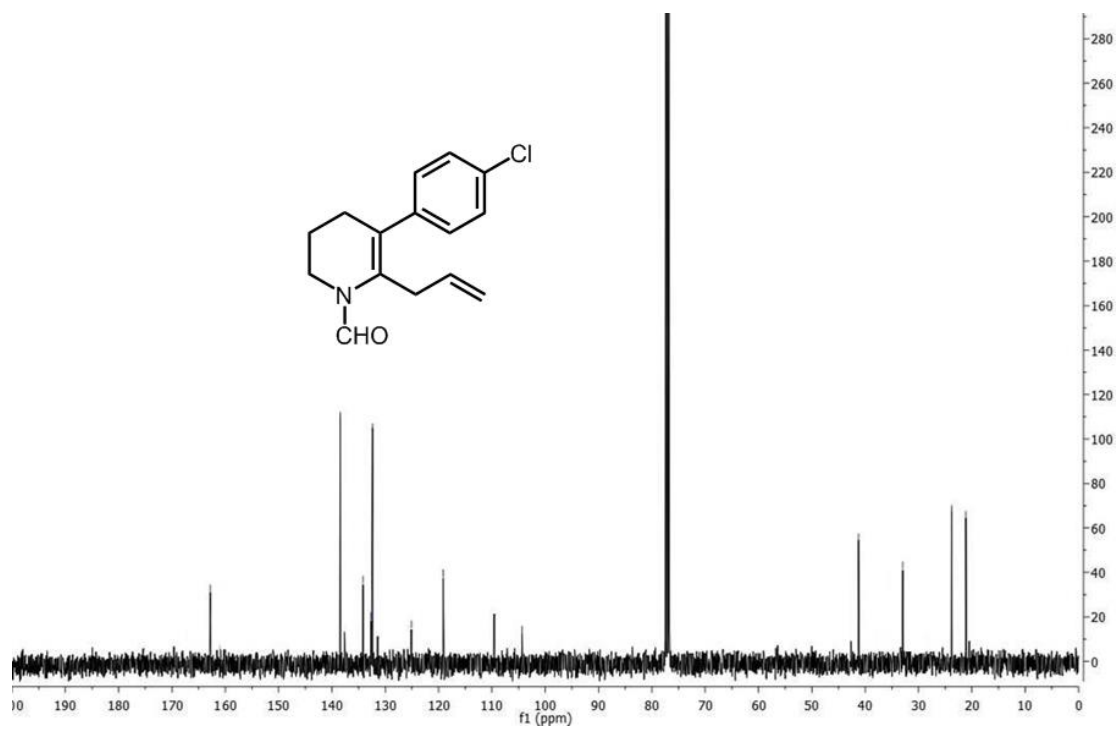

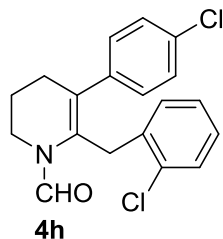

Prepared from **3e** (455 mg, 1 mmol), 2-chlorobenzyl bromide (245 mg, 1.2 mmol, 1.2 equiv) and *p*-chlorobromobenzene (380 mg, 2 mmol, 2 equiv) using General Procedure F. T = 23 °C for 8 h, then 40 °C for 16 h. Purification: Flash chromatography on silica (pretreated with 1% Et<sub>3</sub>N) eluting with hexane/EtOAc (80:20). Yield = 217.5 mg, 63%. <sup>1</sup>H NMR (400 MHz, CDCl<sub>3</sub>) δ 8.91 (1H, s), 8.13 to 8.10 (2H, d), 7.87 to 7.85 (1H, d), 7.72 to 7.69 (2H, d), 7.50 to 7.33 (2H, t), 7.01 to 6.97 (1H, t), 4.61 (2H, s), 3.79 to 3.76 (2H, dd), 2.25 to 2.21 (2H, m), 1.90 to 1.81 (2H, m). <sup>13</sup>C NMR (101 MHz, CDCl<sub>3</sub>) δ 162.6, 140.1, 132.6, 130.5, 130.1, 130.0, 128.9, 125.0, 109.5, 100.0, 41.2, 38.8, 23.8, 21.1. **HRMS-EI<sup>+</sup>** (*m/z*): calc for C<sub>19</sub>H<sub>17</sub>Cl<sub>2</sub>NO [M<sup>+</sup>] 345.0687, found 345.0690.

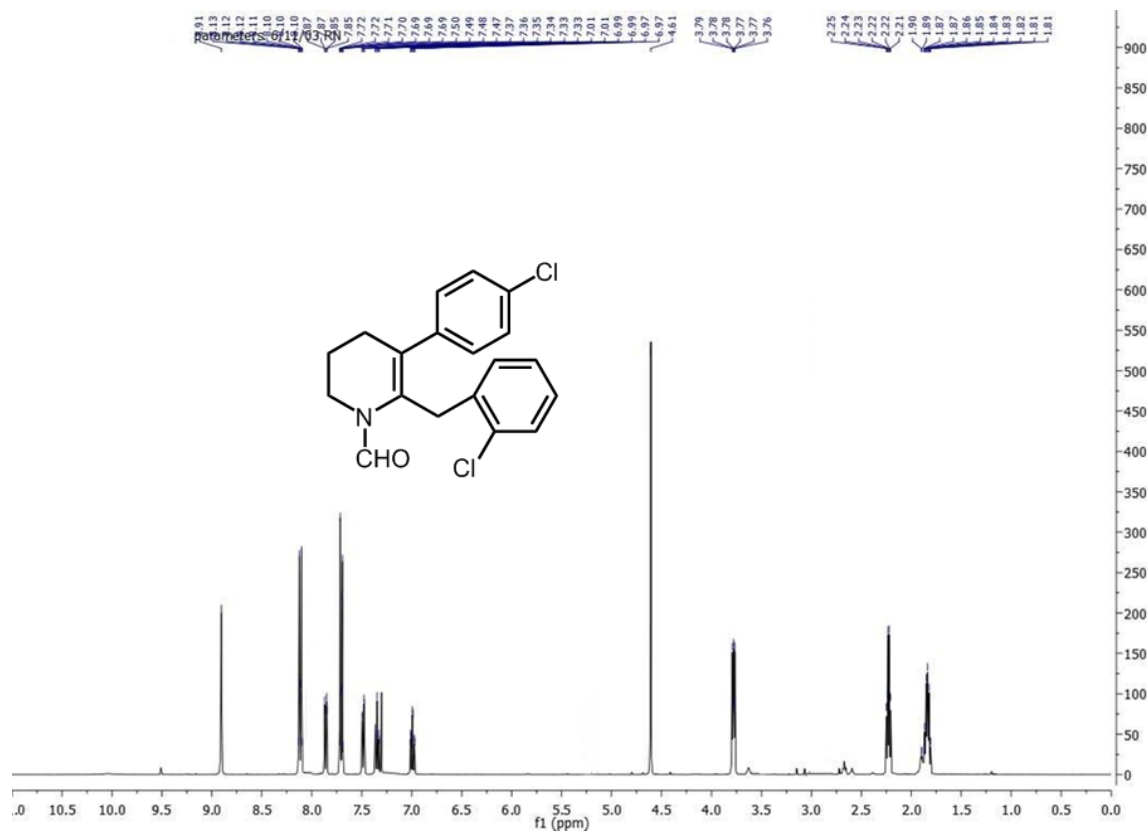

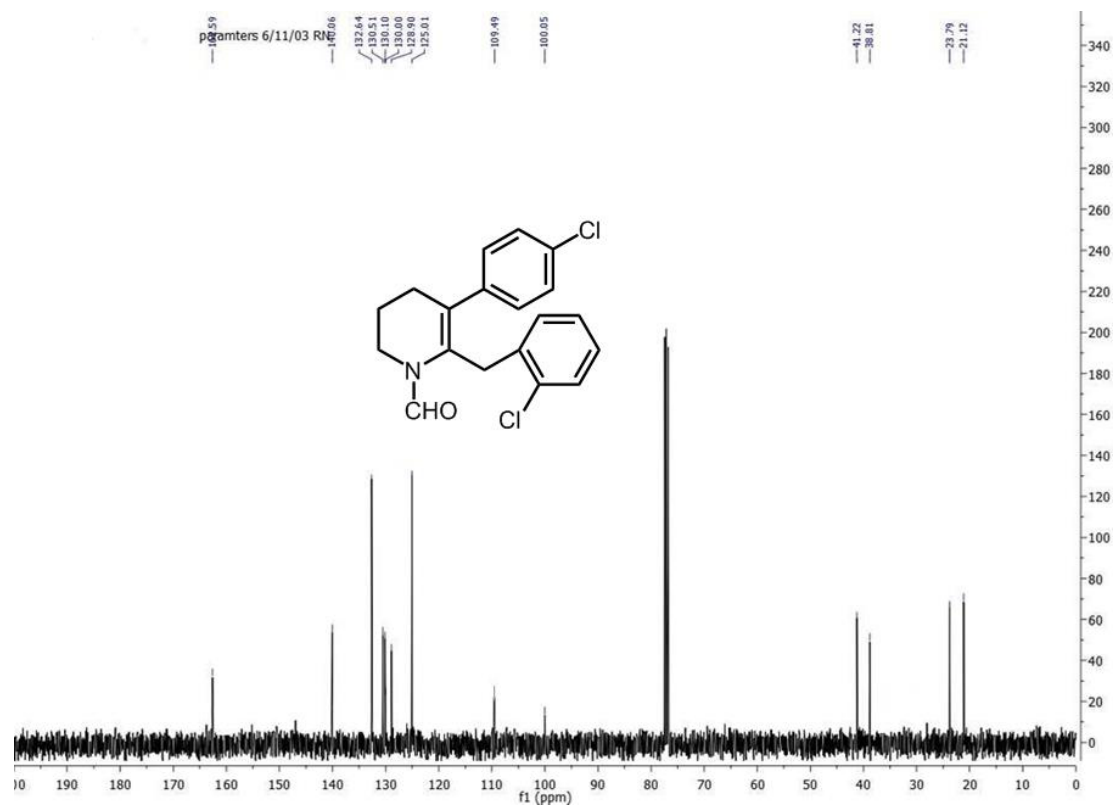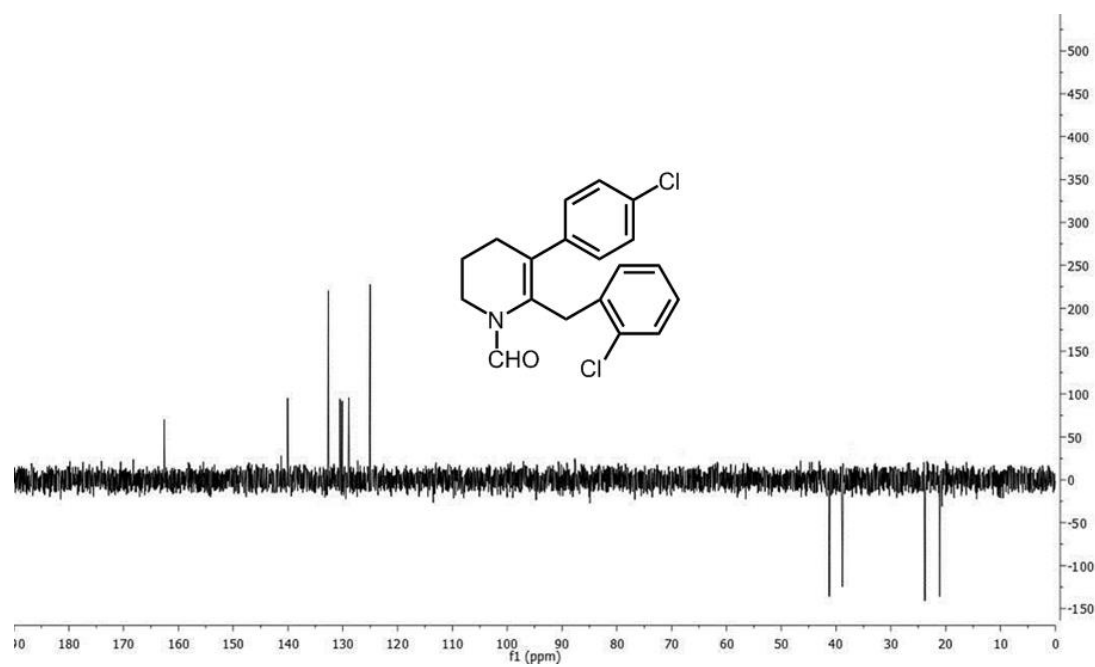

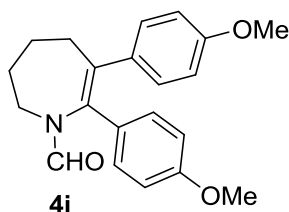

Prepared from **3f** (469 mg, 1 mmol) and *p*-bromoanisole (561 mg, 3 equiv), using General Procedure F. T = 23 °C for 8 h, then 40 °C for 16 h. Purification: Flash chromatography on silica (pretreated with 1% Et<sub>3</sub>N) eluting with hexane/EtOAc (50:50 to 20:80). Yield = 273 mg, 81%. Data as reported by us.<sup>3</sup>

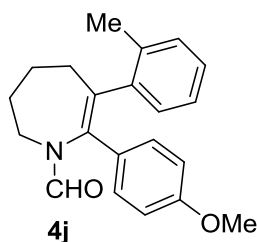

Prepared from **3f** (469 mg, 1 mmol), *p*-bromoanisole (225 mg, 1.2 equiv), and 2-bromotoluene (340 mg, 2 equiv), using General Procedure F. T = 23 °C for 8 h, then 40 °C for 16 h. Purification: Flash chromatography on silica (pretreated with 1% Et<sub>3</sub>N) eluting with hexane/EtOAc (80:20 to 50:50). Yield = 145 mg, 45%. Data as reported by us.<sup>3</sup>

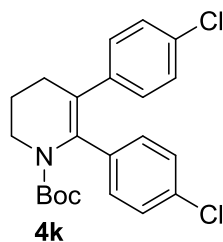

Prepared from **3d** (527 mg, 1 mmol) and *p*-chlorobromobenzene (570 mg, 3 mmol, 3 equiv) using General Procedure F. T = 23 °C for 8 h, then 40 °C for 16 h. Purification: Flash chromatography on silica (pretreated with 1% Et<sub>3</sub>N) eluting with PE/DCM (1:1). Yield = 234 mg; 58%. <sup>1</sup>H NMR (400 MHz, C<sub>6</sub>D<sub>6</sub>) δ 7.02 & 7.00 (2H), 6.94 & 6.92 (2H), 3.60 to 3.58 (2H), 1.78 to 1.73 (2H), 1.48 to 1.42 (2H), 1.07 (9H). <sup>13</sup>C NMR (101 MHz, C<sub>6</sub>D<sub>6</sub>) δ 153.4, 139.8, 139.4, 132.2, 128.8, 128.1, 114.7, 79.7, 44.1, 27.4, 23.4, 23.2. **HRMS-ESI<sup>+</sup>** (*m/z*): calc for C<sub>22</sub>H<sub>23</sub>Cl<sub>2</sub>NO<sub>2</sub> [M<sup>+</sup>] 403.1106, found 403.1110



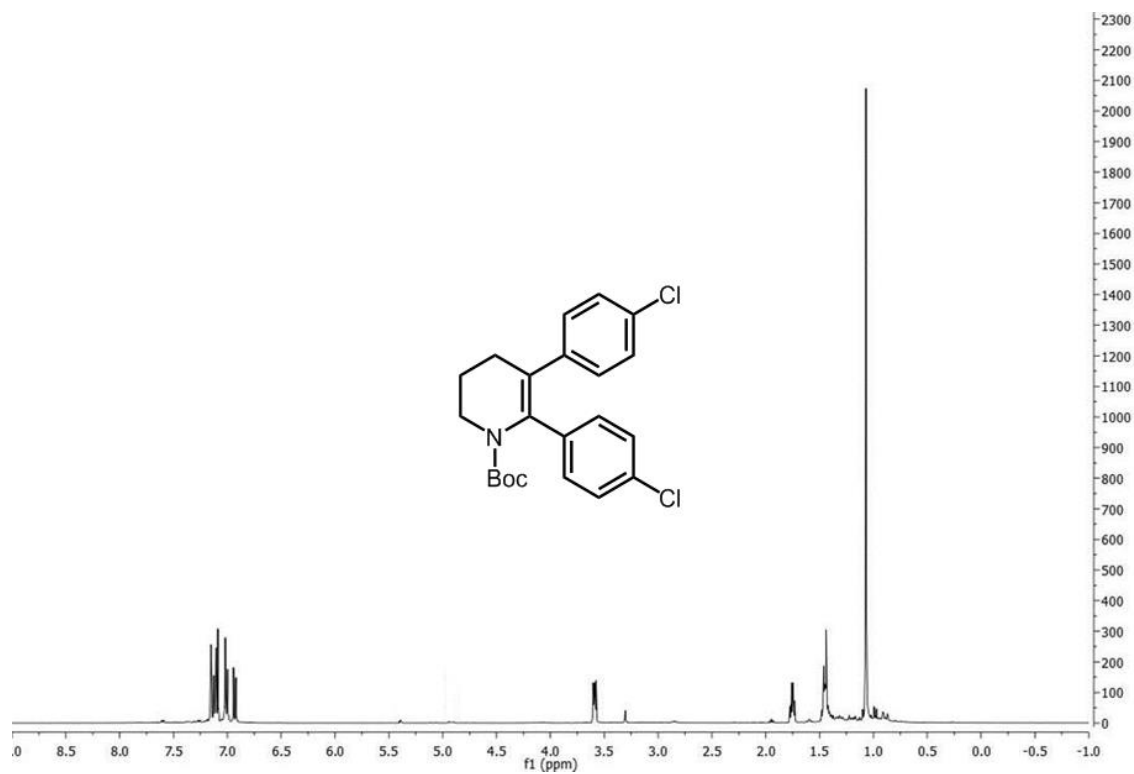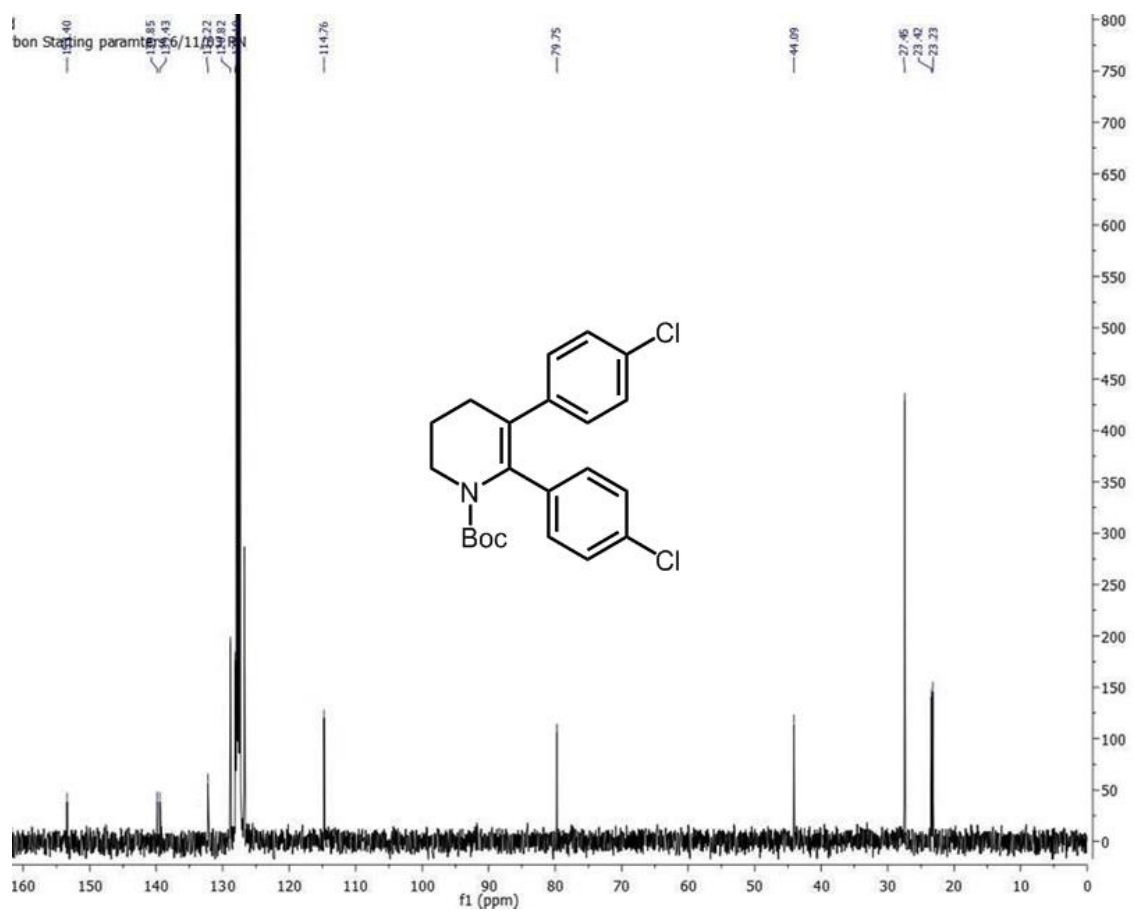

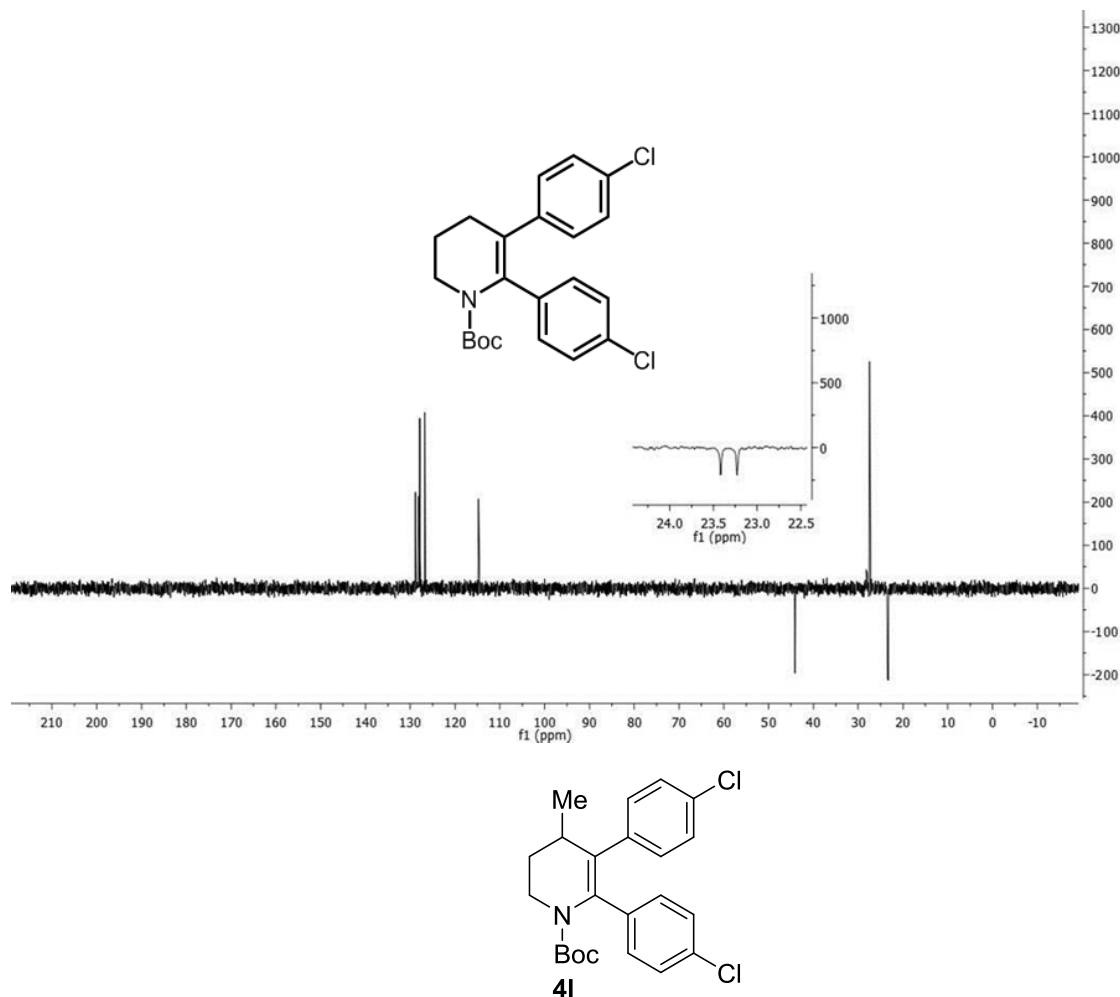

Prepared from **3g** (541 mg, 1 mmol) and *p*-chlorobromobenzene (570 mg, 3 mmol, 3 equiv) using General Procedure F. T = 23 °C for 8 h, then 40 °C for 16 h. Purification: Flash chromatography on silica (pretreated with 1%  $\text{Et}_3\text{N}$ ). PE/DCM (2:1). Yield = 259 mg; 62%.  $^1\text{H}$  NMR (400 MHz,  $\text{C}_6\text{D}_6$ , mixture of rotamers)  $\delta$  7.22 to 7.00 (2H, d), 6.95 to 6.90 (2H, d), 3.69 to 3.55 (2H, dd), 2.04 to 1.98 (1H, dd), 1.64 to 1.19 (11H, m), 0.87 to 0.65 (3H, d).  $^{13}\text{C}$  NMR (101 MHz,  $\text{C}_6\text{D}_6$ )  $\delta$  153.3, 139.7, 138.4, 132.3, 128.8, 127.8, 126.9, 120.5, 79.8, 42.7, 31.4, 28.8, 28.2, 27.4, 21.0. **HRMS- $\text{EI}^+$**  ( $m/z$ ): calc for  $\text{C}_{17}\text{H}_{22}\text{ClNO}_2$  [ $\text{M}^+$ ] 417.1262, found 417.1266.

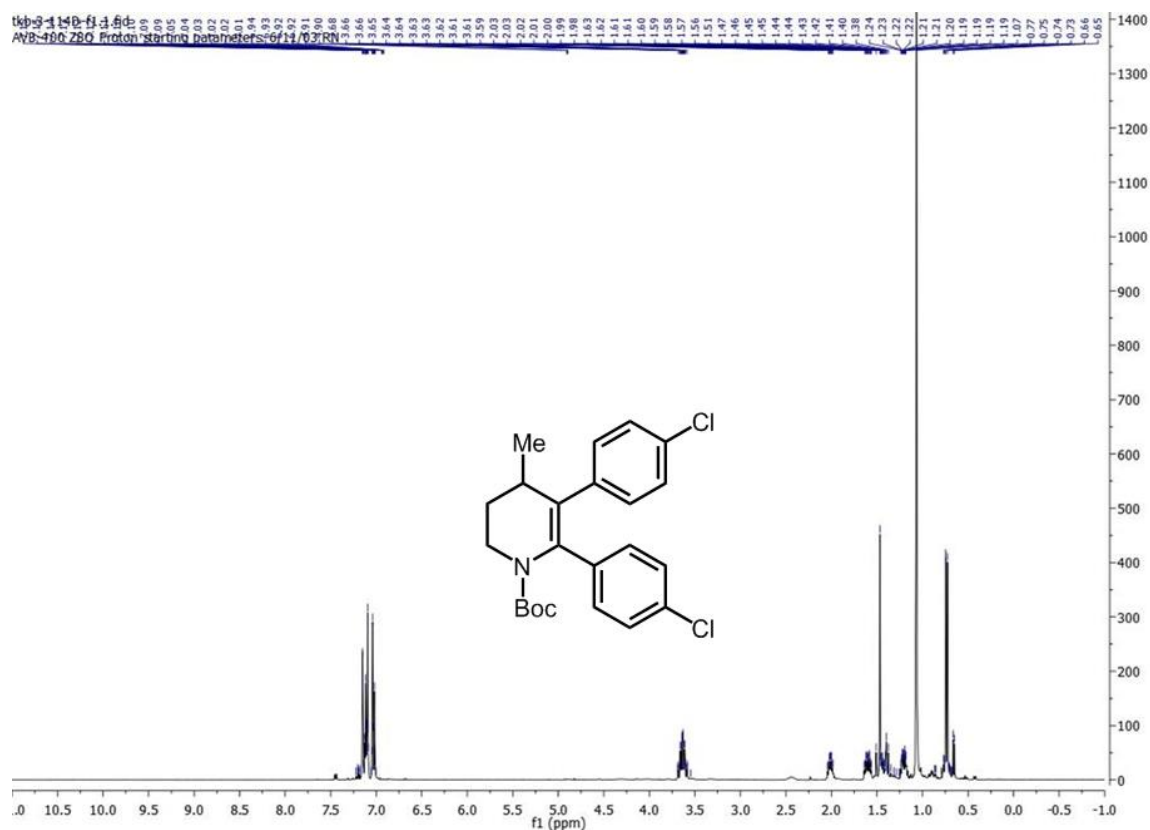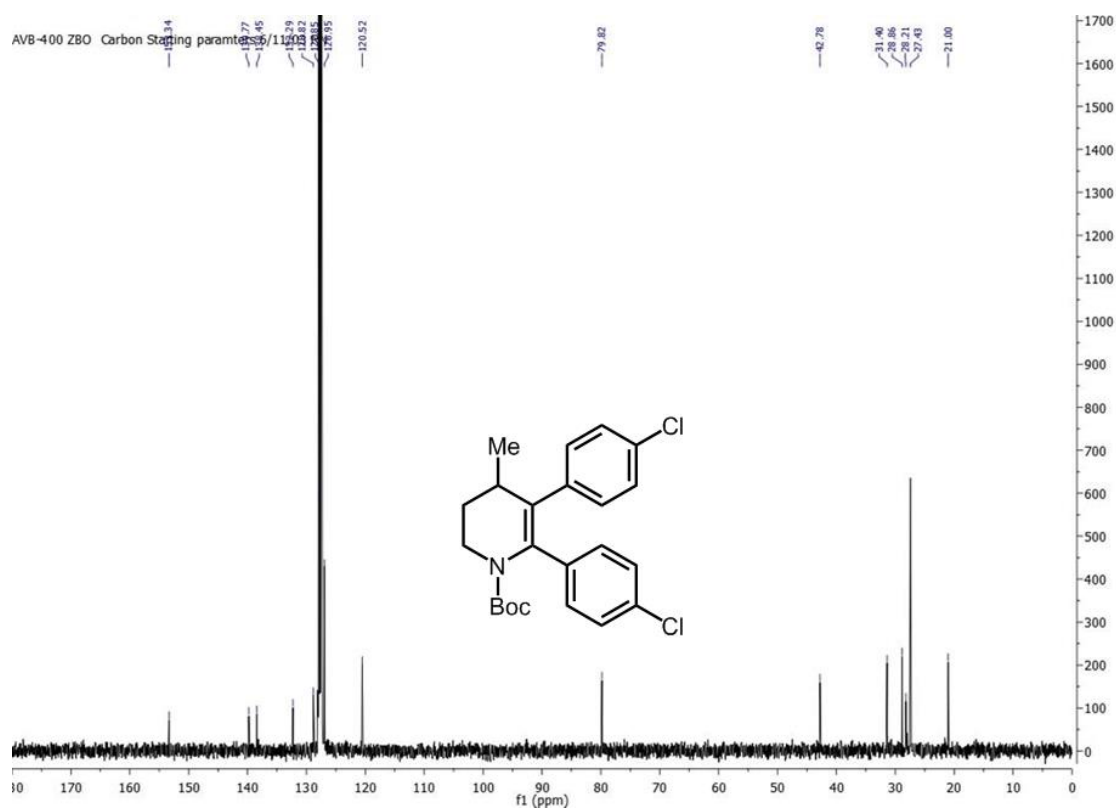

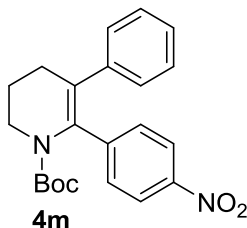

Prepared from **3d** (527 mg, 1 mmol) and *p*-nitrobromobenzene (241 mg, 1.2 mmol, 1.2 equiv) and phenyl bromide (312 mg, 2 equiv) using General Procedure F. T = 23 °C for 8 h, then 40 °C, for 16 h. Purification: Flash chromatography on silica (pretreated with 1% Et<sub>3</sub>N) eluting with PE/DCM (1:1). Yield = 183 mg; 48%. <sup>1</sup>H NMR (400 MHz, C<sub>6</sub>D<sub>6</sub>) δ 7.78 (2H, d), 7.32 to 7.11 (7H, m), 3.55 to 3.53 (2H, dd), 1.73 to 1.69 (2H, m), 1.46 to 1.39 (2H, m), 1.07 (9H, s). <sup>13</sup>C NMR (101 MHz, C<sub>6</sub>D<sub>6</sub>) δ 159.5, 149.5, 141.9, 139.6, 129.2, 129.1, 129.0, 128.9, 128.6, 128.6, 128.4, 128.3, 128.1, 127.8, 124.0, 116.8, 80.2, 43.9, 27.4, 23.4, 23.0. **HRMS-EI<sup>+</sup>** (*m/z*): calc for C<sub>22</sub>H<sub>24</sub>N<sub>2</sub>O<sub>4</sub> [M<sup>+</sup>] 380.1736, found 380.1739.

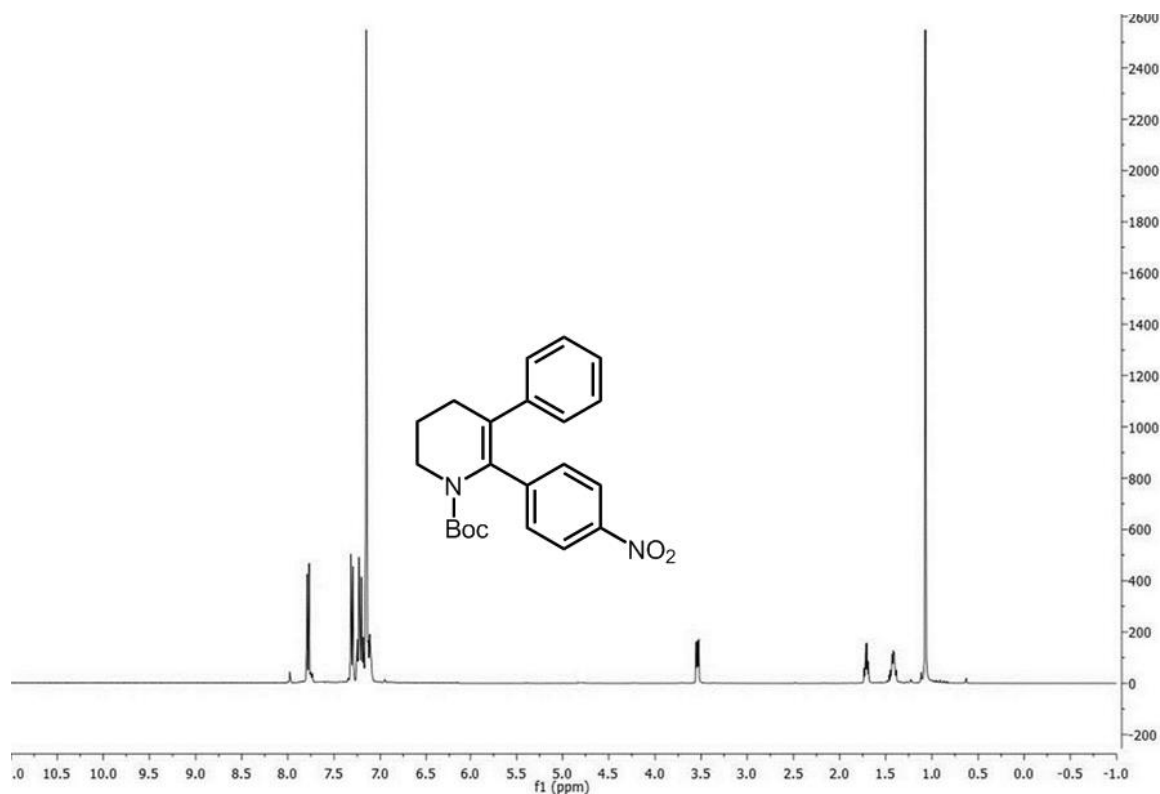

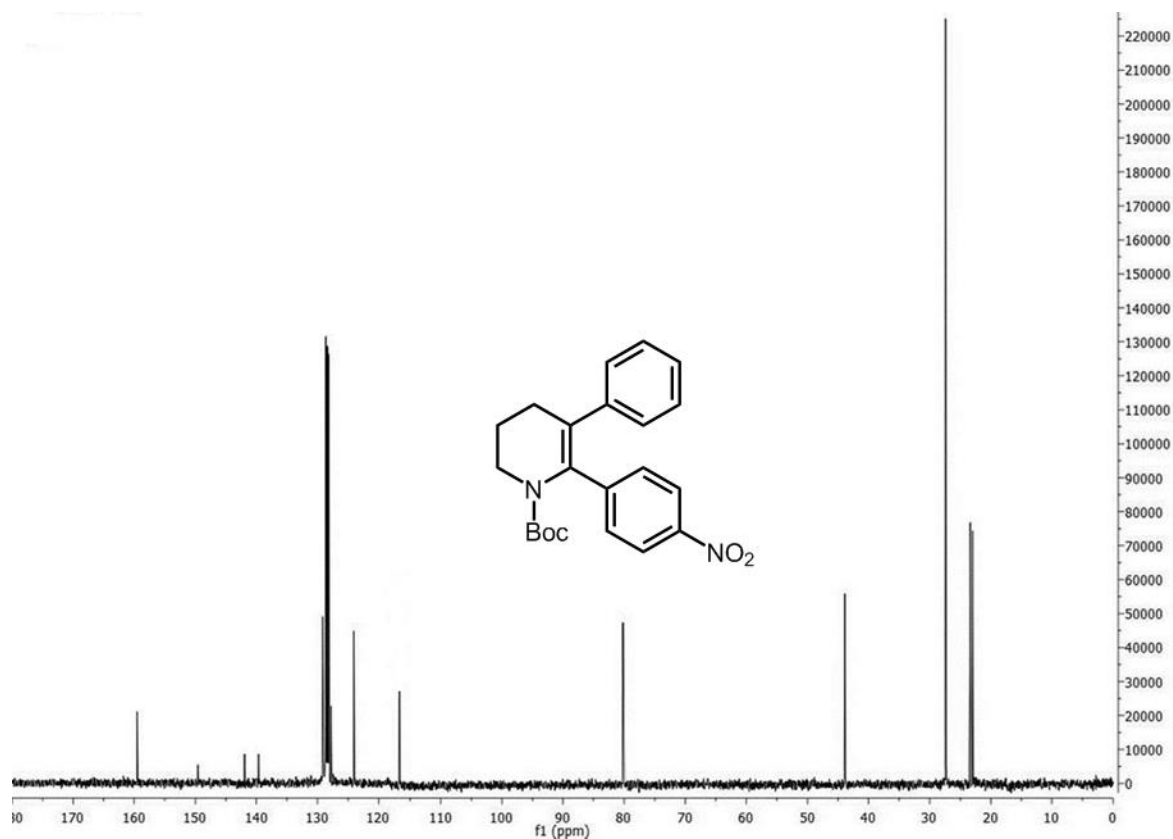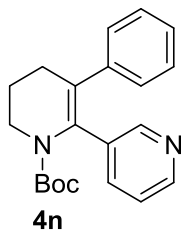

Prepared from **3d** (527 mg, 1 mmol) and *m*-bromopyridine (188 mg, 1.2 mmol, 1.2 equiv) and phenyl bromide (312 mg, 2 equiv) using General Procedure F. T = 23 °C for 8 h, then 40 °C, for 16 h. Purification: Flash chromatography on silica (pretreated with 1% Et<sub>3</sub>N) eluting with PE/DCM (1:3). Yield = 182 mg; 54%.  $^1\text{H}$  NMR (400 MHz, C<sub>6</sub>D<sub>6</sub>)  $\delta$  8.83 (1H, s), 8.48 (1H, d), 7.83 (1H, dd), 7.33 to 7.09 (5H, m), 6.66 (1H, dd), 3.56 to 3.53 (2H, dd), 1.70 to 1.66 (2H, m), 1.42 to 1.39 (2H, m), 1.06 (9H, s).  $^{13}\text{C}$  NMR (101 MHz, C<sub>6</sub>D<sub>6</sub>)  $\delta$  158.4, 151.6, 150.7, 139.4, 133.6, 131.7, 128.4, 128.3, 127.9, 127.9, 127.8, 127.7, 127.6, 127.4, 126.9, 123.2, 116.9, 80.3, 43.9, 27.4, 23.4, 23.1. **HRMS-ESI<sup>+</sup>** (*m/z*): calc for C<sub>21</sub>H<sub>24</sub>N<sub>2</sub>O<sub>2</sub> [*M*<sup>+</sup>] 336.1838, found 336.1841.

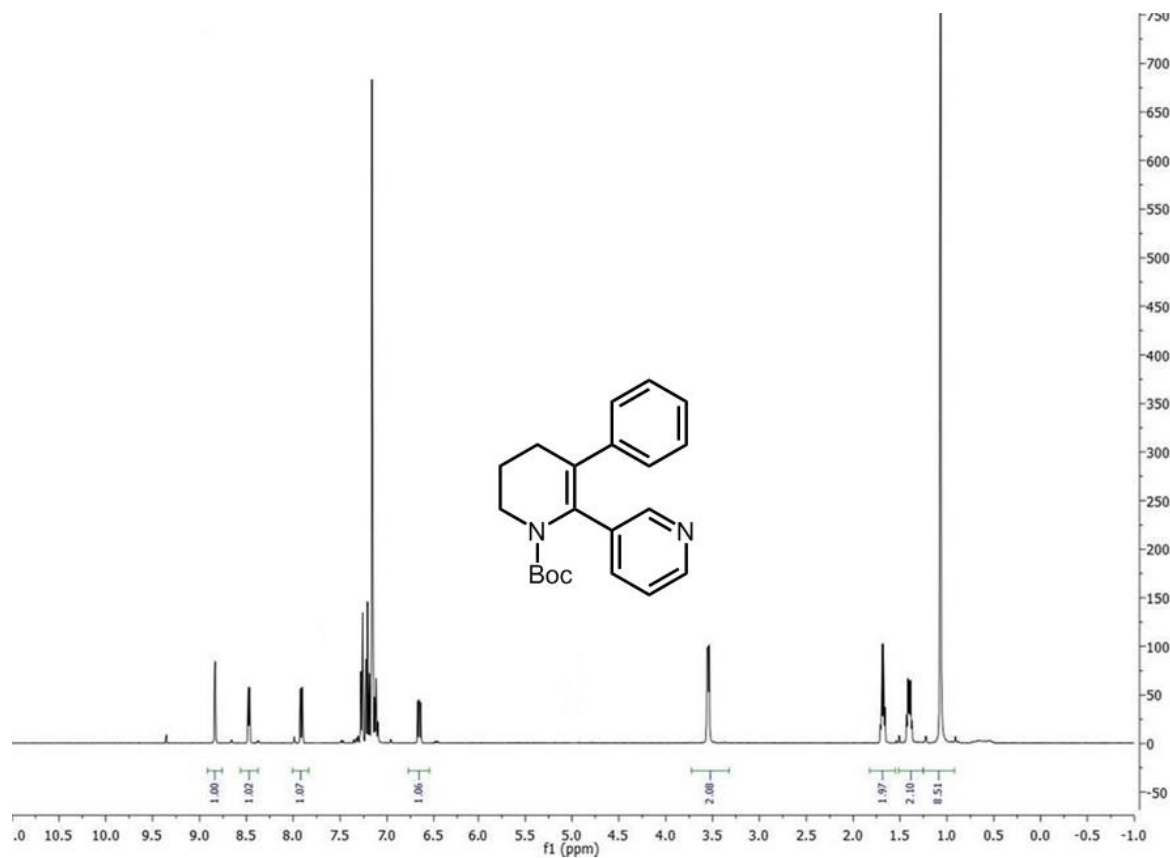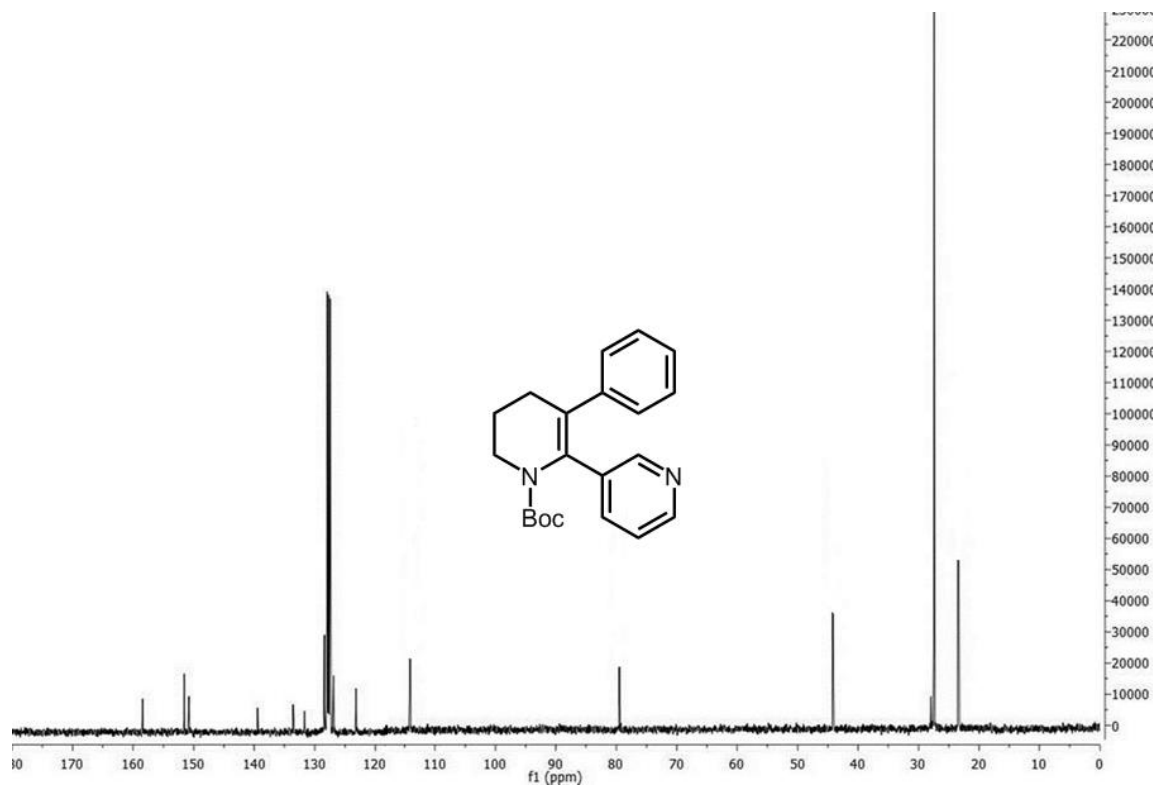

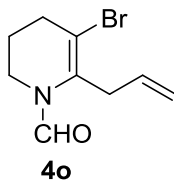

Prepared from **3b** (377 mg, 1 mmol) and allyl bromide (180 mg, 1.5 mmol, 1.5 equiv) using General Procedure F. T = 23 °C for 12 h. Purification: Flash chromatography on silica (pretreated with 1% Et<sub>3</sub>N) eluting with hexane/EtOAc (90:10). Yield = 140 mg, 61%. <sup>1</sup>H NMR (400 MHz, C<sub>6</sub>D<sub>6</sub>) δ 8.93 (1H, s), 5.60 to 5.50 (1H, m), 4.96 to 4.88 (2H, m), 3.43 to 3.32 (2H, dd), 2.65 to 2.61 (2H, d), 1.57 to 1.46 (2H, m), 1.09 to 1.03 (2H, m). <sup>13</sup>C NMR (101 MHz, C<sub>6</sub>D<sub>6</sub>) δ 159.9, 134.6, 122.4, 117.2, 116.5, 41.3, 38.0, 28.4, 22.1. **HRMS-ESI<sup>+</sup>** (*m/z*): calc'd for C<sub>9</sub>H<sub>12</sub>BrNO 229.0102, found 229.0105.

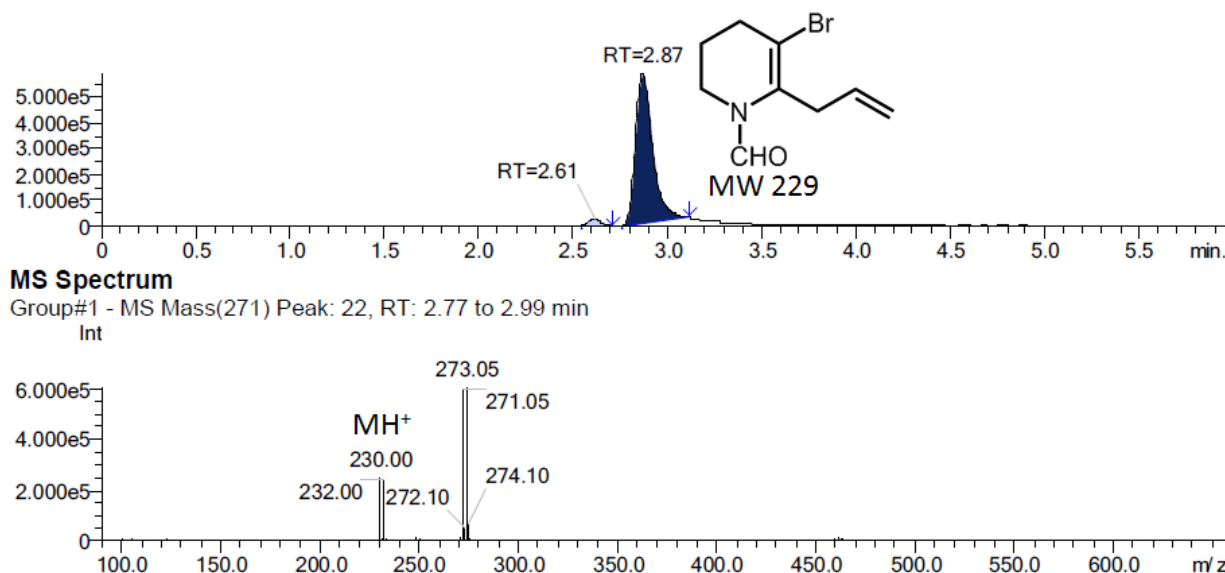

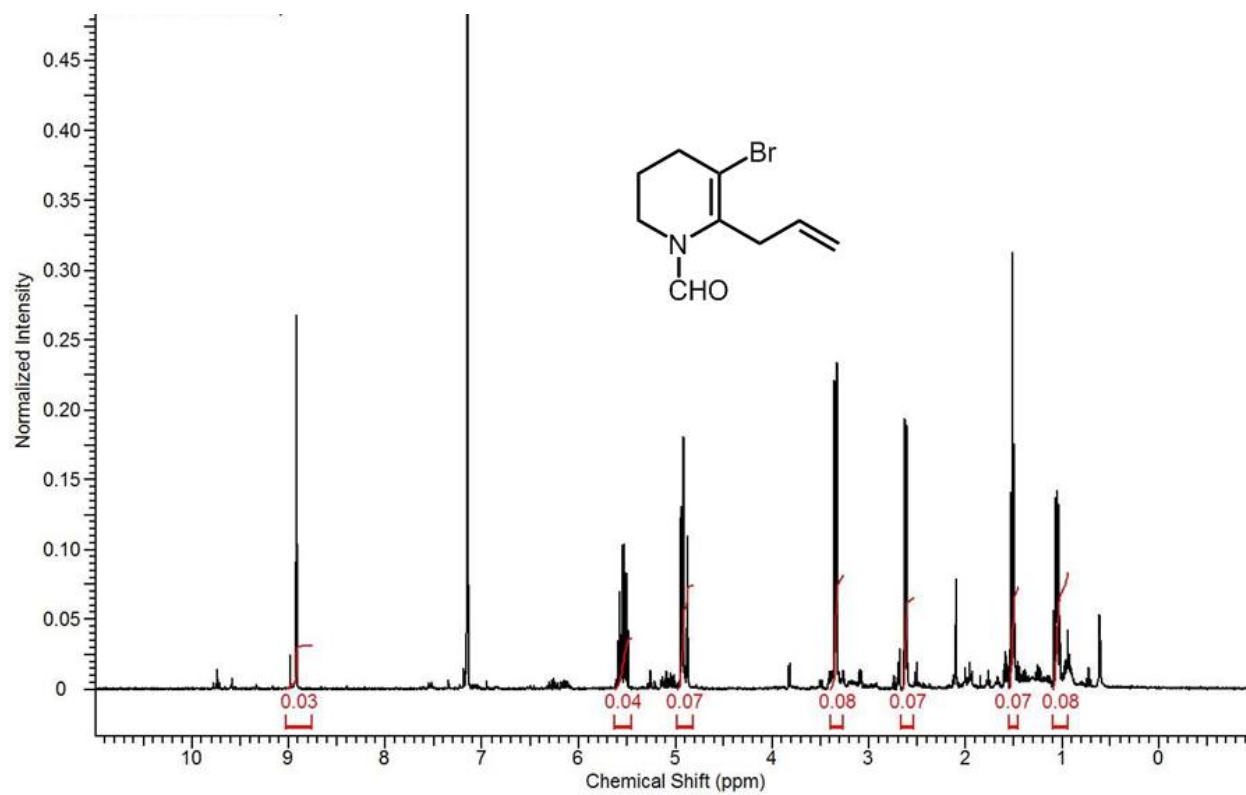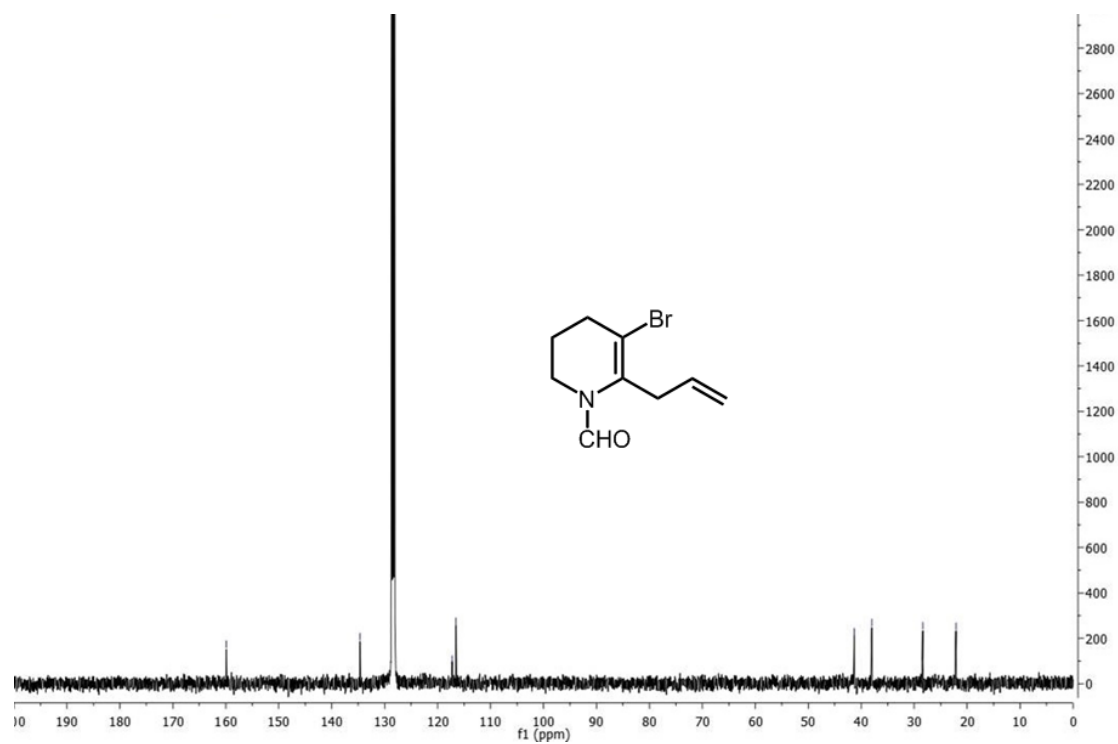



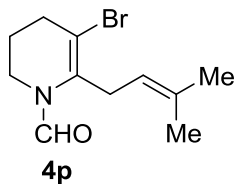

Prepared from **3b** (377 mg, 1 mmol) and dimethylallyl bromide (222 mg, 1.5 mmol, 1.5 equiv) using General Procedure F. T = 23 °C for 12 h. Purification: Flash chromatography on silica (pretreated with 1% Et<sub>3</sub>N) eluting with hexane/EtOAc (90:10). Yield = 139 mg, 54%. <sup>1</sup>H NMR (400 MHz, C<sub>6</sub>D<sub>6</sub>) δ 8.85 (1H), 5.29 to 5.27 (1H), 3.68 to 3.66 (2H), 3.36 to 3.33 (2H), 1.46 to 1.41 (2H), 1.34 to 1.33 (6H), 1.07 to 1.04 (2H). <sup>13</sup>C NMR (101 MHz, C<sub>6</sub>D<sub>6</sub>) δ 158.78, 139.21, 125.05, 120.99, 108.27, 40.67, 29.15, 25.17, 23.31, 20.64, 16.83. **HRMS-ESI<sup>+</sup>** (*m/z*): calc for C<sub>11</sub>H<sub>16</sub>BrNO [M]<sup>+</sup> 257.0415, found 257.0419.

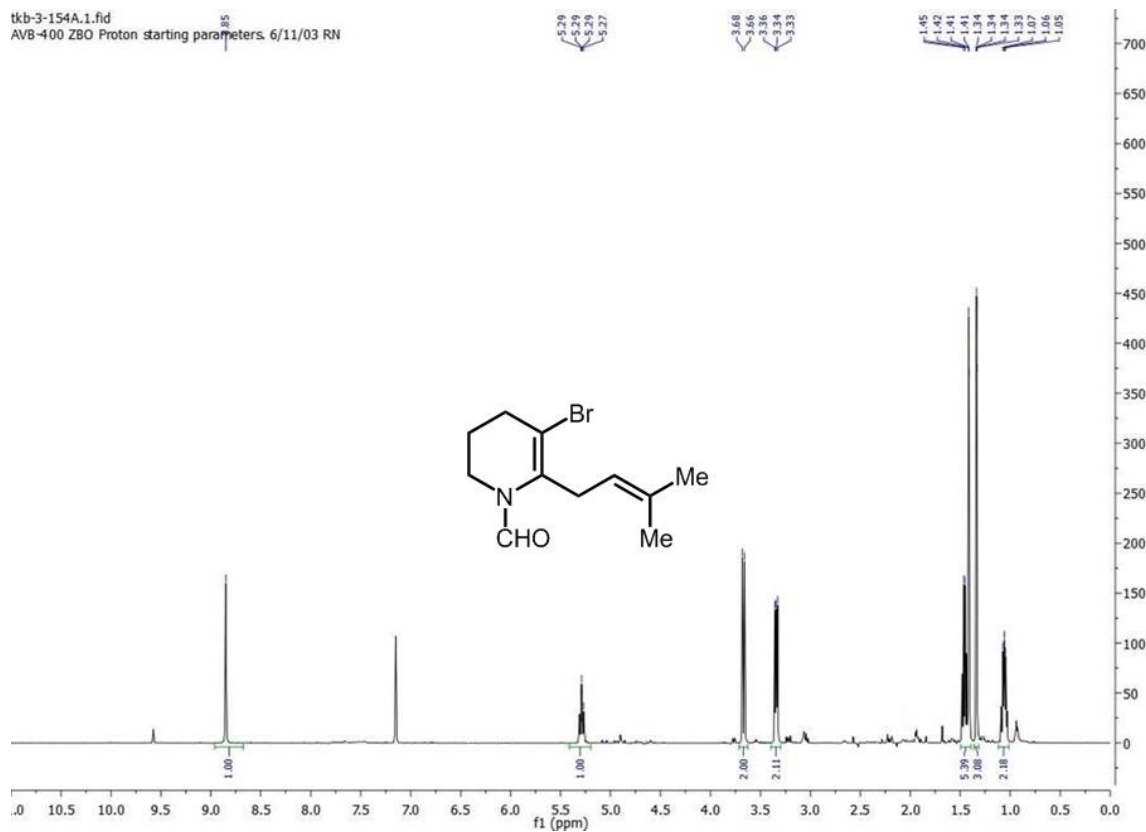

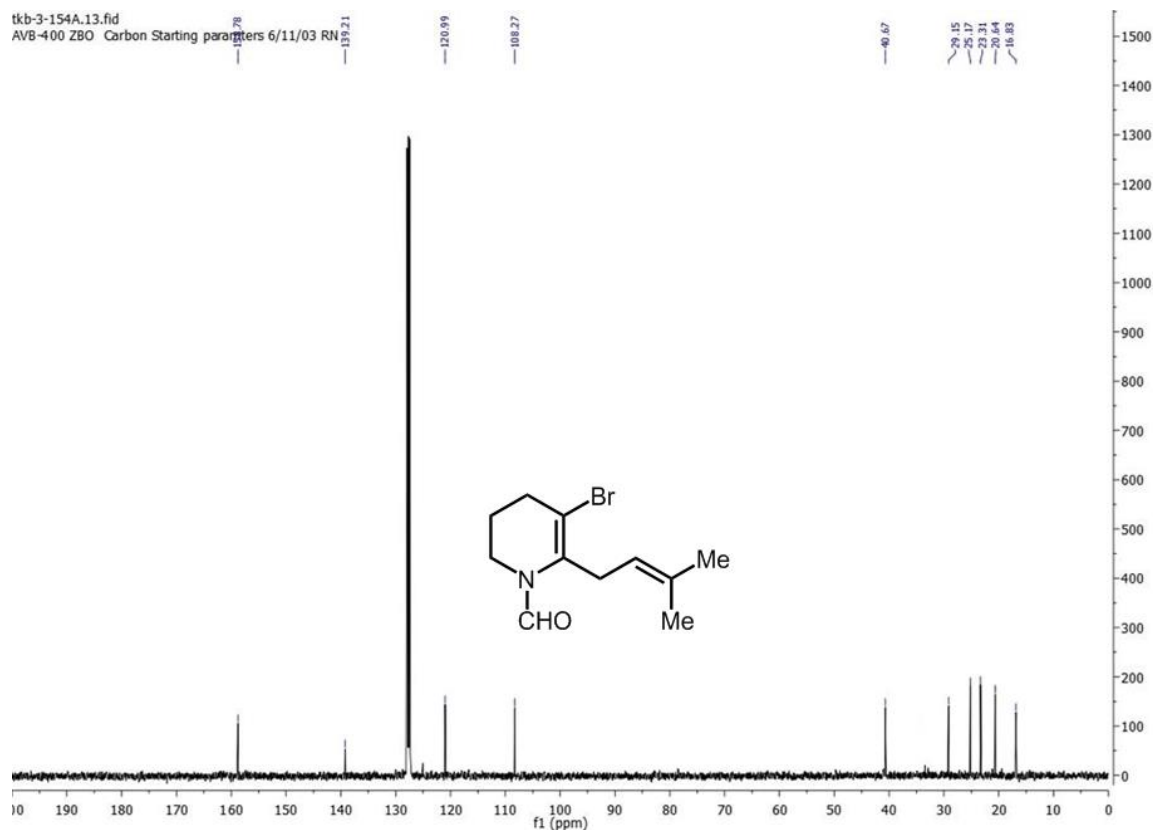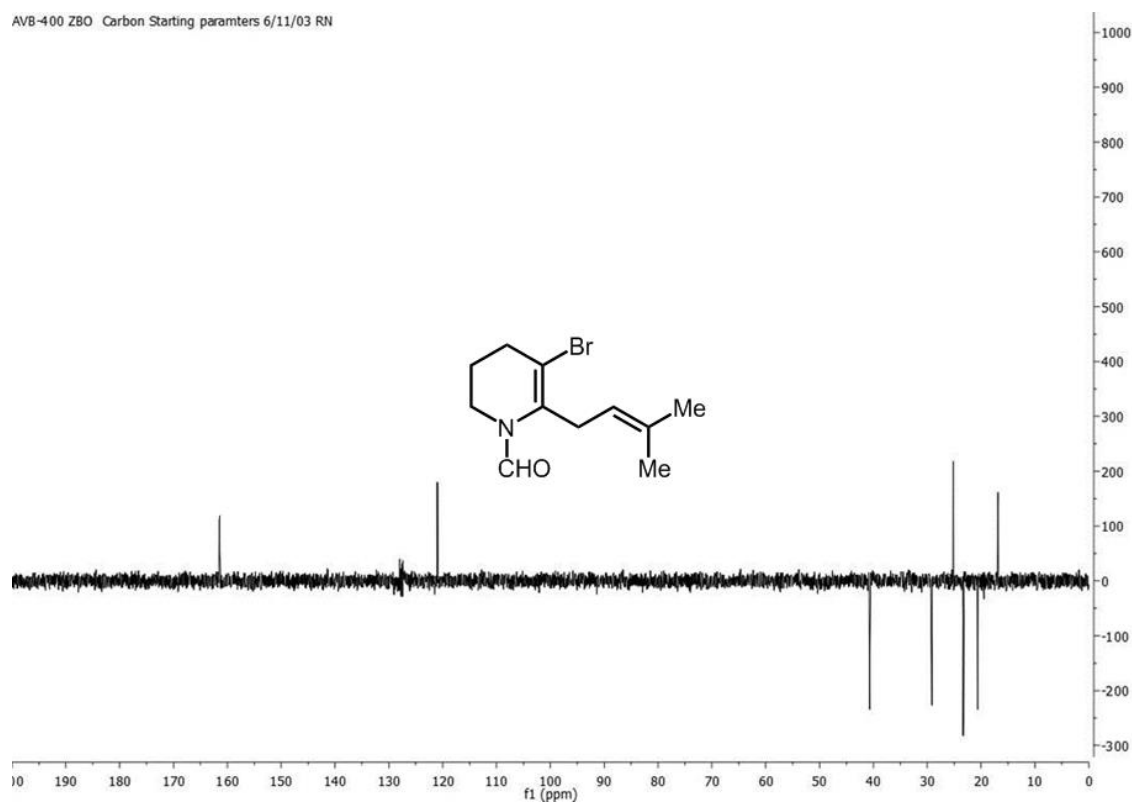

## References

- (1) Bassler, D. P.; Alwali, A.; Spence, L.; Beale, O.; Beng, T. K. *J. Organomet. Chem.* **2015**, 780, 6.
- (2) Beng, T. K.; Wilkerson-Hill, S. M.; Sarpong, R. *Org. Lett.* **2014**, 16, 916.
- (3) Bassler, D. P.; Spence, L.; Alwali, A.; Beale, O.; Beng, T. K. *Org. Biomol. Chem.* **2015**, 13, 2285.
